# Supplementary material for: Interleukin-6 deficiency exacerbates Huntington’s disease model phenotypes
Source: Mol Neurodegener. 2020 May 24;15:29. doi: 10.1186/s13024-020-00379-3 (PMC7247164; doi:10.1186/s13024-020-00379-3)
Supplement: Supplementary file 1 — Additional file 1: Supplementary materials. [file 13024_2020_379_MOESM1_ESM.zip]

Archive with 3 entries (3 files):
- 13024_2020_379_MOESM1_ESM/Table S1_WT_KO_vs_WT_WT_042120.xlsx
- 13024_2020_379_MOESM1_ESM/Table S2_R62_KO_vs_R62_WT_042120.xlsx
- 13024_2020_379_MOESM1_ESM/Wertz et al Supplement_ESM.pdf
