# Supplementary material for: Interleukin-6 deficiency exacerbates Huntington’s disease model phenotypes
Source: Mol Neurodegener. 2020 May 24;15:29. doi: 10.1186/s13024-020-00379-3 (PMC7247164; doi:10.1186/s13024-020-00379-3)
Supplement: Supplementary file 1 — Additional file 1: Supplementary materials. [file 13024_2020_379_MOESM1_ESM.zip › 13024_2020_379_MOESM1_ESM/Table S1_WT_KO_vs_WT_WT_042120.xlsx]

## Sheet: dSPN
feature	group	avgExpr	logFC	statistic	auc	pval	padj	pct_in	pct_out
AC149090.1	WT_KO	0.844612	-0.593895	3911214	0.324297	1.35678e-146	1.4759e-142	59.4557	76.9504
mt-Atp6	WT_KO	0.662136	-0.404623	4679665	0.388013	6.58235e-66	1.79007e-62	44.6128	59.4563
mt-Co3	WT_KO	0.704523	-0.388127	4721037	0.391444	5.45107e-61	1.18593e-57	47.4467	61.3771
Snhg11	WT_KO	3.44428	-0.375249	4438603	0.368026	7.09944e-81	3.86138e-77	98.9057	99.7045
mt-Co2	WT_KO	0.538037	-0.310744	4946262	0.410118	6.89754e-46	8.33683e-43	38.6925	51.3002
Rgs20	WT_KO	1.20444	-0.251857	5.13185e+06	0.425506	1.93962e-27	6.20565e-25	72.5028	74.4681
mt-Cytb	WT_KO	0.305264	-0.238658	5144848	0.426584	3.12259e-39	2.61288e-36	23.7093	36.1702
Ntrk2	WT_KO	1.25504	-0.20722	5.28808e+06	0.43846	3.40709e-19	3.22281e-17	76.0101	73.1678
Pde7b	WT_KO	3.08898	-0.206176	4979979	0.412914	3.17028e-36	2.15539e-33	98.7935	98.6702
mt-Nd2	WT_KO	0.356188	-0.20143	5.30807e+06	0.440117	1.80293e-25	4.6696e-23	27.413	36.9681
Ldlrad4	WT_KO	1.62385	-0.190336	5.27484e+06	0.437362	1.29471e-19	1.34132e-17	84.2873	82.2104
mt-Co1	WT_KO	0.448707	-0.175834	5426343	0.449924	1.06673e-16	6.10729e-15	34.7924	40.8392
Strbp	WT_KO	1.95132	-0.17332	5.07561e+06	0.420843	3.10955e-30	1.47068e-27	93.8833	91.578
Cst3	WT_KO	0.22565	-0.17251	5572247	0.462022	3.22928e-13	6.78148e-12	22.0258	26.6844
Cacnb2	WT_KO	3.36798	-0.169543	5306624	0.439998	4.74699e-18	3.82502e-16	99.2985	98.3747
Gabarapl2	WT_KO	0.061584	-0.164042	5312612	0.440494	9.52072e-52	1.72611e-48	6.62177	17.9669
Dpp6	WT_KO	2.59038	-0.163566	5.03139e+06	0.417177	6.27511e-33	3.59266e-30	98.1762	95.5969
Spred1	WT_KO	0.626697	-0.161502	5451003	0.451969	1.88077e-13	4.13314e-12	51.1785	52.3641
Mpp7	WT_KO	0.890908	-0.160314	5426528	0.449939	1.35063e-13	3.11274e-12	64.6745	63.0319
Trim9	WT_KO	1.10655	-0.151744	5404016	0.448073	3.65122e-14	1.00298e-12	73.7654	71.2175
Apoe	WT_KO	0.240543	-0.148136	5667165	0.469892	1.12295e-08	6.08946e-08	23.6813	26.4775
Sik3	WT_KO	1.30483	-0.144267	5393474	0.447199	1.87972e-14	5.58677e-13	80.7239	76.0047
Ubb	WT_KO	0.208728	-0.139276	5.59383e+06	0.463812	8.62534e-13	1.55858e-11	19.9495	25.0591
Atxn1	WT_KO	2.77945	-0.139264	5.19721e+06	0.430926	2.09242e-23	4.29459e-21	98.064	97.1927
Reln	WT_KO	1.57985	-0.139229	5.44424e+06	0.451408	2.01035e-12	3.30841e-11	83.642	79.8759
Pcp4	WT_KO	0.387214	-0.138672	5.63585e+06	0.467296	2.36569e-08	1.17239e-07	32.9125	35.4905
Ntm	WT_KO	3.83807	-0.138462	5.4049e+06	0.448146	7.24684e-14	1.82903e-12	99.018	98.0201
mt-Nd4	WT_KO	0.339729	-0.138025	5548826	0.46008	1.03803e-12	1.84203e-11	26.936	32.7719
Slc2a13	WT_KO	1.65605	-0.137555	5346535	0.443307	2.53956e-16	1.25002e-14	88.0191	83.5106
Zdhhc14	WT_KO	1.37303	-0.132991	5420457	0.449436	2.33861e-13	5.0475e-12	82.2391	77.039
Cacng3	WT_KO	0.816586	-0.131475	5542927	0.459591	1.78313e-09	1.21687e-08	61.9809	59.4563
Vmp1	WT_KO	0.58369	-0.1302	5.63574e+06	0.467286	3.81185e-07	1.3952e-06	49.5791	47.6064
Tmsb4x	WT_KO	0.200934	-0.129939	5695785	0.472265	1.85852e-08	9.51387e-08	19.248	22.7837
Prkcb	WT_KO	2.75954	-0.12944	5.26425e+06	0.436484	4.89129e-20	5.42933e-18	97.8956	96.6903
Clvs1	WT_KO	1.09457	-0.125813	5495120	0.455627	9.52608e-11	9.31039e-10	73.8496	70.3014
mt-Nd1	WT_KO	0.224806	-0.122016	5584909	0.463071	1.6626e-13	3.7061e-12	18.7991	25.0296
Ctnna3	WT_KO	2.63469	-0.121824	5.41087e+06	0.448641	1.24337e-13	2.89622e-12	96.9697	95.065
Osbpl8	WT_KO	1.98177	-0.121754	5450696	0.451943	3.96552e-12	6.0247e-11	91.1897	89.5686
Spred2	WT_KO	0.499415	-0.119716	5668503	0.470003	1.44654e-06	4.51521e-06	42.0314	42.435
Atp6v0b	WT_KO	0.654004	-0.118697	5665509	0.469754	4.40721e-06	1.2372e-05	56.2851	51.9799
Bcl2	WT_KO	0.284564	-0.117957	5.67795e+06	0.470786	9.58049e-08	4.05828e-07	26.4029	29.4031
Tle4	WT_KO	1.04167	-0.116876	5578213	0.462516	3.92554e-08	1.84857e-07	71.0999	66.2234
Pcdh7	WT_KO	1.71868	-0.109905	5586326	0.463189	9.76722e-08	4.12773e-07	82.4355	79.2849
Tspan5	WT_KO	0.939101	-0.109543	5597698	0.464132	1.23675e-07	5.1037e-07	67.5926	62.8842
Hspa8	WT_KO	0.281109	-0.109451	5.77246e+06	0.478622	7.43537e-05	0.000158841	26.0101	27.4527
Srpk2	WT_KO	0.971966	-0.108247	5552473	0.460382	6.24001e-09	3.63767e-08	70.4826	66.1348
Oxr1	WT_KO	0.580764	-0.107867	5.76547e+06	0.478043	0.00052683	0.000945999	46.0718	44.2967
Kcnk2	WT_KO	1.10087	-0.107238	5677265	0.470729	1.70419e-05	4.18092e-05	69.5286	64.8345
Nebl	WT_KO	2.02527	-0.105562	5390601	0.44696	1.91466e-14	5.65875e-13	94.1077	90.2187
P4ha1	WT_KO	0.637958	-0.103441	5.75292e+06	0.477002	0.000393878	0.000725958	51.8238	48.6111
Ubash3b	WT_KO	0.0810922	-0.10329	5654314	0.468826	1.24019e-16	6.954e-15	8.24916	13.9184
Plcb1	WT_KO	4.1041	-0.102455	5.34441e+06	0.443131	2.2657e-16	1.14634e-14	100	99.9409
Myo9a	WT_KO	1.24754	0.1001	6361789	0.527486	6.306e-05	0.000136728	80.1347	68.026
Focad	WT_KO	1.14642	0.100254	6.39846e+06	0.530527	8.28395e-06	2.17087e-05	77.4411	65.13
Cdk19	WT_KO	0.599894	0.100386	6627841	0.549546	3.23003e-15	1.19209e-13	50.7015	36.643
Agbl4	WT_KO	1.16157	0.10039	6402028	0.530823	6.2183e-06	1.68056e-05	74.6914	62.1454
Zmym2	WT_KO	0.698321	0.100394	6574402	0.545115	3.79309e-12	5.78699e-11	57.6038	43.0851
Igsf9b	WT_KO	0.50069	0.100405	6649500	0.551342	9.70482e-18	7.43444e-16	43.2099	29.8168
Ppip5k1	WT_KO	0.617492	0.100523	6.62646e+06	0.549431	7.0535e-15	2.30414e-13	53.0022	38.0319
Tmtc1	WT_KO	1.1664	0.100591	6386588	0.529543	1.4548e-05	3.62633e-05	74.0741	61.4953
Atp8a2	WT_KO	1.01289	0.100851	6.43685e+06	0.53371	6.79623e-07	2.30171e-06	71.6891	59.1608
Prkar2b	WT_KO	0.875735	0.100874	6491897	0.538274	1.08185e-08	5.90784e-08	66.1897	52.3641
Prickle2	WT_KO	1.1263	0.100944	6404272	0.531009	5.39684e-06	1.48362e-05	73.9338	62.1749
Fam214a	WT_KO	0.696592	0.101066	6596186	0.546921	4.30064e-13	8.55682e-12	56.8462	42.3463
Sgcz	WT_KO	4.03014	0.101152	6.43401e+06	0.533474	1.3589e-06	4.27229e-06	96.8575	96.4539
Golgb1	WT_KO	0.625269	0.101181	6618196	0.548746	2.10918e-14	6.18428e-13	53.6476	39.0071
Rps6ka3	WT_KO	1.30388	0.101257	6344357	0.526041	0.000151558	0.000303731	80.4153	68.9125
Fryl	WT_KO	0.601886	0.101286	6.63732e+06	0.550332	1.47874e-15	5.95769e-14	51.4871	37.0863
Nrcam	WT_KO	1.42364	0.101629	6.3266e+06	0.524568	0.000368077	0.000683033	84.2873	73.552
Pacsin1	WT_KO	1.02948	0.101881	6430850	0.533213	1.06234e-06	3.43012e-06	73.8777	60.2246
A830018L16Rik	WT_KO	0.853579	0.101916	6504782	0.539343	2.57167e-09	1.66417e-08	61.1111	48.4338
Luc7l3	WT_KO	0.660639	0.101984	6.6357e+06	0.550198	6.48551e-15	2.13786e-13	56.1448	40.5733
Dync1i2	WT_KO	0.897705	0.10207	6501640	0.539082	6.14024e-09	3.58719e-08	68.3221	53.6348
Strip2	WT_KO	0.675967	0.102346	6583788	0.545893	5.60875e-13	1.07986e-11	52.5253	39.4504
Ints6l	WT_KO	0.477705	0.102392	6707078	0.556116	7.51201e-21	9.50182e-19	43.9955	29.2258
Vti1a	WT_KO	1.16836	0.10273	6391306	0.529934	1.23002e-05	3.11847e-05	77.385	64.7754
Ppp4r4	WT_KO	0.977978	0.102788	6.47782e+06	0.537107	4.14113e-08	1.93519e-07	70.4265	57.2104
Snx10	WT_KO	0.502903	0.102802	6.67258e+06	0.553255	1.40614e-18	1.25377e-16	45.0337	30.8806
Golga4	WT_KO	0.660395	0.102952	6.61227e+06	0.548255	6.96663e-14	1.77478e-12	55.9764	40.987
Mtus2	WT_KO	0.9952	0.103004	6481389	0.537403	3.17998e-08	1.52791e-07	70.3704	56.7671
Gls	WT_KO	1.12534	0.103167	6.4392e+06	0.533905	7.15528e-07	2.41235e-06	76.3187	64.3617
Rnf169	WT_KO	0.844888	0.10319	6504429	0.539313	3.54344e-09	2.20638e-08	63.8328	50.8865
Uggt2	WT_KO	0.604647	0.103192	6645581	0.551017	6.74606e-16	2.95902e-14	52.1324	36.9681
Nol4l	WT_KO	0.406789	0.103318	6.67333e+06	0.553317	4.69452e-21	6.15265e-19	36.8967	24.2612
Kcnt1	WT_KO	0.474749	0.103352	6730241	0.558036	2.71944e-22	4.93034e-20	43.9955	28.6052
Tra2a	WT_KO	0.881831	0.103355	6506302	0.539469	3.93349e-09	2.41116e-08	67.0595	52.63
Strn3	WT_KO	1.16261	0.103654	6396570	0.53037	9.2046e-06	2.39597e-05	77.6094	64.8641
Tmod1	WT_KO	0.644472	0.103723	6603355	0.547516	1.08633e-13	2.58016e-12	53.9562	39.8345
Hdac9	WT_KO	0.845454	0.103828	6.50455e+06	0.539324	2.53532e-09	1.64541e-08	60.5499	48.4929
Lsamp	WT_KO	4.35735	0.103942	6405217	0.531087	7.24511e-06	1.9238e-05	99.8878	99.5272
Tsc22d1	WT_KO	0.930789	0.103946	6486404	0.537819	1.98562e-08	1.00801e-07	69.0236	54.7281
Rarb	WT_KO	3.25706	0.104141	6.42743e+06	0.532929	2.0125e-06	6.09465e-06	99.6352	98.2565
Cep128	WT_KO	0.478858	0.104345	6704481	0.555901	2.8113e-21	3.87105e-19	42.0314	27.6596
Rbm39	WT_KO	1.53878	0.104372	6339874	0.525669	0.000204665	0.000399847	88.2155	78.0437
2020-09-11	WT_KO	0.801778	0.104378	6.52238e+06	0.540801	7.49933e-10	5.71273e-09	62.7104	49.0544
Naaladl2	WT_KO	0.916417	0.104383	6.46431e+06	0.535987	6.35241e-08	2.82624e-07	62.5421	51.7435
Scai	WT_KO	0.733919	0.104432	6584533	0.545955	2.19094e-12	3.56782e-11	59.2873	45.1241
Smurf2	WT_KO	0.569852	0.104482	6.65521e+06	0.551815	9.94414e-17	5.75385e-15	49.523	35.2541
Slc4a3	WT_KO	0.588494	0.10449	6669496	0.553	3.67651e-17	2.36645e-15	51.459	36.1998
Ptk2	WT_KO	1.13086	0.104586	6409223	0.531419	4.22477e-06	1.19122e-05	75.8698	62.7955
Ppp2r5c	WT_KO	0.715681	0.104901	6602538	0.547448	3.70234e-13	7.64214e-12	59.4276	43.7943
Tcf12	WT_KO	1.12827	0.104952	6414562	0.531862	3.1019e-06	8.99798e-06	75.8979	63.0319
Ccdc85a	WT_KO	0.526663	0.105003	6656257	0.551902	7.54291e-18	5.90301e-16	44.248	30.6738
Zfp704	WT_KO	0.592688	0.105007	6671399	0.553158	2.38853e-17	1.6239e-15	50.8698	35.7565
Slc44a5	WT_KO	0.474417	0.105046	6.6767e+06	0.553597	6.25011e-20	6.79887e-18	40.8249	27.3936
Wasf1	WT_KO	0.847913	0.105087	6.54343e+06	0.542547	1.79503e-10	1.63537e-09	65.1796	50.7979
Hivep3	WT_KO	0.778501	0.105156	6568367	0.544615	1.17106e-11	1.52561e-10	61.055	45.9811
Nfx1	WT_KO	0.742043	0.105572	6.60345e+06	0.547524	4.30024e-13	8.55682e-12	60.7464	44.7695
Col6a1	WT_KO	0.231807	0.105594	6721255	0.557291	1.33038e-37	9.64793e-35	22.3345	10.195
Shank3	WT_KO	0.683905	0.105861	6.61141e+06	0.548184	1.11533e-13	2.63752e-12	57.5477	42.5236
Specc1l	WT_KO	0.457659	0.105896	6734700	0.558406	4.82145e-23	9.53595e-21	42.5084	27.3641
Rasgrf1	WT_KO	1.19791	0.106011	6386802	0.52956	1.57303e-05	3.88454e-05	77.0763	64.8936
Mras	WT_KO	0.409488	0.106049	6736942	0.558592	1.31382e-24	3.04079e-22	38.8608	24.2317
Wscd2	WT_KO	0.839178	0.106235	6.5218e+06	0.540753	8.80854e-10	6.59005e-09	64.1695	49.4976
Man1a	WT_KO	1.06199	0.106586	6.4341e+06	0.533482	6.85532e-07	2.31885e-06	68.0976	56.4716
Adgrl1	WT_KO	0.691692	0.106617	6.61983e+06	0.548882	4.98676e-14	1.31985e-12	57.3513	42.8487
Sbf2	WT_KO	1.20893	0.106653	6.39715e+06	0.530418	9.32074e-06	2.42388e-05	79.0404	67.169
1110051M20Rik	WT_KO	0.918757	0.106749	6.50985e+06	0.539763	3.43561e-09	2.14785e-08	68.8272	53.8121
Igf1r	WT_KO	0.893367	0.106844	6519438	0.540558	1.32332e-09	9.4024e-09	65.8249	51.9799
Kcnq2	WT_KO	0.720759	0.107062	6.60666e+06	0.54779	2.66863e-13	5.71444e-12	59.7924	44.0012
Rnf180	WT_KO	0.637509	0.107191	6620217	0.548914	1.20422e-14	3.72144e-13	52.1886	38.2092
Ankrd11	WT_KO	1.14609	0.107263	6403275	0.530926	6.28478e-06	1.69726e-05	77.6655	64.6868
Syn3	WT_KO	1.12034	0.107497	6429771	0.533123	1.19804e-06	3.81841e-06	74.7755	62.0863
Cdc42bpa	WT_KO	1.53455	0.10758	6344537	0.526056	0.00016327	0.000325045	87.4579	77.7778
Ulk2	WT_KO	0.668124	0.107991	6646254	0.551073	1.97857e-15	7.65941e-14	55.6958	40.3369
Ccdc88c	WT_KO	1.07971	0.108098	6452680	0.535023	2.77182e-07	1.04949e-06	74.7475	61.1111
Myo3b	WT_KO	0.485679	0.108248	6549759	0.543072	9.92831e-15	3.13044e-13	33.8945	24.2317
Upp2	WT_KO	1.08287	0.108656	6.46529e+06	0.536068	1.10627e-07	4.62312e-07	71.8013	60.3723
Asxl2	WT_KO	0.65337	0.108774	6.63477e+06	0.550121	6.09245e-15	2.03293e-13	55.1347	40.5142
Nalcn	WT_KO	1.53053	0.109179	6.32419e+06	0.524369	0.000421105	0.000771365	87.5982	76.8026
Ppp1r12b	WT_KO	0.954514	0.109273	6511998	0.539941	3.36342e-09	2.10999e-08	70.4545	55.6442
Plcl2	WT_KO	1.44035	0.109278	6.36768e+06	0.527975	5.0376e-05	0.000111222	84.8204	74.5863
Ttc3	WT_KO	2.21152	0.10961	6.33585e+06	0.525335	0.000255469	0.00048995	96.1841	91.1643
Tgfbr3	WT_KO	0.542986	0.109794	6696349	0.555226	1.84511e-19	1.84139e-17	46.6891	32.2695
Phf21a	WT_KO	1.46866	0.110129	6326364	0.524549	0.000376554	0.000697217	86.2514	74.4681
Gpm6a	WT_KO	1.52107	0.110443	6353481	0.526797	0.000105072	0.000217874	87.009	76.773
Arhgap18	WT_KO	0.638412	0.110466	6.66228e+06	0.552401	1.45667e-16	7.96267e-15	52.6936	37.9433
Zfr	WT_KO	1.07344	0.110514	6.46375e+06	0.53594	1.3177e-07	5.39884e-07	74.2985	60.7565
Sv2b	WT_KO	0.754825	0.111254	6609334	0.548011	2.28855e-13	4.95914e-12	59.8485	44.9173
Onecut2	WT_KO	0.627983	0.111357	6626726	0.549454	3.41241e-15	1.24564e-13	50.3086	36.7021
Kmt2e	WT_KO	0.857727	0.111385	6540555	0.542309	2.45862e-10	2.16382e-09	65.881	51.5366
Ptbp2	WT_KO	0.541122	0.11142	6733601	0.558315	2.61985e-21	3.65369e-19	48.0359	32.4173
Jazf1	WT_KO	1.07748	0.111472	6449512	0.53476	3.30794e-07	1.22895e-06	74.3547	60.2246
Jakmip3	WT_KO	0.477035	0.11186	6754741	0.560068	1.13207e-23	2.41464e-21	44.1639	28.9598
Mpc1	WT_KO	0.508841	0.112299	6733532	0.558309	6.62571e-22	1.10884e-19	45.8474	30.3783
Dis3l2	WT_KO	0.929576	0.112348	6.53983e+06	0.542248	3.69973e-10	3.07924e-09	69.3883	54.9941
Pi4ka	WT_KO	1.22958	0.112379	6.39201e+06	0.529992	1.25445e-05	3.1683e-05	80.3311	66.8735
Etnk1	WT_KO	1.11554	0.112726	6.453e+06	0.535049	2.90056e-07	1.09329e-06	76.0382	63.0615
Immp2l	WT_KO	1.32943	0.112977	6395619	0.530291	1.0076e-05	2.60411e-05	78.6476	66.9031
Spata13	WT_KO	0.435794	0.113042	6762528	0.560714	6.83472e-26	1.81337e-23	39.8709	24.8818
Rims2	WT_KO	2.66257	0.113477	6470325	0.536486	1.3982e-07	5.67734e-07	98.6251	95.922
Pdzrn4	WT_KO	0.669195	0.113634	6.56159e+06	0.544053	7.06821e-13	1.31883e-11	45.3704	34.4267
Susd1	WT_KO	0.476598	0.11394	6.75056e+06	0.559722	8.34615e-24	1.81579e-21	42.9012	28.1028
Tfdp2	WT_KO	0.786558	0.114312	6610135	0.548078	3.25681e-13	6.82613e-12	62.1493	47.0154
Dlgap4	WT_KO	0.811482	0.114688	6594123	0.54675	1.85945e-12	3.08811e-11	63.8047	48.6407
Epb41l1	WT_KO	1.01926	0.114828	6489365	0.538064	2.11534e-08	1.06383e-07	72.8956	59.1903
Zfp462	WT_KO	1.06643	0.114995	6.46253e+06	0.53584	1.36845e-07	5.57529e-07	73.3165	59.9586
Galnt13	WT_KO	2.70408	0.115092	6.3925e+06	0.530033	1.46253e-05	3.64311e-05	98.2043	95.5674
Aak1	WT_KO	1.16044	0.115205	6.44263e+06	0.53419	5.9641e-07	2.06026e-06	77.9461	64.6572
Erc2	WT_KO	3.36153	0.115286	6482525	0.537497	6.25269e-08	2.78757e-07	99.6633	98.3747
Kansl1l	WT_KO	0.883541	0.115677	6548375	0.542957	1.2602e-10	1.19412e-09	65.4321	51.3889
Mgat5b	WT_KO	0.673375	0.11574	6.68914e+06	0.554629	2.04586e-17	1.39968e-15	56.257	39.9823
Cacna1e	WT_KO	2.22148	0.115777	6.3577e+06	0.527148	8.91306e-05	0.000187633	95.8754	90.3664
Snrnp70	WT_KO	1.09337	0.115819	6476908	0.537031	5.90123e-08	2.64716e-07	75.8979	62.7364
Nav3	WT_KO	1.88443	0.115851	6361228	0.52744	7.38803e-05	0.000157923	91.6105	84.1608
Rit2	WT_KO	1.29656	0.116124	6431336	0.533253	1.29217e-06	4.0885e-06	79.4613	68.5284
Lrrn2	WT_KO	0.649015	0.116382	6679128	0.553798	3.62581e-17	2.34771e-15	54.2649	38.9184
Fchsd2	WT_KO	0.889838	0.116449	6.56705e+06	0.544506	2.93138e-11	3.36012e-10	66.3019	52.039
Grip1	WT_KO	1.68288	0.116635	6364209	0.527687	6.13685e-05	0.0001333	86.2233	77.4232
Ncam1	WT_KO	1.52515	0.116936	6362713	0.527563	6.6188e-05	0.000142856	87.009	76.5366
Cnksr2	WT_KO	2.23127	0.117145	6321377	0.524136	0.000494487	0.000891748	95.8474	90.0709
Cpne5	WT_KO	1.29832	0.11728	6.38736e+06	0.529607	1.669e-05	4.10383e-05	81.8462	68.4693
Cntnap5c	WT_KO	0.899449	0.117367	6551067	0.54318	8.05933e-11	8.03569e-10	63.1874	50.0296
Cacna1b	WT_KO	0.900562	0.11751	6.55858e+06	0.543803	6.79372e-11	6.94568e-10	67.0875	53.6348
Cntnap5b	WT_KO	1.46933	0.117541	6415205	0.531915	3.43084e-06	9.86015e-06	79.8541	69.474
Prkg1	WT_KO	1.2393	0.117595	6.35894e+06	0.52725	2.81474e-05	6.57337e-05	53.844	47.8428
Nbea	WT_KO	2.85612	0.117773	6400308	0.53068	9.52686e-06	2.47217e-05	98.9899	96.4243
Sptbn1	WT_KO	1.67695	0.118201	6.33701e+06	0.525432	0.000236671	0.000455987	89.927	79.9941
Fndc3b	WT_KO	0.841357	0.118238	6.59491e+06	0.546816	2.07357e-12	3.4073e-11	64.7868	50.0296
Kif26b	WT_KO	0.679175	0.118312	6675145	0.553468	6.68514e-17	4.01773e-15	54.7138	39.4504
Ahcyl2	WT_KO	1.11042	0.118328	6459356	0.535576	1.79016e-07	7.08636e-07	75.1403	60.6087
Ppfia2	WT_KO	1.39304	0.118384	6414267	0.531838	3.81089e-06	1.0835e-05	82.5196	71.9858
Kcnn2	WT_KO	0.824122	0.118598	6627041	0.54948	6.3244e-14	1.62554e-12	62.2615	46.4539
Pde1c	WT_KO	1.19229	0.118763	6.45776e+06	0.535444	1.38093e-07	5.6219e-07	66.0494	56.6785
Ldb2	WT_KO	1.04698	0.118824	6506977	0.539525	4.81286e-09	2.88453e-08	69.5286	56.2352
Esrrg	WT_KO	1.32024	0.118875	6388039	0.529663	1.55983e-05	3.85544e-05	79.798	67.3759
Cdk12	WT_KO	0.717707	0.119574	6673688	0.553347	2.43958e-16	1.21733e-14	58.8384	42.6123
Ylpm1	WT_KO	1.10803	0.119733	6.49253e+06	0.538327	1.9988e-08	1.01366e-07	76.0662	62.3818
Zfp950	WT_KO	0.824046	0.120362	6622270	0.549084	1.49276e-13	3.39002e-12	64.422	48.7589
Myh10	WT_KO	0.870607	0.120422	6.58126e+06	0.545684	8.10451e-12	1.10894e-10	66.3019	50.857
Map7	WT_KO	1.04594	0.121275	6.49206e+06	0.538288	1.79293e-08	9.2215e-08	74.018	58.8948
Bcr	WT_KO	1.12004	0.121321	6452351	0.534995	3.0452e-07	1.13849e-06	76.936	62.5
Rabep1	WT_KO	1.11026	0.121459	6485434	0.537738	3.24031e-08	1.55347e-07	76.3187	61.6135
Dclk3	WT_KO	0.450794	0.121755	6797331	0.563599	6.73331e-28	2.36274e-25	40.7969	25.3251
Hmgcll1	WT_KO	0.864514	0.121766	6.61019e+06	0.548083	5.37392e-13	1.04017e-11	65.1235	50.0887
Ust	WT_KO	0.830182	0.121805	6628693	0.549617	5.18568e-14	1.36917e-12	61.9529	46.3652
Agap1	WT_KO	1.26734	0.121879	6403060	0.530908	6.90231e-06	1.84091e-05	81.6498	67.5827
Ubr3	WT_KO	0.96855	0.122011	6549999	0.543092	1.92684e-10	1.74486e-09	71.5208	56.4125
Gabra2	WT_KO	1.66149	0.122148	6408268	0.53134	5.85724e-06	1.59487e-05	88.7205	79.8463
Adarb2	WT_KO	0.982352	0.122151	6.52254e+06	0.540815	6.95068e-10	5.31712e-09	61.1672	49.6454
Pou2f2	WT_KO	0.435375	0.122779	6.80543e+06	0.564271	3.22441e-29	1.29908e-26	39.3659	23.9066
Rbm26	WT_KO	1.07591	0.122905	6494409	0.538482	1.63892e-08	8.48958e-08	75.3086	60.4314
Smg6	WT_KO	0.87262	0.122926	6602202	0.54742	1.25905e-12	2.19839e-11	65.6566	51.3002
Sgcd	WT_KO	1.31763	0.122999	6450604	0.53485	3.47616e-07	1.28443e-06	76.0662	64.539
Camk2b	WT_KO	1.52531	0.123159	6.38478e+06	0.529393	2.10078e-05	5.04242e-05	87.2615	76.8322
Pcm1	WT_KO	0.897612	0.123694	6587542	0.546205	5.84342e-12	8.34183e-11	68.0135	52.6005
Mapt	WT_KO	1.24175	0.123741	6.42109e+06	0.532403	2.39407e-06	7.1155e-06	81.1728	66.8735
Khdrbs2	WT_KO	0.629941	0.123753	6.60299e+06	0.547486	6.40308e-15	2.1171e-13	44.6128	33.0378
Nxpe4	WT_KO	0.603882	0.124104	6.7064e+06	0.556059	2.32307e-19	2.25628e-17	49.4108	34.9586
2010300C02Rik	WT_KO	1.39514	0.124192	6.38543e+06	0.529447	1.94285e-05	4.70069e-05	84.4837	71.8972
Scaper	WT_KO	0.884395	0.124786	6.60002e+06	0.547239	1.63849e-12	2.77624e-11	66.807	51.0934
Ablim2	WT_KO	2.08386	0.124868	6.37274e+06	0.528395	4.15198e-05	9.3278e-05	95.1178	88.5343
Foxo1	WT_KO	0.981577	0.124916	6559657	0.543893	6.83989e-11	6.98632e-10	68.4905	54.0189
Dab1	WT_KO	3.25936	0.124928	6.51017e+06	0.539789	9.34579e-09	5.21497e-08	99.2144	97.8723
Prkd1	WT_KO	0.909895	0.124982	6.5673e+06	0.544527	1.29717e-11	1.66203e-10	59.9607	47.2518
Rcan2	WT_KO	1.3448	0.125144	6.44587e+06	0.534458	5.46369e-07	1.90372e-06	80.6397	70.331
Kif17	WT_KO	0.498314	0.125284	6800504	0.563862	1.59963e-26	4.46175e-24	44.5847	28.6348
Dpysl5	WT_KO	0.252625	0.125517	6879867	0.570443	4.25391e-51	6.61058e-48	25.7576	10.6974
Eif4g3	WT_KO	0.778893	0.12564	6684077	0.554209	2.09507e-16	1.07501e-14	62.7666	46.0402
Ice1	WT_KO	0.530947	0.126723	6.76921e+06	0.561268	1.28145e-23	2.6807e-21	47.11	31.5898
Thrb	WT_KO	1.62628	0.126849	6.422e+06	0.532479	2.55175e-06	7.52248e-06	85.3816	75.9161
Hnrnpu	WT_KO	0.949881	0.126945	6.58057e+06	0.545626	1.43557e-11	1.81162e-10	70.8193	55.2896
Gucy1b1	WT_KO	0.603001	0.126986	6752327	0.559868	1.30758e-21	1.94848e-19	51.1504	35.2246
Zfp638	WT_KO	1.29769	0.127232	6.45564e+06	0.535268	2.94883e-07	1.10841e-06	81.7059	69.3558
Nell2	WT_KO	1.17381	0.12731	6516603	0.540323	3.73011e-09	2.30677e-08	77.1324	63.4161
Ube4b	WT_KO	0.795464	0.127866	6642219	0.550738	1.73241e-14	5.22028e-13	63.2435	47.2518
Kat6b	WT_KO	1.08836	0.128104	6.51707e+06	0.540361	3.26643e-09	2.05508e-08	75.7576	60.9338
Chd4	WT_KO	0.765912	0.128203	6672015	0.553209	6.12844e-16	2.71459e-14	61.4198	45.8629
Cntn4	WT_KO	3.1828	0.12864	6.50002e+06	0.538948	1.90136e-08	9.71032e-08	99.2705	97.2813
Syndig1	WT_KO	1.07019	0.128981	6540573	0.54231	4.61791e-10	3.72377e-09	72.3064	59.013
Ncoa2	WT_KO	0.951392	0.129012	6.57717e+06	0.545344	1.59463e-11	1.98471e-10	68.5466	54.078
Gria1	WT_KO	3.06899	0.129279	6.47137e+06	0.536573	1.30605e-07	5.36123e-07	99.3547	97.0449
Cd2ap	WT_KO	0.484404	0.129398	6830224	0.566327	1.2336e-28	4.47304e-26	44.3883	28.1028
Nedd4	WT_KO	0.914071	0.129816	6625492	0.549351	2.16795e-13	4.72604e-12	69.0797	53.1028
Dmd	WT_KO	1.97199	0.130296	6364196	0.527686	6.33856e-05	0.00013727	90.853	83.0674
Rfx3	WT_KO	1.21996	0.131686	6487224	0.537887	3.18149e-08	1.52796e-07	77.9742	64.9527
Son	WT_KO	1.20855	0.131933	6494275	0.538471	2.06145e-08	1.04154e-07	80.303	65.5437
Sil1	WT_KO	0.635146	0.132032	6761515	0.56063	9.8523e-22	1.57608e-19	53.0022	36.7612
Atp8a1	WT_KO	1.58367	0.132236	6.40768e+06	0.531291	5.96769e-06	1.61846e-05	87.7666	77.3936
Ano2	WT_KO	0.645643	0.132426	6.72845e+06	0.557888	4.24544e-20	4.86126e-18	51.6835	36.6726
Ngef	WT_KO	1.1765	0.132548	6.48316e+06	0.53755	4.13818e-08	1.93519e-07	78.2828	63.7707
Tspoap1	WT_KO	0.65123	0.133252	6.76964e+06	0.561303	1.09263e-21	1.6514e-19	55.6397	38.8593
Ptprt	WT_KO	1.39728	0.133799	6.45902e+06	0.535548	2.28864e-07	8.84399e-07	79.7699	68.5579
Tomm70a	WT_KO	0.745683	0.134427	6695160	0.555128	2.52117e-17	1.70343e-15	58.7262	43.026
Paxbp1	WT_KO	0.846515	0.134445	6670389	0.553074	1.75893e-15	6.9325e-14	66.358	49.4385
Sez6	WT_KO	1.02726	0.134585	6.56972e+06	0.544727	3.71784e-11	4.1268e-10	70.9315	56.0875
Baz2b	WT_KO	0.923546	0.135744	6.63057e+06	0.549772	1.18053e-13	2.76168e-12	67.8171	52.3641
Fry	WT_KO	2.00398	0.135931	6394524	0.530201	1.29858e-05	3.2699e-05	94.0236	86.5544
Adgrb1	WT_KO	0.834067	0.136045	6683681	0.554176	3.69496e-16	1.73249e-14	64.8148	48.8475
Elmod1	WT_KO	1.95922	0.136427	6388365	0.52969	1.81339e-05	4.41399e-05	94.0797	86.1702
Fnbp1l	WT_KO	1.52403	0.138057	6448184	0.53465	5.25902e-07	1.83888e-06	87.037	75.5024
C2cd5	WT_KO	1.32019	0.138203	6505518	0.539404	1.04066e-08	5.71441e-08	82.6319	69.9764
Srgap3	WT_KO	1.20755	0.138231	6.51168e+06	0.539914	5.67738e-09	3.34916e-08	78.7598	64.4504
Abr	WT_KO	0.774006	0.138594	6.72967e+06	0.557989	8.46016e-19	7.66913e-17	60.6902	44.0603
Acvr1c	WT_KO	0.666756	0.138742	6.74325e+06	0.559115	1.52059e-20	1.81769e-18	53.5634	38.1501
Sv2c	WT_KO	1.04389	0.139377	6585001	0.545994	1.05744e-11	1.39767e-10	70.9035	56.6785
Ppp1r12a	WT_KO	1.04824	0.139621	6572561	0.544962	3.89137e-11	4.30186e-10	74.4669	59.2199
Dtna	WT_KO	1.15598	0.139664	6.5425e+06	0.54247	5.21162e-10	4.14415e-09	77.8339	61.9681
Kcnb2	WT_KO	1.6866	0.140994	6424100	0.532653	2.22962e-06	6.68149e-06	84.8485	74.7931
Gm12394	WT_KO	0.403411	0.141175	6849253	0.567904	2.63599e-35	1.68672e-32	35.2413	20.0946
Slc35f3	WT_KO	1.15022	0.141485	6.54406e+06	0.542599	4.43111e-10	3.59445e-09	76.5432	61.8203
Hdac8	WT_KO	0.952735	0.141538	6646488	0.551092	2.81269e-14	7.95837e-13	68.1818	52.9551
Mical3	WT_KO	1.2276	0.142098	6.52398e+06	0.540934	2.42117e-09	1.58468e-08	79.6577	65.9279
Rnf144a	WT_KO	0.517951	0.142444	6.80871e+06	0.564542	1.7439e-27	5.74851e-25	43.1257	28.0733
4930402H24Rik	WT_KO	1.62522	0.143221	6504055	0.539282	1.33946e-08	7.10822e-08	88.5241	78.9894
Plekha5	WT_KO	2.44796	0.143296	6432122	0.533318	1.52082e-06	4.71592e-06	98.1201	93.3215
Tbc1d8	WT_KO	1.10007	0.143432	6580821	0.545647	2.08542e-11	2.49015e-10	75.3648	59.9291
Zdhhc20	WT_KO	0.734871	0.143725	6785240	0.562597	7.13376e-22	1.17577e-19	59.7924	42.0213
Trank1	WT_KO	1.27421	0.143736	6533054	0.541687	1.29821e-09	9.24211e-09	80.275	68.0556
Tnrc6c	WT_KO	1.73849	0.144521	6421970	0.532476	2.70443e-06	7.9401e-06	91.9473	81.6194
Mapk1	WT_KO	1.07702	0.144972	6.60561e+06	0.547703	2.50679e-12	4.01603e-11	75.0561	60.0177
Ahi1	WT_KO	1.97523	0.145081	6.45759e+06	0.53543	3.12108e-07	1.1643e-06	93.3221	85.6678
Kmt2c	WT_KO	0.794	0.145227	6.73708e+06	0.558603	6.25494e-19	5.76621e-17	62.8227	45.656
Stox2	WT_KO	2.83315	0.146028	6.59202e+06	0.546576	1.79655e-11	2.1909e-10	98.7093	96.2766
Klhl1	WT_KO	0.561473	0.148192	6.73041e+06	0.55805	2.68659e-23	5.412e-21	40.0393	27.2163
Gabrb1	WT_KO	1.9779	0.148205	6437038	0.533726	1.11099e-06	3.56395e-06	92.4242	84.2494
Iqgap2	WT_KO	0.548702	0.14859	6.84026e+06	0.567158	6.98271e-29	2.71278e-26	45.202	29.2849
Arl15	WT_KO	2.15332	0.149394	6.44311e+06	0.534229	7.75766e-07	2.59256e-06	94.4444	87.9433
Nkain3	WT_KO	1.11658	0.150618	6569234	0.544687	2.33754e-11	2.74598e-10	64.9551	52.7482
Wnk1	WT_KO	0.845634	0.15101	6740494	0.558887	7.32362e-19	6.69465e-17	64.8148	47.8428
Slc24a4	WT_KO	0.922136	0.151637	6680193	0.553887	8.47667e-16	3.58043e-14	67.284	51.448
Prkcz	WT_KO	0.970889	0.152915	6678423	0.55374	1.71305e-15	6.85093e-14	71.1841	54.2849
Pnisr	WT_KO	1.46656	0.154309	6527068	0.54119	2.44005e-09	1.59608e-08	86.7284	74.6454
Frmd5	WT_KO	1.44329	0.154645	6506458	0.539482	9.94509e-09	5.50829e-08	83.1089	71.0697
Phc2	WT_KO	1.10399	0.155293	6.62163e+06	0.549031	6.34202e-13	1.19772e-11	75.6173	60.3132
Pde4b	WT_KO	1.52802	0.155927	6479425	0.53724	4.88279e-08	2.24303e-07	73.8496	64.0662
Adcy5	WT_KO	2.35735	0.156424	6522694	0.540828	3.80145e-09	2.34556e-08	96.9416	91.6076
Strn	WT_KO	1.79666	0.157123	6.52878e+06	0.541332	2.32362e-09	1.5319e-08	90.3199	81.0875
Smyd3	WT_KO	1.66649	0.157817	6.49307e+06	0.538372	2.81224e-08	1.36814e-07	87.6824	76.8617
Ivns1abp	WT_KO	0.640798	0.158046	6891342	0.571394	1.10866e-29	4.82402e-27	53.5354	35.0177
Dach1	WT_KO	2.61571	0.160519	6577065	0.545336	6.03053e-11	6.26554e-10	97.2222	93.617
Ddx17	WT_KO	0.800784	0.161466	6802920	0.564063	3.23822e-22	5.59132e-20	63.8608	45.9811
Slc4a4	WT_KO	2.82281	0.162854	6.57507e+06	0.54517	7.0844e-11	7.19552e-10	98.7374	95.4787
Opcml	WT_KO	2.99815	0.163159	6.49583e+06	0.5386	2.52154e-08	1.24058e-07	93.9394	90.8983
Rasgef1b	WT_KO	2.14711	0.163164	6453899	0.535124	3.97134e-07	1.44338e-06	95.7071	87.5
Frmd4a	WT_KO	1.94477	0.164156	6477414	0.537073	8.43562e-08	3.6189e-07	90.4602	81.383
Trpm3	WT_KO	1.06473	0.164566	6520356	0.540634	3.04678e-10	2.59537e-09	53.3109	44.474
Gpc6	WT_KO	1.09406	0.1654	6601953	0.547399	4.04329e-13	8.20576e-12	57.8844	45.7447
Ksr2	WT_KO	1.53015	0.165438	6574671	0.545137	6.37658e-11	6.58106e-10	87.1493	75.6206
Plekha6	WT_KO	0.683889	0.165607	6873457	0.569911	1.06292e-27	3.61327e-25	56.1167	38.5047
Syne1	WT_KO	2.36852	0.165821	6.55682e+06	0.543658	2.95519e-10	2.53122e-09	96.8575	91.2825
Epb41	WT_KO	1.16725	0.169749	6672203	0.553224	6.7342e-15	2.20646e-13	77.2447	61.909
Nexn	WT_KO	0.759673	0.169911	6847525	0.567761	2.04812e-25	5.18126e-23	59.3715	41.8144
Tenm3	WT_KO	1.66786	0.170297	6.50479e+06	0.539343	1.10553e-08	6.01596e-08	82.211	71.0697
Thsd7a	WT_KO	2.63924	0.175175	6500787	0.539011	1.79692e-08	9.23328e-08	96.9136	91.2825
Sorcs2	WT_KO	1.22949	0.175255	6.65033e+06	0.551411	4.4216e-14	1.1935e-12	74.5791	60.4019
Adam23	WT_KO	1.91571	0.175907	6.58906e+06	0.546331	2.21547e-11	2.631e-10	93.2099	83.9243
Cadm1	WT_KO	1.35008	0.177428	6626378	0.549425	4.71375e-13	9.27237e-12	75.7576	63.4752
Ube2e2	WT_KO	1.81374	0.177665	6.60525e+06	0.547673	5.66328e-12	8.15962e-11	91.6386	81.708
Hs3st4	WT_KO	1.83582	0.178584	6.52736e+06	0.541215	2.47549e-09	1.61635e-08	87.3737	78.0142
Npas2	WT_KO	1.63578	0.178764	6549469	0.543048	4.68629e-10	3.77332e-09	88.6644	75.9456
Sesn3	WT_KO	0.989353	0.185664	6818261	0.565335	3.10569e-22	5.53831e-20	70.3143	53.3983
Rps6ka5	WT_KO	1.43952	0.186896	6672532	0.553252	9.86197e-15	3.12765e-13	81.5376	69.474
Mycbp2	WT_KO	2.05638	0.187502	6701852	0.555683	9.0883e-16	3.8024e-14	94.6128	87.6478
Ssbp2	WT_KO	2.09511	0.187633	6.63248e+06	0.549931	5.66209e-13	1.08628e-11	94.8092	87.0567
Msra	WT_KO	1.39039	0.190151	6663756	0.552524	2.02813e-14	5.96271e-13	80.9484	66.3416
Grm3	WT_KO	1.98408	0.192471	6.57155e+06	0.544879	8.77334e-11	8.65243e-10	89.9551	80.6738
Zbtb20	WT_KO	2.09563	0.19336	6551973	0.543255	4.06596e-10	3.33053e-09	89.8709	81.4125
Ddx5	WT_KO	1.45359	0.194157	6.73228e+06	0.558205	3.20285e-17	2.09883e-15	85.1852	72.5473
Arglu1	WT_KO	1.22601	0.19485	6.79165e+06	0.563128	3.31165e-20	3.83235e-18	80.1066	64.1548
Srrm2	WT_KO	1.26408	0.197589	6.74845e+06	0.559546	4.20674e-18	3.47428e-16	81.3973	65.5142
Dtnb	WT_KO	2.06843	0.197602	6684012	0.554203	5.06131e-15	1.74784e-13	94.7531	86.7612
Tenm2	WT_KO	4.11526	0.204604	6593263	0.546679	1.62234e-11	2.01e-10	99.1302	97.5768
Kcnip4	WT_KO	4.52422	0.20907	6.88647e+06	0.57099	1.24684e-24	2.94851e-22	99.9158	99.4976
4930578G10Rik	WT_KO	0.604084	0.209974	7.05803e+06	0.585215	1.26679e-44	1.37802e-41	47.8114	29.1667
Cntnap3	WT_KO	0.923101	0.215907	6939773	0.57541	2.56624e-30	1.26889e-27	62.7104	45.4492
Ndrg4	WT_KO	1.41512	0.218057	6824926	0.565887	1.09304e-21	1.6514e-19	84.0067	69.4149
Limch1	WT_KO	1.36941	0.219426	6813747	0.56496	3.27181e-21	4.44885e-19	82.3513	66.1939
Gulp1	WT_KO	0.877426	0.220875	6927730	0.574411	1.83047e-30	9.9559e-28	57.9686	41.9622
Clasp2	WT_KO	1.19638	0.223854	6910707	0.573	1.24712e-26	3.57004e-24	78.1987	61.2293
Jakmip1	WT_KO	1.91393	0.229837	6779750	0.562141	2.78604e-19	2.68199e-17	92.6487	81.974
Asic2	WT_KO	1.98029	0.237868	6.68564e+06	0.554338	3.12588e-15	1.1685e-13	81.8462	73.3156
Cntnap5a	WT_KO	1.83057	0.241476	6.74491e+06	0.559253	9.00776e-18	6.94939e-16	85.7464	73.7589
Ror1	WT_KO	0.900398	0.245525	7.05013e+06	0.58456	1.61187e-38	1.25242e-35	60.6341	41.3416
Sema3a	WT_KO	0.756407	0.269903	7.14016e+06	0.592024	6.4922e-49	8.82777e-46	52.1605	33.6584
Sntg2	WT_KO	1.02344	0.274083	7152183	0.593022	5.51291e-44	5.45177e-41	69.1077	48.4929
Dpp10	WT_KO	1.3963	0.276872	6874392	0.569989	4.3867e-25	1.06041e-22	70.7912	56.7671
Ulk4	WT_KO	0.739723	0.291594	7470807	0.61944	1.93973e-77	7.03346e-74	60.3255	34.2494
Unc13c	WT_KO	2.18887	0.296237	6.89966e+06	0.572083	2.16645e-25	5.35606e-23	92.7048	82.0922
Kctd8	WT_KO	1.66735	0.30411	6.90114e+06	0.572206	5.09278e-26	1.38498e-23	78.0303	63.6229

## Sheet: iSPN
feature	group	avgExpr	logFC	statistic	auc	pval	padj	pct_in	pct_out
AC149090.1	WT_KO	0.840425	-0.514133	2442347	0.346941	3.567e-86	3.88019e-82	58.547	74.99
mt-Co3	WT_KO	0.63789	-0.439981	2664169	0.378452	1.82832e-59	6.6295e-56	44.1595	60.2712
mt-Atp6	WT_KO	0.627951	-0.409352	2744428	0.389853	4.81347e-50	8.72682e-47	42.3433	57.5588
Snhg11	WT_KO	3.24983	-0.408487	2587301	0.367532	1.33855e-62	7.28038e-59	98.5399	99.641
Ntrk2	WT_KO	1.14775	-0.309984	2906505	0.412876	1.18587e-28	1.07499e-25	70.7977	73.3945
mt-Co2	WT_KO	0.503983	-0.29948	2917315	0.414412	3.87742e-33	4.21786e-30	36.5741	49.0227
Reln	WT_KO	0.776843	-0.265623	3023107	0.42944	1.48086e-20	5.3696e-18	53.953	58.6757
Rgs20	WT_KO	1.09622	-0.259499	2989808	0.424709	5.87182e-22	2.55495e-19	67.5926	71.1607
Pde7b	WT_KO	3.03031	-0.224422	2.85497e+06	0.405556	1.1069e-32	1.09462e-29	99.0741	98.0854
Zdhhc14	WT_KO	1.3783	-0.221122	2973550	0.4224	1.00559e-22	4.75601e-20	82.7635	80.8935
Sik3	WT_KO	1.31102	-0.211958	3000784	0.426269	1.044e-20	4.05595e-18	80.1638	79.9761
mt-Nd2	WT_KO	0.324985	-0.205081	3080177	0.437547	4.14527e-22	1.87885e-19	25.5698	35.8596
mt-Cytb	WT_KO	0.279915	-0.204811	3085259	0.438268	5.02432e-23	2.6026e-20	22.6852	33.0674
mt-Nd4	WT_KO	0.29891	-0.200324	3092287	0.439267	1.0472e-21	4.38133e-19	24.1453	34.1045
mt-Co1	WT_KO	0.425754	-0.18312	3148685	0.447278	1.56669e-14	1.72146e-12	33.7251	40.4069
Nebl	WT_KO	2.03956	-0.182643	2964907	0.421172	2.81619e-23	1.61234e-20	94.1595	90.7459
Vat1l	WT_KO	0.469574	-0.179543	3.19847e+06	0.45435	1.02142e-10	3.38749e-09	39.3519	42.4412
Slc2a13	WT_KO	1.75523	-0.168227	3.05146e+06	0.433467	4.68869e-17	1.02007e-14	89.708	86.1588
Ctnna3	WT_KO	2.42972	-0.167859	3.07452e+06	0.436742	1.52983e-15	2.44727e-13	96.1895	95.1336
Maml3	WT_KO	0.702461	-0.16236	3252859	0.462076	3.82876e-07	3.21616e-06	51.567	51.6155
Clvs1	WT_KO	1.28906	-0.158609	3.09933e+06	0.440268	3.81866e-14	3.81095e-12	79.2379	77.862
Prkcb	WT_KO	2.63786	-0.156965	3034221	0.431018	3.44357e-18	9.36479e-16	98.0413	96.9685
Lingo2	WT_KO	0.205072	-0.156	3200235	0.454601	3.06861e-15	4.45071e-13	18.5541	25.9673
Ldlrad4	WT_KO	1.53919	-0.154676	3189855	0.453127	2.97947e-09	5.89286e-08	81.339	78.4204
Tle4	WT_KO	1.1073	-0.154525	3172683	0.450687	3.2137e-10	8.85419e-09	72.4359	70.8416
Spred1	WT_KO	0.629884	-0.148517	3183430	0.452214	1.62714e-10	5.06534e-09	50.7479	52.9318
Strbp	WT_KO	1.8896	-0.145293	3064332	0.435296	3.39033e-16	6.04591e-14	92.8063	91.3043
Apoe	WT_KO	0.231905	-0.141787	3.28179e+06	0.466186	1.18566e-08	1.85844e-07	21.7593	26.2465
Mpp7	WT_KO	0.697931	-0.140385	3.24038e+06	0.460303	1.42082e-07	1.42882e-06	54.6652	53.7694
Cst3	WT_KO	0.227192	-0.135867	3329474	0.47296	4.13125e-06	2.29636e-05	21.8661	24.8105
Vmp1	WT_KO	0.514493	-0.135725	3.26817e+06	0.464251	8.38997e-07	6.06822e-06	45.4772	45.2333
Osbpl8	WT_KO	2.01151	-0.134062	3138071	0.445771	7.99119e-12	4.02445e-10	91.6311	90.0279
mt-Nd1	WT_KO	0.215575	-0.128755	3.26246e+06	0.46344	1.03399e-10	3.41877e-09	18.198	24.3319
Trim9	WT_KO	1.21398	-0.126501	3.20816e+06	0.455727	1.8822e-08	2.74636e-07	76.9943	73.8333
Gabarapl2	WT_KO	0.0613789	-0.125537	3.20523e+06	0.45531	8.89376e-26	6.04664e-23	6.73077	15.1576
Dpp6	WT_KO	2.6523	-0.123576	3.03306e+06	0.430853	2.86425e-18	8.1993e-16	98.255	96.2904
Tspan5	WT_KO	0.904881	-0.123528	3231126	0.458989	1.21605e-07	1.25983e-06	65.2778	63.3028
Dgki	WT_KO	3.19554	-0.120932	3087380	0.43857	9.64629e-15	1.1283e-12	99.359	98.564
Bcl2	WT_KO	0.256123	-0.112265	3.32156e+06	0.471836	3.72075e-06	2.11465e-05	24.1809	27.2836
Etv5	WT_KO	0.13282	-0.109545	3282898	0.466344	6.31731e-11	2.21676e-09	14.1026	19.5453
Cacng3	WT_KO	0.736037	-0.109257	3304995	0.469482	5.77697e-05	0.000205817	57.0869	54.8464
Cacnb2	WT_KO	4.03351	-0.10651	3.24747e+06	0.46131	1.07622e-06	7.51868e-06	99.8219	99.8006
Erbb4	WT_KO	0.180362	-0.105878	3.33683e+06	0.474005	6.01299e-07	4.61279e-06	15.1353	19.3857
Gpr63	WT_KO	0.270478	-0.104093	3.36303e+06	0.477726	0.000343703	0.000930743	26.6738	27.9218
Ubash3b	WT_KO	0.0837397	-0.103875	3292191	0.467664	1.38863e-13	1.17097e-11	8.58262	14.4795
Lrrtm3	WT_KO	1.92124	-0.102157	3215705	0.456799	5.0629e-08	6.16043e-07	90.349	88.5122
Spred2	WT_KO	0.505963	-0.100035	3330762	0.473143	0.000177427	0.000528058	43.0199	43.1193
Nkain2	WT_KO	4.22186	0.100041	3.79439e+06	0.539002	8.80786e-07	6.3284e-06	100	99.8404
Ubr3	WT_KO	0.908616	0.100103	3.77892e+06	0.536805	1.77539e-06	1.13872e-05	67.9131	54.4077
Zfp950	WT_KO	0.75328	0.100268	3828754	0.543884	5.98301e-09	1.043e-07	60.6125	47.148
Sil1	WT_KO	0.523861	0.100441	3.88574e+06	0.551979	8.22327e-14	7.4544e-12	45.1211	31.5915
Stag1	WT_KO	1.34073	0.100489	3735489	0.530635	0.000103142	0.000336425	82.1581	72.9557
Mtus2	WT_KO	0.987701	0.100497	3.76647e+06	0.535036	6.05701e-06	3.14052e-05	69.6937	57.3993
Gripap1	WT_KO	0.685715	0.100534	3847407	0.546533	3.66466e-10	9.96605e-09	56.8732	42.5608
Mical3	WT_KO	1.12707	0.100549	3738502	0.531063	7.14306e-05	0.000246127	75.2493	63.4623
Cdk19	WT_KO	0.57195	0.100565	3875990	0.550594	1.49835e-12	9.70184e-11	49.4658	35.3012
Rai1	WT_KO	0.644075	0.100685	3.83836e+06	0.545248	6.89388e-10	1.71214e-08	53.5969	40.6063
Kcna4	WT_KO	0.518018	0.100817	3886142	0.552036	1.01063e-13	8.86581e-12	46.047	31.9505
Nxpe4	WT_KO	0.440338	0.100936	3882587	0.551531	1.02353e-14	1.18446e-12	39.4587	26.6853
Myh10	WT_KO	0.864905	0.101033	3.78139e+06	0.537155	1.2632e-06	8.59355e-06	66.0969	52.4531
Arhgap6	WT_KO	0.48186	0.101386	3887297	0.5522	1.2093e-14	1.37028e-12	41.5242	28.0415
Sv2c	WT_KO	0.991607	0.101463	3.7695e+06	0.535467	4.29453e-06	2.37377e-05	68.0556	55.6841
Trio	WT_KO	1.1916	0.101571	3719736	0.528397	0.000300647	0.000831538	78.5256	67.2118
Golga4	WT_KO	0.610894	0.10185	3854380	0.547524	6.64254e-11	2.3012e-09	52.5641	38.5321
Ylpm1	WT_KO	1.01085	0.10186	3.76519e+06	0.534855	7.38653e-06	3.70081e-05	71.9729	59.4336
Nisch	WT_KO	0.485104	0.101926	3892767	0.552977	1.61388e-14	1.75557e-12	44.1952	30.1157
Fam110b	WT_KO	1.08087	0.102049	3758926	0.533964	1.36132e-05	6.14715e-05	74.2165	62.1061
Ptpn12	WT_KO	0.581327	0.102147	3.86727e+06	0.549355	5.71274e-12	3.04623e-10	49.537	35.9793
Srgap3	WT_KO	1.02214	0.102203	3756531	0.533624	1.49314e-05	6.64853e-05	71.2251	58.7555
Magi2	WT_KO	2.8716	0.102313	3751195	0.532866	3.42655e-05	0.000132412	98.7179	97.2477
Jph4	WT_KO	0.459711	0.102474	3925882	0.557681	2.07524e-17	4.80307e-15	42.735	27.7224
St6galnac5	WT_KO	0.89528	0.102788	3.80311e+06	0.540241	1.13654e-07	1.19222e-06	61.6809	49.6609
Wdr7	WT_KO	0.690351	0.102804	3846392	0.546389	4.04497e-10	1.07846e-08	56.4815	42.6805
Rerg	WT_KO	0.653852	0.102864	3839132	0.545358	3.92128e-10	1.05063e-08	50.9259	38.6917
Pacsin1	WT_KO	0.92953	0.102924	3782672	0.537338	1.31028e-06	8.8648e-06	68.5897	55.2453
Carmil1	WT_KO	0.578674	0.10298	3872499	0.550098	2.35449e-12	1.41982e-10	49.0385	35.4607
Arid1b	WT_KO	1.20418	0.103323	3719023	0.528296	0.000314959	0.000864745	78.7749	66.4938
Atp8a2	WT_KO	0.900598	0.103358	3796867	0.539354	3.06014e-07	2.67324e-06	66.9516	53.5301
Pou2f1	WT_KO	0.588216	0.10362	3871557	0.549964	3.78911e-12	2.16936e-10	50.5698	36.2186
Hdac8	WT_KO	0.868771	0.104169	3.80567e+06	0.540604	1.04818e-07	1.11349e-06	64.2094	51.2166
Smg5	WT_KO	0.468041	0.104295	3.89355e+06	0.553088	5.13599e-15	6.98367e-13	41.8447	28.4005
Ccdc88a	WT_KO	0.950112	0.104477	3.78614e+06	0.53783	9.98512e-07	7.05771e-06	69.2664	56.4819
Plekha6	WT_KO	0.674231	0.104899	3842155	0.545787	5.76571e-10	1.44848e-08	55.3063	42.0024
Luc7l3	WT_KO	0.614144	0.105056	3.86722e+06	0.549348	1.30687e-11	5.87444e-10	52.8134	38.931
Unc5c	WT_KO	1.28289	0.105202	3716136	0.527886	0.000355487	0.000958598	72.6496	64.0207
Ppp1r12a	WT_KO	0.955834	0.105284	3.79104e+06	0.538526	6.45329e-07	4.8885e-06	69.6225	57.0403
Ccdc148	WT_KO	0.483407	0.105749	3885921	0.552004	1.50131e-14	1.68364e-12	41.2749	28.2808
Sgcz	WT_KO	4.92426	0.105948	3937994	0.559401	6.98871e-14	6.61926e-12	99.9288	99.8803
Ptprt	WT_KO	0.724318	0.106123	3.81737e+06	0.542267	8.10417e-09	1.34591e-07	52.6709	41.3243
Cdh2	WT_KO	0.637045	0.106134	3.86929e+06	0.549642	7.29931e-12	3.72779e-10	51.6738	37.6546
Snrnp70	WT_KO	1.06705	0.106222	3.75639e+06	0.533604	1.68467e-05	7.33621e-05	74.537	61.9864
Wdfy3	WT_KO	0.646624	0.106612	3866012	0.549176	1.83966e-11	7.83059e-10	53.9174	39.3299
Zfp638	WT_KO	1.17636	0.106619	3736195	0.530735	8.96948e-05	0.000298744	77.9202	65.7359
Spata13	WT_KO	0.3686	0.10734	3931433	0.558469	1.27182e-20	4.77065e-18	34.4729	20.7419
Stk39	WT_KO	0.499188	0.107499	3890375	0.552637	1.74053e-14	1.8746e-12	43.1624	29.8763
Frmd4b	WT_KO	1.27414	0.107524	3.727e+06	0.529429	0.000178767	0.000531608	78.2407	66.9326
Rbm26	WT_KO	0.9995	0.107727	3.79328e+06	0.538845	5.73209e-07	4.44748e-06	71.2963	59.1145
Prickle2	WT_KO	0.874053	0.108906	3823037	0.543072	1.57957e-08	2.37e-07	63.8889	50.0997
Smarcd3	WT_KO	0.39087	0.10996	3911199	0.555595	6.48435e-18	1.67945e-15	36.396	23.3347
Kcnn2	WT_KO	0.854873	0.110118	3826631	0.543582	9.29537e-09	1.50918e-07	62.3932	48.943
Nedd4	WT_KO	0.850188	0.110168	3829548	0.543996	8.6733e-09	1.42305e-07	65.5271	50.7379
Sptbn4	WT_KO	1.07666	0.110295	3771664	0.535774	4.63416e-06	2.52557e-05	74.6439	61.9465
Mmp16	WT_KO	1.35494	0.111063	3742686	0.531658	5.91065e-05	0.000210005	81.3746	71.3602
Setbp1	WT_KO	1.15633	0.111128	3751997	0.53298	2.5387e-05	0.000103314	76.1752	64.3398
Rps6ka5	WT_KO	0.918366	0.111211	3801198	0.539969	1.77902e-07	1.70654e-06	64.7792	52.6127
Stau2	WT_KO	0.887418	0.111776	3.8173e+06	0.542257	3.63908e-08	4.73571e-07	66.5598	52.4132
Ptbp2	WT_KO	0.519567	0.111944	3916350	0.556327	7.59544e-16	1.25187e-13	46.2251	31.4719
Ogt	WT_KO	1.08724	0.112014	3.78281e+06	0.537357	1.74861e-06	1.12819e-05	75.2493	62.146
Ncoa2	WT_KO	0.987058	0.112317	3795893	0.539216	4.31299e-07	3.51699e-06	71.5812	57.2796
Nrg1	WT_KO	5.17988	0.112717	3954533	0.561751	7.01302e-15	8.76869e-13	100	99.9601
Ankrd11	WT_KO	1.04067	0.112793	3.78203e+06	0.537246	1.77055e-06	1.13763e-05	74.0028	60.1915
Cacna1b	WT_KO	0.797156	0.11282	3844045	0.546056	1.25761e-09	2.85006e-08	62.3932	48.5441
Ints6l	WT_KO	0.475095	0.112942	3944451	0.560319	8.45083e-19	2.62652e-16	43.198	27.8819
Jazf1	WT_KO	0.89334	0.113115	3817527	0.542289	3.3444e-08	4.38847e-07	65.3134	52.2537
Uggt2	WT_KO	0.550854	0.113331	3.90435e+06	0.554622	7.88369e-15	9.52876e-13	46.8305	32.6286
Gsg1l	WT_KO	1.10758	0.113332	3773446	0.536027	3.93895e-06	2.21665e-05	73.9316	62.3055
Ivns1abp	WT_KO	0.616328	0.113596	3.87856e+06	0.550959	1.76064e-12	1.12661e-10	51.3177	37.0164
A830018L16Rik	WT_KO	0.70876	0.114603	3859516	0.548253	5.2383e-11	1.89941e-09	54.4872	40.5664
Tnrc6b	WT_KO	1.14533	0.114755	3.75858e+06	0.533916	1.50945e-05	6.70742e-05	77.5997	64.0606
Catspere2	WT_KO	0.58949	0.115192	3.89472e+06	0.553255	7.30854e-14	6.79507e-12	48.7536	34.4635
Epb41	WT_KO	1.36494	0.11546	3.73157e+06	0.530079	0.000136971	0.000428029	82.4786	71.8787
Stox2	WT_KO	2.67313	0.115628	3.7397e+06	0.531233	8.24217e-05	0.000278097	98.1481	95.5724
Nell1	WT_KO	1.24066	0.115703	3755835	0.533525	1.77902e-05	7.67944e-05	74.359	62.864
Syne1	WT_KO	2.45707	0.116415	3.74128e+06	0.531458	7.31871e-05	0.000251462	97.5427	93.937
Adora2a	WT_KO	0.950121	0.116661	3820827	0.542758	3.16599e-08	4.19996e-07	69.302	55.9234
Dnajc7	WT_KO	0.646761	0.116946	3.90169e+06	0.554245	1.74183e-13	1.40353e-11	55.5912	40.0479
Ahcyl2	WT_KO	1.00468	0.117214	3803083	0.540237	2.09338e-07	1.96139e-06	70.7621	57.2397
Sgk1	WT_KO	1.22543	0.117588	3.77221e+06	0.535852	4.37333e-06	2.40998e-05	73.433	62.6645
Sltm	WT_KO	0.836366	0.117777	3852721	0.547288	5.4798e-10	1.38626e-08	64.2094	49.9003
Rims2	WT_KO	2.5158	0.117871	3.78471e+06	0.537628	2.10122e-06	1.31665e-05	97.3647	94.9342
Scaper	WT_KO	0.837798	0.1181	3.85298e+06	0.547325	5.21097e-10	1.33063e-08	64.067	49.7008
Grin1	WT_KO	1.63678	0.118113	3726230	0.52932	0.000214626	0.000622089	89.9573	81.4918
Dach1	WT_KO	2.40441	0.118258	3746564	0.532208	4.89357e-05	0.000179475	95.2991	91.9426
Trim2	WT_KO	1.20454	0.118475	3764689	0.534783	9.41445e-06	4.5221e-05	78.5969	66.0152
Gabrb1	WT_KO	1.7074	0.119012	3.71912e+06	0.52831	0.000347025	0.000938107	87.0014	78.6996
Nell2	WT_KO	1.0803	0.119142	3.79405e+06	0.538954	5.78411e-07	4.47189e-06	73.255	60.71
2020-03-01	WT_KO	1.02091	0.119343	3.75968e+06	0.534072	5.33401e-06	2.83179e-05	56.0897	47.7862
Ano6	WT_KO	0.708669	0.119448	3.87607e+06	0.550605	9.67526e-12	4.69855e-10	57.1581	42.6007
Abr	WT_KO	0.589176	0.119519	3893425	0.55307	1.3437e-13	1.14193e-11	49.8575	35.7798
Tbc1d8	WT_KO	1.1149	0.119787	3791931	0.538653	7.7967e-07	5.71651e-06	75.9259	63.1432
Ncam1	WT_KO	1.39175	0.120135	3741754	0.531525	6.45898e-05	0.000225629	83.1553	72.1978
Slc35f3	WT_KO	0.954218	0.120461	3819890	0.542625	3.23459e-08	4.25979e-07	68.1624	54.8863
Pou2f2	WT_KO	0.34135	0.120601	3.96541e+06	0.563296	4.13154e-26	2.99619e-23	31.2322	16.9924
Smg6	WT_KO	0.786427	0.120798	3866499	0.549245	6.78018e-11	2.34142e-09	61.859	45.9912
Etnk1	WT_KO	1.0275	0.121034	3.82144e+06	0.542845	3.645e-08	4.73719e-07	72.614	59.274
Thrb	WT_KO	1.62325	0.121127	3738831	0.53111	8.36534e-05	0.000281728	86.0755	76.8648
Astn1	WT_KO	1.19268	0.121157	3766231	0.535002	8.20162e-06	4.04308e-05	78.2764	65.6562
Ano2	WT_KO	0.553255	0.121963	3.90278e+06	0.554399	6.32292e-15	8.09186e-13	45.2635	32.0702
Cntn4	WT_KO	3.32482	0.122049	3.89978e+06	0.553973	1.01919e-11	4.88455e-10	98.7892	98.5241
Nexn	WT_KO	0.629954	0.122166	3914918	0.556123	8.83856e-15	1.04506e-12	51.9587	36.8967
Tspoap1	WT_KO	0.5852	0.122291	3926560	0.557777	9.67926e-16	1.57151e-13	51.1396	35.5804
4930402H24Rik	WT_KO	1.45978	0.122664	3.75e+06	0.532697	3.5155e-05	0.00013556	85.0071	75.3091
Wnk1	WT_KO	0.805938	0.122775	3.869e+06	0.5496	5.86175e-11	2.09063e-09	62.7849	47.3873
Kif1b	WT_KO	1.15506	0.123342	3792922	0.538794	7.42933e-07	5.49397e-06	77.3504	64.3
Ddx17	WT_KO	0.746069	0.123507	3880710	0.551264	8.88421e-12	4.39284e-10	59.9003	45.5126
Rfx3	WT_KO	1.14248	0.123831	3802457	0.540148	2.7335e-07	2.44658e-06	73.6111	63.0634
Esrrg	WT_KO	1.43192	0.123892	3746661	0.532222	4.41781e-05	0.000164466	82.1581	72.7962
Limch1	WT_KO	1.17038	0.125742	3787272	0.537991	1.11174e-06	7.71269e-06	73.7536	61.2286
Frmd5	WT_KO	1.43432	0.126009	3762143	0.534421	1.28965e-05	5.87472e-05	82.8348	72.9557
Galnt18	WT_KO	0.881747	0.126038	3846606	0.54642	9.01829e-10	2.1234e-08	61.9658	48.4643
Kmt2c	WT_KO	0.738858	0.126452	3907315	0.555043	2.07985e-13	1.66358e-11	59.8647	44.2361
Dab1	WT_KO	2.94569	0.127741	3813514	0.541719	1.44792e-07	1.45032e-06	98.3262	96.5696
Fchsd2	WT_KO	0.800813	0.127768	3.88316e+06	0.551613	8.86406e-12	4.39284e-10	62.2863	46.9087
Sema6d	WT_KO	0.996306	0.127854	3815055	0.541938	3.58709e-08	4.68431e-07	62.3932	50.9773
Enox1	WT_KO	2.00102	0.128438	3730653	0.529948	0.000158964	0.000481943	93.9459	87.5947
Pcdh17	WT_KO	0.835397	0.128773	3837330	0.545102	1.29043e-09	2.9123e-08	55.9117	44.1564
Foxp2	WT_KO	1.14284	0.12979	3789494	0.538307	5.56684e-07	4.34405e-06	63.4615	53.8093
Ash1l	WT_KO	1.03574	0.130261	3.83165e+06	0.544295	1.29625e-08	2.00864e-07	73.6111	59.6729
Nalcn	WT_KO	1.44544	0.131314	3773494	0.536034	5.11173e-06	2.72843e-05	85.0071	74.7906
Cntn1	WT_KO	1.71985	0.13143	3742794	0.531673	6.36464e-05	0.000223121	89.6724	80.6143
Pcm1	WT_KO	0.83173	0.131448	3888079	0.552311	6.23649e-12	3.26157e-10	64.3875	48.6239
Elmod1	WT_KO	1.99839	0.131804	3751170	0.532863	3.41069e-05	0.000131987	94.0171	87.5548
Cadm1	WT_KO	0.914936	0.132283	3840654	0.545574	1.61979e-09	3.47536e-08	60.5413	48.1851
Fubp1	WT_KO	0.910624	0.132605	3.86558e+06	0.549115	1.82632e-10	5.54937e-09	68.5185	53.7296
Zfhx3	WT_KO	1.38002	0.133312	3770963	0.535674	5.04024e-06	2.69821e-05	73.7179	64.4994
Strn	WT_KO	1.58687	0.133528	3764338	0.534733	1.13672e-05	5.28379e-05	87.2507	78.0614
Mycbp2	WT_KO	1.91479	0.134897	3.76833e+06	0.5353	8.49642e-06	4.15889e-05	92.8775	86.3183
Tnrc6c	WT_KO	1.61075	0.135042	3.76093e+06	0.534249	1.52369e-05	6.76242e-05	88.8889	79.8564
Gulp1	WT_KO	0.438716	0.135598	3937878	0.559385	8.82962e-21	3.55736e-18	35.1496	21.9785
Plekha5	WT_KO	2.35281	0.136165	3764486	0.534754	1.17945e-05	5.45496e-05	97.151	92.5808
Adam23	WT_KO	1.66295	0.136954	3781488	0.537169	2.67912e-06	1.59825e-05	88.604	80.2553
Egfem1	WT_KO	1.22916	0.136982	3768146	0.535274	3.93757e-06	2.21665e-05	62.3932	54.1284
Nsd1	WT_KO	1.12907	0.137621	3836289	0.544954	9.56994e-09	1.54683e-07	77.7422	63.1831
Slc4a4	WT_KO	2.56491	0.137955	3.76994e+06	0.535529	7.50191e-06	3.75372e-05	97.792	94.0566
Rasgef1b	WT_KO	1.75333	0.138639	3752129	0.532999	3.08934e-05	0.00012163	89.5299	80.016
Gabra2	WT_KO	1.62386	0.139432	3797353	0.539423	6.32243e-07	4.8073e-06	87.4644	78.7794
Adgrb1	WT_KO	0.790153	0.139551	3903603	0.554516	6.13497e-13	4.44908e-11	62.9986	47.0283
Eif4g3	WT_KO	0.69277	0.140415	3953374	0.561586	9.30127e-17	1.90904e-14	57.4074	40.8855
Cntn6	WT_KO	0.746264	0.140598	3925880	0.557681	6.66557e-15	8.43117e-13	56.339	41.803
Sbf2	WT_KO	1.13028	0.141803	3.84492e+06	0.546181	3.51186e-09	6.71136e-08	75.8903	62.3853
Trank1	WT_KO	1.23942	0.14414	3.83052e+06	0.544135	1.88847e-08	2.74636e-07	78.3832	66.055
Sez6	WT_KO	1.15391	0.144652	3841389	0.545679	5.09051e-09	9.13771e-08	75.2493	62.4252
Adk	WT_KO	0.924038	0.144698	3867505	0.549388	8.02212e-11	2.73557e-09	62.5356	49.6211
Gm12394	WT_KO	0.301248	0.146188	4016134	0.570501	2.43694e-36	3.787e-33	27.5285	12.7244
Srrm2	WT_KO	1.24881	0.146893	3823339	0.543114	4.28372e-08	5.41212e-07	81.0541	67.8899
Tmtc1	WT_KO	1.31818	0.147082	3804668	0.540462	2.67298e-07	2.40303e-06	79.8789	67.7702
Lrba	WT_KO	1.24631	0.147394	3823742	0.543172	3.9459e-08	5.05577e-07	80.3419	65.9354
Kcnb2	WT_KO	1.01679	0.14754	3849426	0.54682	8.43236e-10	2.02042e-08	63.3903	51.6155
Myo3b	WT_KO	0.594163	0.148484	3917001	0.556419	5.54354e-17	1.1824e-14	40.6695	27.9617
Rit2	WT_KO	1.29318	0.150118	3821239	0.542816	5.14648e-08	6.24118e-07	79.9858	67.0124
Rabgap1l	WT_KO	1.85083	0.15123	3824843	0.543328	4.61318e-08	5.75484e-07	92.4858	84.9222
4930578G10Rik	WT_KO	0.419897	0.151407	3968313	0.563708	2.48064e-24	1.58732e-21	34.0812	20.6223
Tenm3	WT_KO	1.62051	0.151891	3770794	0.53565	5.93712e-06	3.09755e-05	79.7009	70.2034
Med12l	WT_KO	0.845836	0.153383	3944069	0.560264	2.04428e-15	3.1768e-13	64.0313	47.3474
Frmd4a	WT_KO	1.8157	0.153724	3774544	0.536183	4.93802e-06	2.65605e-05	90.4558	81.0929
Grm3	WT_KO	1.94416	0.154725	3770515	0.535611	6.85053e-06	3.46928e-05	87.3575	80.2154
Sorcs2	WT_KO	1.47402	0.154795	3807658	0.540887	2.2076e-07	2.04203e-06	83.6538	72.158
Etl4	WT_KO	1.61916	0.15519	3814602	0.541873	1.12443e-07	1.18408e-06	82.1225	74.1923
Sesn3	WT_KO	0.910749	0.156768	3.93827e+06	0.55944	8.25003e-15	9.86196e-13	66.4174	50.8576
Phc2	WT_KO	1.06675	0.157785	3.88862e+06	0.552388	1.71424e-11	7.39982e-10	73.7536	58.9549
Rbm39	WT_KO	1.50162	0.1578	3.85323e+06	0.54736	2.11769e-09	4.36293e-08	86.859	75.9473
Iqgap2	WT_KO	0.66169	0.158383	3991681	0.567028	1.90712e-20	6.69214e-18	52.6353	35.8995
Cntnap5b	WT_KO	1.82285	0.159807	3778741	0.536779	3.31765e-06	1.91558e-05	86.5028	76.785
Iqsec1	WT_KO	1.46543	0.161983	3816044	0.542078	9.44036e-08	1.01978e-06	82.3362	70.8815
Gucy1b1	WT_KO	0.780008	0.162672	3981986	0.565651	1.98596e-18	5.83873e-16	60.755	43.2788
Dtna	WT_KO	1.13427	0.163277	3.90175e+06	0.554253	3.89396e-12	2.214e-10	75.8903	61.7471
Thsd7a	WT_KO	2.42908	0.16478	3805710	0.54061	3.02791e-07	2.65412e-06	92.4501	87.6346
Upp2	WT_KO	0.915813	0.164985	3.94241e+06	0.560029	3.59526e-15	5.07912e-13	64.9217	49.8604
Msra	WT_KO	1.32411	0.165139	3864559	0.54897	4.73672e-10	1.221e-08	79.8433	67.6107
Nkain3	WT_KO	1.19524	0.167502	3851305	0.547087	1.00164e-09	2.34319e-08	66.453	56.4819
Dnmt3a	WT_KO	1.50504	0.170084	3867098	0.549331	4.39007e-10	1.15073e-08	86.5385	75.1097
Ndrg4	WT_KO	1.12497	0.170325	3913148	0.555872	8.42924e-13	5.95411e-11	75.8191	60.6701
Ube2e2	WT_KO	1.72172	0.172137	3870816	0.549859	3.05599e-10	8.54577e-09	89.2806	80.0558
Pcdh11x	WT_KO	1.15355	0.174834	3879176	0.551046	3.70571e-11	1.43703e-09	66.8091	57.1201
Smyd3	WT_KO	1.45835	0.179092	3.87395e+06	0.550304	1.77648e-10	5.46021e-09	82.3718	71.2405
Npas2	WT_KO	1.56332	0.180461	3.8722e+06	0.550055	2.43171e-10	7.05981e-09	86.396	75.1895
Syndig1	WT_KO	1.04663	0.181428	3963737	0.563058	4.05899e-16	7.12156e-14	71.8661	55.7639
Zbtb20	WT_KO	2.1357	0.184103	3.84177e+06	0.545732	7.90764e-09	1.31729e-07	90.349	84.5632
Arglu1	WT_KO	1.13245	0.18476	3966845	0.5635	4.38431e-16	7.57024e-14	76.2821	60.71
Klhl1	WT_KO	0.611462	0.186292	4009442	0.569551	2.80008e-24	1.69218e-21	43.3761	28.7595
Trpm3	WT_KO	1.0517	0.187409	3852715	0.547287	1.2736e-10	4.07475e-09	52.7066	42.7204
Ptprm	WT_KO	1.47414	0.193933	3916939	0.556411	8.58343e-13	6.02391e-11	83.4758	70.9613
Ddx5	WT_KO	1.4574	0.197539	3944475	0.560322	2.27646e-14	2.38109e-12	86.1467	73.4743
Jakmip1	WT_KO	1.70125	0.206809	3931163	0.558431	1.58069e-13	1.29483e-11	89.245	78.6598
Clasp2	WT_KO	1.10999	0.211063	4018815	0.570882	8.88238e-20	3.01946e-17	74.2165	58.7156
Dtnb	WT_KO	1.85393	0.213473	3946210	0.560569	2.11808e-14	2.23694e-12	91.7379	82.0901
Ror1	WT_KO	0.694587	0.214424	4.07417e+06	0.578746	1.77703e-28	1.48696e-25	50.0356	32.868
Hs3st4	WT_KO	1.77137	0.221016	3936679	0.559215	7.0927e-14	6.65124e-12	86.5385	77.0642
Asic2	WT_KO	2.58191	0.229325	3.88253e+06	0.551522	8.10798e-11	2.74762e-09	92.3433	86.3981
Dpp10	WT_KO	1.44229	0.242413	3.95217e+06	0.561415	3.04593e-15	4.45071e-13	71.9017	60.8696
Cntnap5a	WT_KO	1.40424	0.250791	3984242	0.565971	2.22892e-17	5.05129e-15	71.9729	59.7926
Ulk4	WT_KO	0.612606	0.250839	4.27901e+06	0.607844	1.01718e-52	2.76623e-49	51.9587	28.0814
Kctd8	WT_KO	1.60107	0.279433	3990616	0.566877	1.13694e-17	2.81082e-15	74.6083	62.6645
Sema3a	WT_KO	0.692185	0.292099	4.25616e+06	0.604598	2.56422e-50	5.57872e-47	49.7507	28.56
Unc13c	WT_KO	1.89476	0.318933	4.06634e+06	0.577633	9.6778e-23	4.75601e-20	88.4259	74.6709

## Sheet: Astroglia
feature	group	avgExpr	logFC	statistic	auc	pval	padj	pct_in	pct_out
Snhg11	WT_KO	0.554674	-0.539771	820830	0.350512	3.0806e-50	3.35108e-46	44.767	63.4433
Lrp1b	WT_KO	0.890839	-0.457605	886109	0.378388	2.58183e-32	9.3617e-29	59.893	68.9212
mt-Co3	WT_KO	0.309624	-0.398601	925440	0.395183	1.78388e-31	4.85126e-28	26.2032	42.2582
Ptprd	WT_KO	0.94858	-0.32061	931266	0.397671	6.23172e-23	1.35577e-19	70.2063	72.3868
mt-Atp6	WT_KO	0.314604	-0.287615	1002907	0.428263	2.65493e-16	2.40669e-13	27.1963	36.8362
Kcnip4	WT_KO	0.5985	-0.258036	1007079	0.430045	1.07538e-12	3.16162e-10	46.6769	52.4874
Nrg3	WT_KO	0.23958	-0.249191	1001768	0.427777	4.95819e-18	5.99279e-15	21.696	33.147
mt-Co2	WT_KO	0.238267	-0.2471	1.01629e+06	0.433977	1.01896e-15	8.52638e-13	21.2376	31.526
Kcnd2	WT_KO	0.77086	-0.239137	1.02758e+06	0.438801	1.22857e-09	1.12306e-07	55.7678	57.6859
Syt1	WT_KO	0.317108	-0.233533	1021098	0.436031	5.73737e-13	1.95035e-10	29.4118	37.6188
Dlg2	WT_KO	0.726012	-0.230868	1025866	0.438067	8.29103e-10	8.35091e-08	55.9206	58.5243
mt-Co1	WT_KO	0.20668	-0.221316	1031049	0.44028	4.88829e-14	2.41704e-11	19.0222	28.5075
Cntnap2	WT_KO	0.353038	-0.216072	1033642	0.441388	7.40454e-11	1.20219e-08	31.6272	38.7367
Gria2	WT_KO	1.1735	-0.209316	1015121	0.433479	1.68622e-10	2.37485e-08	73.7204	75.1258
Nrxn3	WT_KO	0.856982	-0.203315	1032029	0.440699	6.66159e-09	4.36535e-07	62.3377	62.9961
Cst3	WT_KO	0.937813	-0.196796	1069212	0.456577	2.34012e-05	0.000292595	65.9282	63.6669
AC149090.1	WT_KO	0.137105	-0.187247	1049229	0.448044	1.06714e-12	3.16162e-10	14.8205	23.3091
Wdr17	WT_KO	2.15087	-0.183814	1.01557e+06	0.433669	2.65836e-10	3.42664e-08	93.8121	92.2303
Fgf14	WT_KO	1.20169	-0.179803	1046059	0.44669	3.00748e-07	9.45532e-06	73.644	73.8401
Rgs7	WT_KO	0.944555	-0.17492	1.04131e+06	0.444662	6.90048e-08	2.92076e-06	64.3239	64.2817
Sgcz	WT_KO	0.375879	-0.172352	1074029	0.458634	4.22851e-06	7.69193e-05	33.5371	37.1716
mt-Cytb	WT_KO	0.107781	-0.169175	1.06322e+06	0.454018	3.26729e-12	8.46227e-10	10.6952	18.8932
Rbfox1	WT_KO	0.568495	-0.166236	1076020	0.459484	3.00034e-05	0.00036024	46.6769	47.9598
Atp2b1	WT_KO	0.550267	-0.16596	1075394	0.459217	2.78232e-05	0.000339306	48.2047	47.7362
mt-Nd2	WT_KO	0.132248	-0.160682	1.07703e+06	0.459915	3.4029e-09	2.45144e-07	12.5286	19.3404
Kcnq5	WT_KO	0.230344	-0.156039	1073867	0.458565	2.09642e-07	6.93156e-06	21.6196	27.4455
Pcp4	WT_KO	0.158096	-0.152886	1090380	0.465616	1.57357e-06	3.53662e-05	15.89	20.9614
Snap25	WT_KO	0.19005	-0.149322	1.09047e+06	0.465655	5.05432e-06	8.93998e-05	18.6402	23.365
Ubb	WT_KO	0.148401	-0.147415	1084000	0.462892	1.19945e-07	4.45311e-06	14.4385	20.3466
Lingo2	WT_KO	0.156049	-0.14599	1072018	0.457775	4.72027e-09	3.16957e-07	15.1261	22.0794
Hspa8	WT_KO	0.191713	-0.144791	1.09462e+06	0.467428	1.54611e-05	0.000211289	18.9458	23.2532
Tmsb4x	WT_KO	0.144895	-0.143554	1098499	0.469083	9.14133e-06	0.000142265	14.9733	19.5081
Kcnh7	WT_KO	0.103512	-0.142144	1073869	0.458565	9.45704e-11	1.46962e-08	10.0076	17.4958
Nav3	WT_KO	0.152862	-0.142038	1083415	0.462642	1.09733e-07	4.14798e-06	14.4385	20.626
Cntn1	WT_KO	0.301582	-0.135117	1089226	0.465123	3.65629e-05	0.000419548	26.9672	31.0788
Bsg	WT_KO	0.08681	-0.134242	1.09799e+06	0.468866	2.5234e-07	8.07339e-06	9.47288	14.7568
Cntn5	WT_KO	0.244637	-0.134	1093893	0.467116	4.40637e-05	0.000478842	23.3002	27.2219
Celf2	WT_KO	1.68402	-0.133359	1033814	0.441461	2.43708e-08	1.27454e-06	91.7494	87.7026
Tspan7	WT_KO	1.40845	-0.131191	1062121	0.453549	8.74503e-06	0.000137469	79.3736	77.5293
Plcb1	WT_KO	1.27961	-0.126887	1074337	0.458765	7.54445e-05	0.00073876	75.0955	74.5668
Mdga2	WT_KO	1.8373	-0.126139	1066970	0.455619	2.31348e-05	0.000289931	86.0199	85.5785
mt-Nd4	WT_KO	0.127684	-0.125719	1088233	0.464699	8.90903e-08	3.52409e-06	11.8411	18.0548
Ralyl	WT_KO	0.0715927	-0.113932	1.09094e+06	0.465857	1.39919e-09	1.25471e-07	7.02827	13.4153
Fam155a	WT_KO	0.11204	-0.110943	1097113	0.468491	4.72116e-07	1.35506e-05	10.3132	15.9866
Pcsk1n	WT_KO	0.0660809	-0.100435	1113663	0.475558	6.11404e-06	0.000104409	7.25745	11.5707
Cck	WT_KO	0.0235277	-0.100295	1104490	0.471641	1.89865e-11	4.04868e-09	2.52101	8.04919
Atxn7	WT_KO	0.324777	0.100063	1.30786e+06	0.558484	7.09032e-14	3.33421e-11	31.1688	17.9989
1110051M20Rik	WT_KO	0.500513	0.10205	1304943	0.557239	2.80684e-10	3.46964e-08	45.6073	30.1845
Gramd3	WT_KO	0.523454	0.102263	1.29436e+06	0.552718	9.78407e-09	5.94587e-07	46.2949	32.6439
Zfp608	WT_KO	0.596838	0.102654	1287937	0.549977	1.14117e-07	4.29539e-06	50.0382	36.2214
Map4k4	WT_KO	0.472457	0.103119	1296932	0.553818	1.80544e-09	1.51073e-07	42.7044	29.4578
Tprkb	WT_KO	0.623301	0.103296	1289414	0.550608	8.08253e-08	3.26847e-06	50.191	36.3331
Acss1	WT_KO	0.518297	0.104502	1301188	0.555636	1.40719e-09	1.25471e-07	46.5241	32.3644
Tspan9	WT_KO	0.433037	0.105027	1311624	0.560092	5.01622e-12	1.26899e-09	40.7181	25.7686
Mapk4	WT_KO	0.648249	0.105887	1293140	0.552199	5.63331e-08	2.50119e-06	54.6982	38.7367
Jmjd1c	WT_KO	0.543743	0.106536	1.29958e+06	0.55495	3.44995e-09	2.46456e-07	48.5867	33.7619
Peli2	WT_KO	0.374302	0.106835	1308755	0.558867	7.02416e-13	2.31542e-10	34.9121	21.0732
Nfat5	WT_KO	0.619372	0.108756	1.30577e+06	0.557592	1.6357e-09	1.42345e-07	53.4759	37.5629
Kif21a	WT_KO	0.494588	0.109209	1296982	0.55384	1.58372e-09	1.40063e-07	42.1696	29.2342
Dkk3	WT_KO	0.366813	0.109942	1307792	0.558456	4.41995e-13	1.60267e-10	33.3843	20.1789
Tnfrsf19	WT_KO	0.471281	0.111269	1303119	0.55646	1.07088e-10	1.6275e-08	40.4125	26.8306
Nr3c2	WT_KO	0.780672	0.11453	1286561	0.54939	6.0547e-07	1.64247e-05	60.4278	45.6121
Adk	WT_KO	0.799478	0.114856	1284281	0.548416	1.22532e-06	2.93144e-05	63.2544	47.3449
Akt3	WT_KO	0.719704	0.114993	1293466	0.552338	9.88773e-08	3.81414e-06	59.0527	43.3203
Ncoa1	WT_KO	0.881314	0.115102	1.27717e+06	0.545379	7.36127e-06	0.000119874	67.3797	52.2079
Gm12394	WT_KO	0.244634	0.117649	1315927	0.561929	1.39404e-20	2.5274e-17	23.3002	10.2292
Dab1	WT_KO	0.858418	0.11941	1.28211e+06	0.547491	2.28211e-06	4.66631e-05	65.3934	49.3013
Eif4g3	WT_KO	0.498319	0.119998	1322025	0.564533	9.50972e-13	2.95562e-10	45.4545	29.5696
Wwc1	WT_KO	0.574532	0.120134	1306583	0.557939	5.59181e-10	6.14422e-08	49.427	34.3208
Nxn	WT_KO	0.490392	0.120549	1.31132e+06	0.559962	1.24191e-11	2.75703e-09	42.0168	27.8368
Ptpn12	WT_KO	0.350698	0.126002	1338176	0.57143	5.89591e-19	9.16225e-16	34.6066	18.6696
Dock4	WT_KO	0.975109	0.127341	1276993	0.545304	8.86597e-06	0.000138768	69.9771	55.2264
Pygb	WT_KO	0.591653	0.127471	1315099	0.561576	7.01845e-11	1.15677e-08	51.5661	35.6624
Kmt2c	WT_KO	0.651225	0.12844	1.31392e+06	0.561071	2.72072e-10	3.42664e-08	56.5317	39.4634
Glis3	WT_KO	0.835009	0.128758	1287345	0.549724	6.64272e-07	1.77542e-05	63.2544	48.4628
Itpr2	WT_KO	0.469555	0.129516	1.32931e+06	0.567643	3.32043e-14	1.71998e-11	44.0031	27.8368
Sybu	WT_KO	0.670069	0.129634	1311390	0.559992	5.04759e-10	5.70107e-08	55.8442	39.128
Dennd1a	WT_KO	1.04854	0.129671	1272758	0.543495	2.38241e-05	0.00029652	74.9427	59.4746
Rfx4	WT_KO	0.574394	0.131872	1320323	0.563807	8.51924e-12	2.05938e-09	49.9618	33.9296
Gm973	WT_KO	0.694859	0.132248	1302725	0.556292	6.12861e-09	4.06506e-07	55.0802	40.9167
Hdac9	WT_KO	0.876244	0.132652	1293377	0.5523	1.48327e-07	5.29015e-06	61.8029	47.1213
Hivep3	WT_KO	0.974946	0.133526	1280127	0.546642	4.60863e-06	8.27272e-05	69.2131	54.6115
Phlpp1	WT_KO	1.09371	0.136225	1271625	0.543012	3.05208e-05	0.000365242	75.7066	61.0956
Lpp	WT_KO	0.611437	0.139013	1330406	0.568112	8.08732e-13	2.58747e-10	54.3163	35.7742
Grk3	WT_KO	0.685872	0.139629	1313605	0.560938	3.3427e-10	3.99581e-08	56.3025	40.6372
Eda	WT_KO	0.616682	0.140855	1313784	0.561014	3.68089e-11	6.78655e-09	47.5936	32.4203
Magi1	WT_KO	0.543139	0.142238	1336211	0.570591	9.26831e-15	6.72138e-12	47.3644	29.7932
Acsl3	WT_KO	0.970147	0.144926	1294743	0.552883	2.08375e-07	6.91067e-06	70.6646	53.9966
Foxn3	WT_KO	0.700126	0.14806	1322858	0.564889	2.42542e-11	4.79705e-09	57.4484	40.4136
Arhgef12	WT_KO	0.900971	0.148676	1299523	0.554925	5.37641e-08	2.40677e-06	67.2269	50.9223
Nckap5	WT_KO	1.05196	0.156955	1288317	0.550139	9.7913e-07	2.4485e-05	73.1856	56.2884
Meis2	WT_KO	1.16459	0.157238	1280613	0.54685	5.76727e-06	9.91096e-05	77.3109	61.5428
Ddhd1	WT_KO	0.882055	0.161563	1314807	0.561451	1.06255e-09	9.96415e-08	67.0741	49.5808
Pou2f1	WT_KO	0.649161	0.163565	1.34751e+06	0.575415	2.5505e-15	1.98174e-12	55.0038	35.886
Stox2	WT_KO	1.21284	0.16606	1283897	0.548252	3.14661e-06	6.04749e-05	78.2277	63.2197
B3galt1	WT_KO	1.98116	0.166543	1.27134e+06	0.542888	4.35859e-05	0.000474875	92.5134	84.6842
Rgs6	WT_KO	1.33893	0.168368	1281287	0.547137	5.31139e-06	9.28895e-05	76.7762	64.6171
Fars2	WT_KO	1.00181	0.16962	1.30642e+06	0.557871	1.14925e-08	6.6853e-07	68.2964	52.6551
Grid2	WT_KO	1.99133	0.169796	1.27118e+06	0.542823	4.45985e-05	0.000482729	91.2147	84.0134
Hdac8	WT_KO	1.34149	0.177153	1288897	0.550387	1.25209e-06	2.9869e-05	80.5959	67.0766
4930402H24Rik	WT_KO	1.31868	0.177885	1291842	0.551645	7.05031e-07	1.85249e-05	82.4293	68.4181
Pbx1	WT_KO	1.94667	0.178909	1274454	0.54422	2.48622e-05	0.000306982	91.673	82.6719
Pard3b	WT_KO	0.779544	0.179639	1338150	0.571419	3.34755e-13	1.25568e-10	60.1222	42.0906
Adam23	WT_KO	0.684761	0.186331	1357224	0.579564	5.25405e-17	5.71536e-14	54.7746	34.8239
Srgap3	WT_KO	0.799631	0.18903	1.34828e+06	0.575744	1.79455e-14	9.76055e-12	62.4905	43.3762
Bmpr1b	WT_KO	0.819305	0.193096	1.34865e+06	0.575903	1.7876e-14	9.76055e-12	62.796	44.047
Igf1r	WT_KO	0.673645	0.196683	1366189	0.583392	8.34663e-19	1.13493e-15	53.7815	33.2588
Wwox	WT_KO	0.712273	0.197257	1340692	0.572505	1.50961e-14	9.12306e-12	51.8717	35.1034
Gpc6	WT_KO	1.28413	0.197637	1308677	0.558834	1.34243e-08	7.56628e-07	77.2345	64.5053
Clasp2	WT_KO	0.93383	0.199176	1345637	0.574616	1.68069e-13	6.77133e-11	68.7548	51.1459
Rgs20	WT_KO	1.90581	0.203137	1.29392e+06	0.552531	5.49612e-07	1.51864e-05	92.1314	82.8396
4930578G10Rik	WT_KO	0.425091	0.213505	1405442	0.600154	3.32676e-36	1.80943e-32	37.3568	15.763
Farp1	WT_KO	1.31906	0.225905	1.32975e+06	0.567831	6.73299e-11	1.12679e-08	81.2834	66.294
Zbtb20	WT_KO	2.86171	0.230255	1337943	0.571331	1.1015e-11	2.54939e-09	99.618	95.7518
Dtna	WT_KO	2.1331	0.265506	1360305	0.58088	1.30612e-14	8.86058e-12	95.4927	86.6965
Msi2	WT_KO	2.53751	0.288666	1360182	0.580827	1.38472e-14	8.86058e-12	97.5554	91.0006

## Sheet: Oligodendrocyte
feature	group	avgExpr	logFC	statistic	auc	pval	padj	pct_in	pct_out
Snhg11	WT_KO	0.659008	-0.27028	2297240	0.417326	8.29153e-25	2.16003e-21	48.4794	59.7592
mt-Co3	WT_KO	0.296312	-0.199449	2.41717e+06	0.439112	1.45061e-19	1.97247e-16	23.8957	34.0191
Celf2	WT_KO	0.700608	-0.191557	2.40631e+06	0.437141	7.87338e-15	5.66337e-12	51.593	59.8093
mt-Atp6	WT_KO	0.259503	-0.188665	2425982	0.440714	8.35661e-20	1.29862e-16	21.2889	31.6106
Lsamp	WT_KO	0.722142	-0.185412	2427800	0.441044	2.80858e-13	1.52759e-10	50.8689	59.2574
Nrg3	WT_KO	0.239478	-0.156313	2450476	0.445163	6.68094e-18	8.07503e-15	19.8045	29.9548
Nrxn1	WT_KO	0.386872	-0.148094	2.49018e+06	0.452376	3.56896e-11	1.55293e-08	31.2455	38.9363
Cacna2d1	WT_KO	0.121526	-0.146086	2464363	0.447686	6.04221e-23	1.09545e-19	11.0427	21.0236
mt-Co2	WT_KO	0.200052	-0.145705	2481850	0.450863	2.7716e-16	2.51246e-13	16.9442	25.8404
Kcnip4	WT_KO	0.480348	-0.145115	2.49551e+06	0.453344	6.80882e-10	2.17842e-07	38.0521	44.9574
Negr1	WT_KO	0.421338	-0.144254	2483759	0.45121	3.30304e-11	1.4971e-08	33.8885	41.6458
Cntn5	WT_KO	0.225127	-0.135114	2.48476e+06	0.451391	1.16474e-14	7.45294e-12	19.7321	28.4997
Grm7	WT_KO	0.71471	-0.133766	2552202	0.463643	3.74851e-06	0.000411975	45.8364	50.6774
Csmd1	WT_KO	0.376626	-0.133221	2509413	0.45587	5.83645e-10	1.92391e-07	30.4852	37.4812
Cntnap2	WT_KO	0.360613	-0.127849	2502027	0.454528	1.14001e-10	4.42892e-08	28.9645	37.13
mt-Co1	WT_KO	0.18022	-0.126882	2518038	0.457437	1.85521e-13	1.06216e-10	15.496	23.3818
Adgrb3	WT_KO	0.595478	-0.122221	2552579	0.463712	2.84523e-06	0.000325794	43.0485	47.9177
Ank2	WT_KO	1.72695	-0.119946	2512769	0.45648	2.8648e-07	5.21593e-05	88.8487	89.714
Pde4b	WT_KO	3.54996	-0.117443	2438325	0.442956	1.78378e-11	8.4365e-09	99.7828	99.6488
Snap25	WT_KO	0.191789	-0.113355	2547700	0.462826	1.84783e-10	6.48409e-08	16.365	23.131
Kcnd2	WT_KO	0.516662	-0.113342	2548771	0.46302	1.35093e-06	0.000183163	40.6951	45.8605
Nrxn3	WT_KO	0.600724	-0.107418	2560314	0.465117	8.64177e-06	0.000819668	45.2571	50.2258
Syt1	WT_KO	0.347452	-0.102964	2555304	0.464207	2.44742e-07	4.80059e-05	28.168	34.3201
AC149090.1	WT_KO	0.0984718	-0.100817	2552984	0.463785	5.98991e-14	3.6199e-11	9.30485	16.2067
Lrp1b	WT_KO	2.78034	0.101807	2.99087e+06	0.543333	3.27593e-07	5.65644e-05	98.1535	98.2439
Dst	WT_KO	0.931858	0.110996	2969902	0.539524	1.72896e-06	0.000221266	66.7994	57.2504
Plp1	WT_KO	2.35912	0.120738	2967873	0.539156	3.93557e-06	0.000423873	96.6329	94.3302
Dock9	WT_KO	0.516486	0.123476	3.03274e+06	0.55094	5.50562e-12	2.72228e-09	42.3244	31.4099
Shtn1	WT_KO	0.853252	0.126147	3009593	0.546735	9.78856e-09	2.53524e-06	61.6582	51.43
Lama2	WT_KO	0.407471	0.126436	3048584	0.553818	1.54697e-15	1.20199e-12	33.092	21.8766
Cdh2	WT_KO	0.452707	0.13551	3.08682e+06	0.560764	1.30227e-17	1.41661e-14	38.7762	25.5896
Slc24a2	WT_KO	3.11314	0.140762	3.03714e+06	0.551739	1.07723e-09	3.19186e-07	99.2397	98.3442
Adamtsl1	WT_KO	0.533592	0.14084	3067084	0.557179	8.33002e-15	5.66337e-12	42.3968	30.2559
Limch1	WT_KO	1.06443	0.163639	3.05183e+06	0.554407	5.93297e-11	2.39033e-08	70.4562	59.1069
Dpp6	WT_KO	0.448136	0.165508	3150609	0.572352	9.92845e-25	2.16003e-21	38.6314	23.5324
Clasp2	WT_KO	1.24979	0.16646	3.07166e+06	0.55801	5.03151e-12	2.60632e-09	75.9594	68.9413
Ndst4	WT_KO	0.349768	0.255445	3288420	0.597388	2.12275e-61	2.30913e-57	27.5887	8.73056
Pcdh9	WT_KO	4.31087	0.306613	3444437	0.62573	1.12891e-49	6.14011e-46	100	99.8996
