# Supplementary material for: Interleukin-6 deficiency exacerbates Huntington’s disease model phenotypes
Source: Mol Neurodegener. 2020 May 24;15:29. doi: 10.1186/s13024-020-00379-3 (PMC7247164; doi:10.1186/s13024-020-00379-3)
Supplement: Supplementary file 1 — Additional file 1: Supplementary materials. [file 13024_2020_379_MOESM1_ESM.zip › 13024_2020_379_MOESM1_ESM/Table S2_R62_KO_vs_R62_WT_042120.xlsx]

## Sheet: dSPN
feature	group	avgExpr	logFC	statistic	auc	pval	padj	pct_in	pct_out
Fam155a	R62_KO	1.96067	-0.495058	4.12449e+06	0.379131	1.37051e-64	1.19793e-61	81.7721	91.3292
Cfap54	R62_KO	0.30023	-0.419648	3.9153e+06	0.359902	1.82839e-111	1.0388e-107	25.2283	49.1166
Ralyl	R62_KO	1.81127	-0.409761	4.22175e+06	0.388071	1.3095e-55	7.4399e-53	84.4099	92.0902
Dpp6	R62_KO	2.86678	-0.398719	3519632	0.323531	3.15352e-135	3.58334e-131	99.256	99.7825
Fam126a	R62_KO	0.157224	-0.311765	4.19383e+06	0.385505	1.71142e-96	6.48229e-93	13.933	35.5531
Erbb4	R62_KO	1.16429	-0.308544	4626727	0.425297	1.31233e-26	1.39364e-24	61.2445	71.0247
Cdh18	R62_KO	2.63336	-0.302023	4502824	0.413908	1.4414e-33	2.87344e-31	95.164	97.5537
Egfem1	R62_KO	1.76955	-0.284548	4678759	0.43008	6.92874e-23	5.42974e-21	77.4095	81.0818
Lsamp	R62_KO	4.92084	-0.269747	3963682	0.364349	1.06494e-80	1.72871e-77	100	100
Zfp804a	R62_KO	1.21919	-0.265304	4530601	0.416461	4.73977e-32	8.41532e-30	73.5881	80.5926
Nkain2	R62_KO	4.23909	-0.262449	3835253	0.352544	5.20254e-95	1.47791e-91	100	100
Kctd16	R62_KO	2.90359	-0.260087	4.35834e+06	0.400627	3.78449e-44	1.22866e-41	98.8164	99.1302
Gabrg3	R62_KO	3.11765	-0.255687	4.29295e+06	0.394616	1.97508e-49	8.97714e-47	99.256	99.7282
Dmd	R62_KO	2.38712	-0.255177	4434202	0.4076	2.08962e-38	5.27653e-36	96.1109	97.9342
Nrxn1	R62_KO	3.64021	-0.252074	3917881	0.360139	1.14778e-85	2.17371e-82	99.9662	100
Ntrk2	R62_KO	1.54234	-0.246259	4562768	0.419418	1.13636e-29	1.63449e-27	83.8688	90.2963
Robo1	R62_KO	3.72639	-0.243517	4201520	0.386212	2.48491e-57	1.56867e-54	99.8647	99.9456
Hs3st5	R62_KO	1.17869	-0.240072	4622943	0.42495	2.82643e-26	2.9197e-24	70.7136	79.1519
Mgat4c	R62_KO	2.74947	-0.235509	4.53043e+06	0.416446	1.02691e-31	1.768e-29	97.2607	98.5594
Thrb	R62_KO	1.52854	-0.228912	4.6717e+06	0.429432	3.51889e-23	2.85608e-21	81.4677	86.3006
Gpc6	R62_KO	1.69704	-0.227792	4803452	0.441542	2.04146e-16	9.24187e-15	79.8783	85.0775
Dscaml1	R62_KO	0.562288	-0.224818	4645154	0.426991	1.78395e-28	2.38483e-26	41.4948	52.4327
Kctd8	R62_KO	1.49476	-0.222067	4808712	0.442026	2.91565e-16	1.3147e-14	74.7717	79.8858
Tenm1	R62_KO	1.17592	-0.220898	4.68283e+06	0.430455	9.27491e-23	7.21855e-21	72.0325	79.6412
2020-03-01	R62_KO	0.472118	-0.220028	4.74722e+06	0.436374	1.58164e-24	1.44937e-22	31.9242	42.9465
Grm3	R62_KO	1.18769	-0.216765	4711041	0.433048	3.15681e-21	2.21425e-19	71.8296	78.9345
Erc2	R62_KO	2.9973	-0.216233	4303824	0.395616	1.56869e-48	6.85578e-46	99.5942	99.701
Xkr4	R62_KO	2.39578	-0.213675	4.54633e+06	0.417908	1.13036e-30	1.766e-28	97.2946	98.2332
Tnr	R62_KO	1.60681	-0.213017	4.63575e+06	0.426127	3.46022e-25	3.36056e-23	86.4728	90.2963
Rora	R62_KO	3.85783	-0.21254	4.20724e+06	0.386738	8.0803e-57	4.83244e-54	99.9324	100
Rnf150	R62_KO	1.58147	-0.208353	4602047	0.423029	3.29913e-27	3.7488e-25	86.8786	89.2634
Ncam2	R62_KO	2.42468	-0.206714	4693319	0.431419	6.67565e-22	4.86253e-20	95.7727	97.0372
Klhl7	R62_KO	0.715462	-0.204734	4597978	0.422655	5.55669e-29	7.60731e-27	56.1042	65.7244
Pde4b	R62_KO	1.4969	-0.197724	4.91147e+06	0.451472	7.5713e-12	1.91184e-10	74.8055	79.2063
Magi2	R62_KO	3.66708	-0.197559	4.25045e+06	0.390709	4.98607e-53	2.57531e-50	99.9324	100
Galnt13	R62_KO	2.68415	-0.196074	4546354	0.417909	1.13454e-30	1.766e-28	98.6473	99.2389
Dclk1	R62_KO	1.6939	-0.194057	4694557	0.431532	7.52498e-22	5.44626e-20	88.9415	92.1446
Lrrtm4	R62_KO	4.02045	-0.193164	4593365	0.422231	1.06787e-27	1.33343e-25	99.3236	99.402
Cntnap5a	R62_KO	2.09993	-0.192769	4.75078e+06	0.436701	6.77885e-19	3.89031e-17	93.0673	94.8899
Asic2	R62_KO	1.96873	-0.19168	4935791	0.453707	7.47861e-11	1.62175e-09	80.859	83.3379
Sgcz	R62_KO	4.14453	-0.19028	4.75242e+06	0.436852	8.26275e-19	4.67113e-17	98.8502	99.4836
Lrp1b	R62_KO	4.38444	-0.188452	4.38829e+06	0.403379	7.83826e-42	2.34384e-39	99.9324	100
Negr1	R62_KO	3.54264	-0.187406	4496479	0.413325	5.33195e-34	1.10158e-31	100	99.9728
Cdh10	R62_KO	0.931922	-0.187353	4754263	0.437021	2.37917e-19	1.43801e-17	63.4427	70.0462
Rbfox1	R62_KO	5.44993	-0.186447	4141832	0.380725	8.19123e-63	6.64835e-60	100	100
Brinp3	R62_KO	1.10943	-0.185407	4.9485e+06	0.454875	7.45538e-11	1.6198e-09	59.114	64.1479
Ccser1	R62_KO	2.88015	-0.180454	4.59717e+06	0.422581	1.82993e-27	2.14366e-25	99.256	99.701
Arhgap26	R62_KO	1.67007	-0.179259	4.75115e+06	0.436734	6.89313e-19	3.93601e-17	88.84	91.8728
Spock1	R62_KO	1.19488	-0.178863	4783921	0.439747	1.80912e-17	8.89913e-16	74.2983	78.3365
Nav3	R62_KO	2.21342	-0.173394	4757374	0.437307	1.45874e-18	8.04645e-17	95.2993	96.9829
Syne1	R62_KO	2.14795	-0.172433	4671913	0.429451	4.39306e-23	3.54031e-21	95.3669	96.6567
Rab3c	R62_KO	1.02932	-0.172009	4785652	0.439906	1.7587e-17	8.68876e-16	69.4285	76.5425
Dok6	R62_KO	1.73005	-0.171523	4.75141e+06	0.436758	7.15936e-19	4.06759e-17	89.8208	92.5251
Cntnap2	R62_KO	4.36018	-0.170326	4.58114e+06	0.421107	1.86341e-28	2.46208e-26	99.9324	99.9728
Olfm3	R62_KO	0.659891	-0.168524	4855820	0.446356	1.30726e-15	5.50162e-14	47.0747	55.0149
Pdzrn4	R62_KO	0.791186	-0.167808	4899917	0.45041	2.28988e-13	7.39201e-12	49.4082	56.972
Pcdh11x	R62_KO	1.16786	-0.166726	4909794	0.451317	4.83013e-12	1.24455e-10	69.0227	72.9818
Slc8a1	R62_KO	0.310302	-0.163752	4854557	0.44624	4.80511e-21	3.34972e-19	23.6388	33.2427
Adarb2	R62_KO	1.29584	-0.162458	4963509	0.456255	5.6604e-10	1.06137e-08	70.6459	74.069
Pigk	R62_KO	0.693903	-0.162245	4864377	0.447143	9.11765e-15	3.57255e-13	52.9253	58.4398
Grik2	R62_KO	3.13206	-0.159872	4675357	0.429768	6.86012e-23	5.4133e-21	99.628	99.8641
Rcan2	R62_KO	1.14946	-0.15926	4811007	0.442237	3.6255e-16	1.60924e-14	75.3128	78.4724
Rims2	R62_KO	2.7227	-0.155986	4.63584e+06	0.426135	3.79504e-25	3.62378e-23	99.0869	99.4836
Rarb	R62_KO	2.66187	-0.15057	4721378	0.433998	2.1099e-20	1.43562e-18	98.7825	98.9671
Alcam	R62_KO	2.15654	-0.14962	4.85067e+06	0.445883	3.18982e-14	1.14341e-12	94.0818	95.1074
Galntl6	R62_KO	3.12548	-0.149042	4975550	0.457362	2.2328e-09	3.73107e-08	97.9033	98.6953
Chsy3	R62_KO	1.7582	-0.148836	4.88797e+06	0.449311	1.13625e-12	3.28529e-11	88.5019	90.6225
Macrod2	R62_KO	3.83072	-0.148663	4.62317e+06	0.42497	6.78753e-26	6.70667e-24	99.8309	99.9728
Sgcd	R62_KO	1.49381	-0.147997	4.91248e+06	0.451564	9.65528e-12	2.40599e-10	81.6368	83.0389
Grid2	R62_KO	4.07156	-0.147486	4531808	0.416572	1.2667e-31	2.14828e-29	99.9662	99.9456
Ppp2r2b	R62_KO	2.53322	-0.144515	4827145	0.44372	2.94733e-15	1.19609e-13	97.7342	98.5594
Nyap2	R62_KO	1.08612	-0.144498	4887925	0.449307	7.31182e-13	2.17498e-11	71.3899	75.9446
Mei4	R62_KO	0.953389	-0.143703	4956992	0.455656	1.92799e-10	3.9271e-09	61.6841	66.2136
Acyp2	R62_KO	0.894851	-0.143674	4900520	0.450465	1.22635e-12	3.51893e-11	62.0223	67.2194
Samd5	R62_KO	0.7685	-0.142993	4.88282e+06	0.448838	1.20291e-13	4.00841e-12	56.882	62.517
Dlgap1	R62_KO	2.36087	-0.142728	4850436	0.445861	3.12417e-14	1.12342e-12	95.4346	96.4936
Oxr1	R62_KO	0.567285	-0.142571	4884473	0.44899	1.10882e-14	4.27101e-13	43.2195	51.3998
Robo2	R62_KO	3.20176	-0.140979	4847741	0.445613	2.39213e-14	8.91207e-13	99.1884	99.6466
Slc24a3	R62_KO	0.974534	-0.140338	4962628	0.456174	3.42101e-10	6.64494e-09	63.578	66.7845
Hs6st3	R62_KO	3.70169	-0.139782	4790632	0.440364	6.07219e-17	2.87493e-15	98.8502	99.1846
Dlg2	R62_KO	5.42148	-0.13786	4.08606e+06	0.375598	3.62427e-68	3.43188e-65	100	100
Csmd3	R62_KO	3.67131	-0.137161	4546334	0.417908	1.13124e-30	1.766e-28	99.9662	100
Ctnnd2	R62_KO	3.25246	-0.136994	4563420	0.419478	1.42122e-29	2.01867e-27	99.9662	99.8369
Ank2	R62_KO	2.87592	-0.136111	4.77028e+06	0.438493	6.34136e-18	3.2458e-16	99.2222	99.6195
D430041D05Rik	R62_KO	1.20573	-0.135987	4908277	0.451178	5.90024e-12	1.51001e-10	76.3274	80.0217
Ctnna2	R62_KO	3.68425	-0.13591	4.60935e+06	0.4237	1.00852e-26	1.08112e-24	99.9662	99.8913
Reln	R62_KO	1.46804	-0.135778	4.98752e+06	0.458462	5.23492e-09	8.12628e-08	80.9943	84.8872
Cdk14	R62_KO	0.677024	-0.135405	4898709	0.450299	2.57678e-13	8.24787e-12	51.5387	57.5428
Dst	R62_KO	1.68772	-0.134882	4862605	0.44698	1.01975e-13	3.42822e-12	90.3957	92.199
Klhl1	R62_KO	0.61555	-0.134603	4964198	0.456318	4.08179e-11	9.25775e-10	44.6737	51.1008
Col25a1	R62_KO	0.924029	-0.134383	4975368	0.457345	8.96241e-10	1.59874e-08	61.5489	65.969
Trim9	R62_KO	0.904	-0.134158	4890602	0.449553	6.32634e-13	1.89174e-11	65.3703	70.2093
Cdh13	R62_KO	1.33097	-0.133909	5003671	0.459947	1.57995e-08	2.15522e-07	74.7379	78.4996
Thsd7a	R62_KO	1.78882	-0.13259	5.02353e+06	0.461772	8.11056e-08	9.82519e-07	87.2168	90.9758
Htr2c	R62_KO	1.35466	-0.131988	5003323	0.459915	1.58404e-08	2.15821e-07	75.9892	79.5325
Lhfpl3	R62_KO	1.7049	-0.131871	4963882	0.456289	8.55852e-10	1.53634e-08	88.1299	89.9973
Ptprd	R62_KO	4.43558	-0.130848	4.68695e+06	0.430833	3.00044e-22	2.25788e-20	99.9662	100
Pou6f2	R62_KO	0.615385	-0.130145	4.96449e+06	0.456345	2.83347e-11	6.55737e-10	42.2049	49.8505
Cacna2d1	R62_KO	2.10429	-0.129966	4856223	0.446393	5.54091e-14	1.93133e-12	95.6375	95.9772
Camk4	R62_KO	1.83782	-0.12918	4.89199e+06	0.449681	1.676e-12	4.64496e-11	91.2749	92.0631
Srrm2	R62_KO	1.17497	-0.126332	4909800	0.451318	6.97863e-12	1.77799e-10	77.3081	80.8644
Cntnap5c	R62_KO	1.01398	-0.125331	5.00765e+06	0.460312	1.52507e-08	2.08536e-07	65.8776	69.8831
Gmds	R62_KO	1.09812	-0.12523	4939977	0.454092	8.33193e-11	1.7931e-09	72.4045	75.6456
Cacng3	R62_KO	0.674294	-0.125192	4951509	0.455152	4.34169e-11	9.78861e-10	52.2827	57.6515
Gramd1b	R62_KO	0.905866	-0.125083	4.95773e+06	0.455724	2.38217e-10	4.77401e-09	63.375	68.2522
Gpm6a	R62_KO	1.8617	-0.124759	4917356	0.452013	1.6845e-11	4.02121e-10	92.7291	94.0745
Grip1	R62_KO	2.45334	-0.124757	4923733	0.452599	2.97203e-11	6.83628e-10	97.2607	97.6896
Lrrtm3	R62_KO	2.23223	-0.124672	4.92383e+06	0.452608	2.9957e-11	6.8768e-10	95.7389	96.6023
Zdhhc14	R62_KO	1.45174	-0.124451	4.90529e+06	0.450904	5.40452e-12	1.38627e-10	85.4921	86.9258
Slc35f1	R62_KO	1.64216	-0.12441	4963360	0.456241	8.12335e-10	1.46517e-08	86.8786	88.6926
Pclo	R62_KO	1.80806	-0.123768	4.90132e+06	0.450538	3.96252e-12	1.03035e-10	91.8498	92.4708
Sntg1	R62_KO	2.61864	-0.122483	4.85335e+06	0.446129	4.18043e-14	1.47522e-12	98.3767	98.7497
Cmss1	R62_KO	1.46235	-0.122465	4.92285e+06	0.452517	2.60254e-11	6.07241e-10	85.695	87.2248
Rps6ka5	R62_KO	1.03176	-0.122031	4964532	0.456349	5.83932e-10	1.09132e-08	69.7328	72.7643
Pex5l	R62_KO	0.54922	-0.12033	4.97682e+06	0.457479	7.64364e-11	1.65438e-09	42.2049	48.4914
Adgrb3	R62_KO	4.19061	-0.119126	4620893	0.424761	4.96975e-26	4.99746e-24	99.9662	99.9728
Fmnl2	R62_KO	0.391792	-0.118488	4.98037e+06	0.457805	4.24138e-12	1.10034e-10	31.4508	38.4344
Ppfia2	R62_KO	1.74556	-0.118032	4.96806e+06	0.456673	1.21323e-09	2.13404e-08	90.1251	92.2533
Pde1a	R62_KO	0.349061	-0.117394	5.06002e+06	0.465126	8.81917e-10	1.57566e-08	25.2621	31.3672
Npas3	R62_KO	0.357561	-0.117154	4997331	0.459364	7.00143e-12	1.7798e-10	28.441	35.526
Map2	R62_KO	2.01319	-0.116785	4.87004e+06	0.447663	2.12783e-13	6.90814e-12	94.9949	95.1074
Setbp1	R62_KO	1.54303	-0.116615	4.98577e+06	0.458301	4.81567e-09	7.55807e-08	86.5742	88.8828
Agbl4	R62_KO	1.79384	-0.116348	5.0116e+06	0.460675	3.43162e-08	4.38622e-07	89.2459	90.7584
Tmem178b	R62_KO	2.32995	-0.11606	4921844	0.452425	2.51831e-11	5.88798e-10	97.1255	97.9886
Gab2	R62_KO	0.349006	-0.115771	4.98613e+06	0.458334	3.64852e-12	9.5306e-11	29.9628	36.4773
Tenm3	R62_KO	2.09912	-0.115591	5083569	0.467291	4.45721e-06	3.67809e-05	90.328	92.0631
Sobp	R62_KO	0.581553	-0.113916	4990387	0.458726	3.8583e-10	7.44343e-09	43.9973	50.2854
Neto1	R62_KO	1.54116	-0.11367	4989001	0.458598	6.13859e-09	9.37537e-08	85.9655	87.7412
Gabarapl2	R62_KO	0.0988561	-0.113467	4899715	0.450391	3.97477e-29	5.57596e-27	9.67196	19.2715
Clec16a	R62_KO	0.508563	-0.112186	4959923	0.455925	1.72344e-11	4.10554e-10	42.8475	48.872
Rfx3	R62_KO	1.20792	-0.112087	4953603	0.455344	3.0388e-10	5.97403e-09	77.2066	78.4996
Kalrn	R62_KO	2.71824	-0.111834	4.79042e+06	0.440344	5.9322e-17	2.8204e-15	99.4589	99.2389
Dip2c	R62_KO	2.1702	-0.110826	4986954	0.45841	5.44411e-09	8.39367e-08	95.9757	96.8198
Tmeff2	R62_KO	1.14067	-0.11072	5.0452e+06	0.463765	2.80687e-07	3.02317e-06	70.8488	73.7157
Dpyd	R62_KO	0.323149	-0.110715	4993930	0.459051	1.39103e-12	3.95157e-11	25.7694	33.4058
Ldb2	R62_KO	1.22026	-0.110456	5032579	0.462604	1.27856e-07	1.47495e-06	74.5688	76.9231
Nkain3	R62_KO	1.13258	-0.110251	5085283	0.467449	3.59482e-06	3.03477e-05	67.3318	70.6714
Hdac9	R62_KO	0.536074	-0.109798	5.0331e+06	0.462652	6.65431e-09	1.00549e-07	39.9053	45.6646
Chl1	R62_KO	0.504245	-0.109794	5016657	0.461141	1.98853e-09	3.35745e-08	40.9537	46.6431
Pbx1	R62_KO	2.09418	-0.109429	4.99579e+06	0.459222	1.06864e-08	1.53513e-07	94.0142	95.0802
Frmd4a	R62_KO	2.63385	-0.109389	4936087	0.453734	8.6392e-11	1.85221e-09	95.164	94.9443
Ptprz1	R62_KO	0.402854	-0.108811	5003030	0.459888	8.14439e-11	1.75607e-09	33.277	39.9293
Xkr6	R62_KO	1.64874	-0.10726	4970286	0.456878	1.44149e-09	2.50497e-08	89.4826	90.405
Prr16	R62_KO	0.359534	-0.107127	5038408	0.46314	4.75584e-10	9.06721e-09	28.9821	34.9008
Nbea	R62_KO	2.63047	-0.106828	4.86955e+06	0.447618	2.03639e-13	6.64927e-12	99.0531	99.1846
Il1rapl1	R62_KO	4.15487	-0.106433	4772620	0.438708	8.2529e-18	4.1679e-16	99.9324	100
Syt14	R62_KO	0.879457	-0.105895	5006130	0.460173	1.27592e-08	1.78991e-07	65.0998	68.4425
Arpp21	R62_KO	2.40123	-0.104566	4914809	0.451778	1.35188e-11	3.28235e-10	98.0724	97.8527
Nol4	R62_KO	1.02296	-0.104384	5029025	0.462277	8.51534e-08	1.02175e-06	69.699	72.1392
Kcnh7	R62_KO	1.36937	-0.104155	5128660	0.471436	5.31853e-05	0.000335747	71.931	75.8902
Paxbp1	R62_KO	0.844222	-0.104002	4.99515e+06	0.459164	4.80964e-09	7.55807e-08	63.206	66.5126
Lrfn5	R62_KO	3.07576	-0.103529	4.92338e+06	0.452566	2.88218e-11	6.65655e-10	99.6956	99.6195
St7	R62_KO	0.770966	-0.103383	5.01111e+06	0.46063	1.28544e-08	1.80104e-07	58.7082	63.4955
Ptprg	R62_KO	0.697399	-0.102031	5079548	0.466922	6.55364e-07	6.51523e-06	46.466	51.6173
Aig1	R62_KO	0.87595	-0.101862	5034112	0.462745	9.21052e-08	1.09591e-06	62.8001	66.5942
Upp2	R62_KO	1.24861	-0.100678	5.07255e+06	0.466279	1.91899e-06	1.72375e-05	75.6172	76.5697
Actr3b	R62_KO	0.53015	-0.100533	5.01457e+06	0.460948	3.22836e-09	5.21819e-08	44.606	49.9864
Cacna1c	R62_KO	2.74842	-0.100388	5027854	0.46217	1.12308e-07	1.30353e-06	98.6811	99.2933
Rps6ka3	R62_KO	1.41517	0.100143	5.79938e+06	0.53309	3.19609e-06	2.73679e-05	82.5161	79.0432
Cap2	R62_KO	1.33855	0.100399	5819549	0.534944	8.58216e-07	8.32784e-06	82.0764	77.657
Zfhx3	R62_KO	1.42998	0.100607	5.7487e+06	0.528432	5.73641e-05	0.000358542	75.7186	72.4382
Ndufaf7	R62_KO	0.356929	0.100631	5912796	0.543515	6.92398e-15	2.75095e-13	32.0933	23.2944
Man2a2	R62_KO	0.608153	0.100669	5868637	0.539456	1.52479e-09	2.62916e-08	49.9493	42.0767
Ccnt2	R62_KO	0.744145	0.100922	5852302	0.537955	2.10179e-08	2.80312e-07	58.2685	50.5029
Cdyl2	R62_KO	0.453835	0.100922	5.88441e+06	0.540906	7.25057e-12	1.83902e-10	37.8424	29.3286
Grik5	R62_KO	0.97651	0.100923	5813553	0.534393	8.62792e-07	8.35797e-06	70.0372	62.8703
Tsc22d1	R62_KO	1.25429	0.101162	5800716	0.533213	2.7835e-06	2.42181e-05	79.9121	74.8573
Ano3	R62_KO	1.5866	0.101223	5.77649e+06	0.530986	1.33987e-05	9.78469e-05	86.8448	82.9573
Cadm3	R62_KO	0.490932	0.101403	5.89816e+06	0.54217	9.79505e-12	2.43547e-10	42.002	33.6504
Cyp46a1	R62_KO	0.288933	0.10159	5923474	0.544497	3.21534e-18	1.7153e-16	26.3104	17.4232
Camk1d	R62_KO	1.96719	0.101642	5.83174e+06	0.536064	4.20857e-07	4.35537e-06	92.7968	91.1389
Rsbn1	R62_KO	0.574717	0.101684	5.88257e+06	0.540737	2.41415e-10	4.82957e-09	47.6835	39.0867
Ly6h	R62_KO	0.461587	0.101758	5869885	0.539571	6.90721e-11	1.50936e-09	39.2628	31.3672
Kif1b	R62_KO	1.72626	0.101787	5837370	0.536582	2.84771e-07	3.06425e-06	91.444	88.4751
Smg5	R62_KO	0.414902	0.101935	5.90817e+06	0.54309	2.5527e-13	8.19388e-12	36.6588	27.8337
Drg1	R62_KO	0.655164	0.102031	5.86046e+06	0.538704	4.83871e-09	7.58376e-08	52.3504	44.6861
Nrg2	R62_KO	1.45753	0.102075	5.79902e+06	0.533057	3.33605e-06	2.84474e-05	84.4437	80.6741
Kifc2	R62_KO	0.4491	0.102315	5916741	0.543878	3.65851e-13	1.146e-11	39.2628	30.3887
Ppt1	R62_KO	0.4796	0.102337	5.88918e+06	0.541344	1.94018e-11	4.59298e-10	41.63	32.7806
Asxl1	R62_KO	0.796544	0.102383	5.83182e+06	0.536072	1.27521e-07	1.47259e-06	60.1285	53.4384
Pnisr	R62_KO	1.8166	0.102733	5.85184e+06	0.537912	1.04607e-07	1.22288e-06	93.2026	90.6768
Csnk1g1	R62_KO	1.12106	0.102792	5809878	0.534055	1.3652e-06	1.26223e-05	75.3805	69.0949
Ppm1h	R62_KO	0.940197	0.102837	5811619	0.534215	8.60147e-07	8.33946e-06	66.3848	60.9133
Atp5b	R62_KO	0.385695	0.102866	5.91283e+06	0.543518	2.53657e-14	9.38863e-13	33.8857	25.0068
Traf3ip2	R62_KO	0.339476	0.103084	5.92566e+06	0.544698	1.84157e-16	8.37032e-15	30.0981	21.0927
Selenoi	R62_KO	0.434896	0.103096	5924935	0.544631	6.19126e-14	2.11265e-12	38.0453	28.486
Ndfip1	R62_KO	0.805808	0.1033	5854803	0.538184	2.41042e-08	3.16277e-07	61.3121	53.7646
2020-03-07	R62_KO	0.564871	0.103366	5870027	0.539584	6.84917e-10	1.25528e-08	46.6689	39.1139
Kcnk2	R62_KO	0.924304	0.103482	5797600	0.532926	1.71195e-06	1.55498e-05	61.9885	56.7274
Dbn1	R62_KO	0.715826	0.103483	5862905	0.538929	7.21893e-09	1.0836e-07	56.5776	48.6002
Car11	R62_KO	0.346434	0.104077	5921944	0.544356	8.84743e-16	3.79371e-14	31.2141	22.2071
Celf1	R62_KO	1.31139	0.10408	5838963	0.536728	2.29773e-07	2.5129e-06	82.0764	77.3852
Slc38a2	R62_KO	0.296312	0.104103	5.94951e+06	0.54689	8.58783e-20	5.36173e-18	26.9868	17.6135
Tmem126a	R62_KO	0.325596	0.104211	5941218	0.546128	7.15323e-18	3.64494e-16	29.2864	20.087
Vmp1	R62_KO	0.73235	0.104382	5857416	0.538425	1.14677e-08	1.63088e-07	56.9158	48.6002
Fam126b	R62_KO	0.679688	0.104589	5867255	0.539329	3.54939e-09	5.68853e-08	54.0413	46.2354
Lancl1	R62_KO	0.458374	0.104623	5.91438e+06	0.543661	5.54461e-13	1.67562e-11	39.5671	30.7149
Qtrt1	R62_KO	0.364696	0.104764	5.93709e+06	0.545749	3.09525e-16	1.39017e-14	32.533	23.2128
Pde4a	R62_KO	0.420264	0.104794	5885448	0.541001	2.04895e-12	5.5699e-11	35.1708	27.3172
Rab34	R62_KO	0.325491	0.104891	5935929	0.545642	2.23438e-17	1.08501e-15	29.3203	20.6306
L3mbtl3	R62_KO	0.568715	0.105187	5.84969e+06	0.537715	2.06242e-09	3.46676e-08	43.6253	36.2599
Slc50a1	R62_KO	0.235362	0.105214	5958883	0.547752	1.01743e-24	9.55455e-23	22.0832	12.6937
Psma3	R62_KO	0.569764	0.105224	5.90659e+06	0.542945	2.27363e-11	5.33786e-10	47.4806	38.7334
Kif21a	R62_KO	1.37609	0.105243	5.80378e+06	0.533494	2.42979e-06	2.14029e-05	83.9026	78.4996
Nsg2	R62_KO	1.17551	0.10534	5834544	0.536322	2.7708e-07	2.99283e-06	76.8684	72.0576
Drd1	R62_KO	0.319652	0.105578	5931516	0.545236	1.46982e-17	7.29325e-16	28.5763	19.5162
Prelid3a	R62_KO	0.467987	0.105667	5.9116e+06	0.543405	9.42185e-13	2.7522e-11	39.9729	31.2585
Bsg	R62_KO	0.319164	0.105812	5957900	0.547661	4.60419e-19	2.71075e-17	29.3879	19.7064
Tet3	R62_KO	0.73361	0.105817	5887875	0.541225	9.20431e-10	1.63932e-08	57.1525	48.4643
Arhgap33	R62_KO	0.351859	0.106482	5936504	0.545695	1.59546e-16	7.28311e-15	31.4508	22.5877
Papola	R62_KO	0.982209	0.106611	5861206	0.538773	2.9484e-08	3.79848e-07	70.0034	63.414
Add2	R62_KO	1.16434	0.106922	5.81808e+06	0.534809	8.24437e-07	8.02061e-06	76.9023	70.2365
Slc35f3	R62_KO	1.08736	0.106931	5.82296e+06	0.535257	5.14528e-07	5.2295e-06	71.931	66.4583
Pak6	R62_KO	0.325874	0.106961	5947386	0.546695	2.04515e-18	1.10662e-16	29.185	19.6793
Cacna2d2	R62_KO	0.377824	0.107158	5935991	0.545647	7.46463e-16	3.22512e-14	33.3108	24.1642
Zcchc14	R62_KO	0.651768	0.107495	5.88611e+06	0.541062	5.16526e-10	9.78214e-09	52.5194	44.2512
Cdk9	R62_KO	0.365152	0.107768	5.95686e+06	0.547566	2.17193e-17	1.05921e-15	32.7359	23.2128
Cdc40	R62_KO	0.521412	0.107823	5918528	0.544042	2.74595e-12	7.27325e-11	44.5722	35.7978
Phf3	R62_KO	0.9516	0.108315	5870932	0.539667	1.27288e-08	1.78991e-07	68.3463	61.7831
Hhipl1	R62_KO	0.147856	0.108509	5.98986e+06	0.550599	5.40842e-50	2.56066e-47	13.8654	3.75102
Fam171a2	R62_KO	0.294332	0.108991	5.96587e+06	0.548394	2.70515e-21	1.92117e-19	26.6486	17.0699
Pdzd2	R62_KO	1.49792	0.109097	5.79783e+06	0.532947	3.49326e-06	2.96224e-05	81.975	78.3365
Runx1t1	R62_KO	1.5199	0.109225	5.82004e+06	0.534989	8.67351e-07	8.39498e-06	84.8157	81.2721
Macrod1	R62_KO	0.517006	0.109258	5884959	0.540956	4.52125e-11	1.01331e-09	42.2388	34.4387
Pcyt2	R62_KO	0.406985	0.109316	5945061	0.546481	1.49612e-15	6.27322e-14	35.8133	26.6649
Ap2b1	R62_KO	0.78615	0.109367	5866340	0.539245	8.01777e-09	1.18937e-07	59.486	51.8891
Haghl	R62_KO	0.261376	0.109723	5975297	0.549261	4.30432e-24	3.76231e-22	24.2137	14.542
Mbd2	R62_KO	0.616504	0.109788	5915319	0.543747	1.96654e-11	4.64569e-10	49.7802	41.7233
Dhdds	R62_KO	0.625058	0.109844	5.89646e+06	0.542014	1.36583e-10	2.83211e-09	50.6256	42.2669
Caprin1	R62_KO	0.690533	0.109921	5885614	0.541017	7.43883e-10	1.35461e-08	53.5678	46.6703
Nipsnap2	R62_KO	0.583378	0.11011	5911978	0.54344	1.5267e-11	3.66762e-10	48.1231	39.0595
Grina	R62_KO	0.495877	0.110116	5.93147e+06	0.545232	2.96017e-13	9.44844e-12	42.4078	33.5689
H3f3a	R62_KO	0.490231	0.110372	5.92905e+06	0.54501	3.01025e-13	9.58138e-12	41.6977	33.0796
Snca	R62_KO	0.984001	0.110399	5841174	0.536932	1.11784e-07	1.29878e-06	67.095	61.2395
N4bp2l2	R62_KO	0.652983	0.11057	5.91233e+06	0.543472	4.94163e-11	1.10318e-09	53.0605	44.1696
Tmed9	R62_KO	0.38563	0.110795	5972422	0.548996	7.71033e-18	3.91127e-16	34.393	24.1642
Oxct1	R62_KO	1.18006	0.110951	5.8689e+06	0.53948	2.35929e-08	3.11004e-07	77.3757	72.2207
Atcay	R62_KO	0.615246	0.110969	5890687	0.541483	1.79489e-10	3.68146e-09	49.4082	41.1525
Atp1a3	R62_KO	0.990555	0.111076	5877579	0.540278	8.54147e-09	1.25884e-07	70.5783	63.3596
Gprin3	R62_KO	0.81901	0.111184	5881391	0.540629	2.5394e-09	4.17119e-08	59.9932	52.6502
Eno2	R62_KO	0.529658	0.111272	5.92272e+06	0.544427	1.68059e-12	4.64637e-11	44.6398	35.4716
Stx5a	R62_KO	0.485812	0.111585	5.94653e+06	0.546616	3.66028e-14	1.29974e-12	41.7315	32.5088
Wdr33	R62_KO	0.925708	0.111664	5.88346e+06	0.540819	4.28243e-09	6.79626e-08	67.467	59.7717
Akt3	R62_KO	1.55564	0.112023	5.84613e+06	0.537387	1.50241e-07	1.71233e-06	87.1153	83.365
Aco2	R62_KO	0.708558	0.1121	5.90404e+06	0.54271	1.92847e-10	3.9271e-09	56.138	47.5673
Sipa1l1	R62_KO	1.95851	0.112105	5.9004e+06	0.542376	2.77755e-09	4.52817e-08	93.7775	92.0087
Pias1	R62_KO	0.877702	0.112177	5871326	0.539703	8.92856e-09	1.3091e-07	64.3896	57.1623
Vti1b	R62_KO	0.450035	0.112456	5943390	0.546328	1.2226e-14	4.69338e-13	38.9922	29.5733
Pten	R62_KO	1.13603	0.112645	5880424	0.54054	9.10815e-09	1.33199e-07	75.4481	69.8831
Otud7a	R62_KO	1.63656	0.11273	5812348	0.534282	1.48414e-06	1.36002e-05	89.3811	84.9144
Syp	R62_KO	0.540484	0.113439	5937125	0.545752	4.52603e-13	1.39754e-11	45.0118	36.2599
Ptprs	R62_KO	0.787273	0.114104	5886125	0.541064	1.68757e-09	2.88358e-08	59.9932	52.4055
Trim46	R62_KO	0.596045	0.114138	5939178	0.54594	1.31774e-12	3.77167e-11	49.2053	39.9837
Gnptg	R62_KO	0.350767	0.11426	5988470	0.550471	3.8403e-20	2.47939e-18	31.5522	21.3373
Sgk3	R62_KO	0.648739	0.11456	5888865	0.541316	2.79034e-10	5.51421e-09	50.2875	42.7018
Numb	R62_KO	0.720668	0.114686	5895153	0.541894	4.07269e-10	7.84373e-09	55.7998	47.4042
Vps50	R62_KO	0.574698	0.11486	5957937	0.547665	1.117e-13	3.73307e-12	47.8864	38.2441
Cst3	R62_KO	0.403537	0.114951	5948411	0.546789	3.91347e-16	1.7303e-14	34.7311	25.3058
Sbno1	R62_KO	0.680713	0.115026	5.91815e+06	0.544008	3.68249e-11	8.38559e-10	54.3794	45.3384
Nptn	R62_KO	1.8355	0.115461	5919055	0.544091	6.18032e-10	1.15126e-08	92.1542	90.2963
Gpi1	R62_KO	0.749473	0.115592	5.90672e+06	0.542957	2.14658e-10	4.32475e-09	58.3023	49.7961
Iqsec3	R62_KO	0.25619	0.115747	6002938	0.551801	6.68424e-28	8.43923e-26	23.3683	12.9383
Prickle1	R62_KO	1.43931	0.115816	5818469	0.534845	9.05028e-07	8.72286e-06	81.3324	76.2707
Dtnb	R62_KO	1.94628	0.115897	5894966	0.541876	4.25286e-09	6.75878e-08	94.3524	91.9543
Hnrnph3	R62_KO	0.59134	0.116052	5.93663e+06	0.545706	1.57341e-12	4.38978e-11	49.07	39.576
Drc1	R62_KO	0.327879	0.116328	5.98446e+06	0.550103	5.21667e-21	3.59255e-19	29.3541	19.4074
Mtif2	R62_KO	0.54293	0.116423	5.91506e+06	0.543724	3.59838e-12	9.42129e-11	43.9635	35.825
Npepps	R62_KO	1.09732	0.116601	5.87425e+06	0.539972	1.38432e-08	1.91829e-07	74.6703	68.1163
Gsdme	R62_KO	0.615278	0.116768	5911337	0.543381	2.01644e-11	4.7537e-10	48.7995	39.9565
Far1	R62_KO	0.802872	0.116792	5927785	0.544893	5.36273e-11	1.1925e-09	61.1769	53.819
Srsf5	R62_KO	0.877055	0.117523	5887071	0.541151	2.54023e-09	4.17119e-08	64.8969	56.8361
Apoe	R62_KO	0.381507	0.117556	5972374	0.548992	3.03147e-18	1.62484e-16	33.1417	23.3487
Ptk2b	R62_KO	0.830054	0.117852	5.90284e+06	0.5426	4.79369e-10	9.12408e-09	61.4136	53.6015
Gria2	R62_KO	3.24886	0.118014	6.10255e+06	0.560958	1.23942e-17	6.20419e-16	99.8309	99.701
Ddx50	R62_KO	0.632197	0.118048	5.94004e+06	0.546019	2.18942e-12	5.89535e-11	51.2682	42.2397
Pacsin1	R62_KO	1.16777	0.118187	5880998	0.540592	8.89536e-09	1.30592e-07	76.0906	70.318
Ddx5	R62_KO	1.82867	0.118367	5.93094e+06	0.545183	2.3128e-10	4.6514e-09	92.4586	90.2147
Rc3h2	R62_KO	0.788875	0.11912	5918972	0.544083	1.01542e-10	2.16071e-09	60.5005	52.324
Kcnq2	R62_KO	0.777422	0.119167	5.91621e+06	0.543829	1.21075e-10	2.53366e-09	59.9256	51.8619
Capn15	R62_KO	0.472206	0.11978	5987841	0.550414	1.23709e-16	5.69109e-15	40.7508	30.9323
Pnn	R62_KO	0.78381	0.120211	5915676	0.54378	1.28512e-10	2.67942e-09	60.1623	51.8347
Sec61a2	R62_KO	0.601397	0.120304	5945770	0.546546	7.07256e-13	2.10933e-11	49.3405	40.2283
Pkig	R62_KO	0.608207	0.120427	5931101	0.545198	2.69272e-12	7.14891e-11	48.6642	39.7391
5031439G07Rik	R62_KO	0.368582	0.120605	5986599	0.550299	1.01072e-19	6.27588e-18	31.9242	22.0984
Itm2b	R62_KO	0.561317	0.121126	5953132	0.547223	1.2239e-13	4.06641e-12	46.7704	36.9394
Mycbp2	R62_KO	2.44438	0.121151	5.98191e+06	0.549869	2.67145e-12	7.10906e-11	98.3091	97.4993
Uchl1	R62_KO	0.375458	0.121428	5997294	0.551283	7.3252e-20	4.62423e-18	33.3108	23.1313
Ttll11	R62_KO	0.955546	0.121805	5904019	0.542709	8.04528e-10	1.4534e-08	67.5008	59.8532
Ptpn12	R62_KO	0.72983	0.121806	5.93126e+06	0.545212	1.44319e-11	3.48913e-10	55.0896	47.5129
Slc32a1	R62_KO	0.338039	0.122014	6.0395e+06	0.555162	1.77228e-24	1.61107e-22	30.9773	19.7608
Mbtd1	R62_KO	1.00007	0.122041	5.89611e+06	0.541981	1.83678e-09	3.12914e-08	69.1241	62.7344
Efr3b	R62_KO	0.684062	0.122161	5.92847e+06	0.544957	1.01855e-11	2.51604e-10	52.9591	43.8706
Map3k3	R62_KO	0.791804	0.122255	5916379	0.543845	1.148e-10	2.41122e-09	59.486	51.726
Slc6a6	R62_KO	1.1435	0.122504	5.88794e+06	0.541231	5.08583e-09	7.91648e-08	75.9892	69.5026
Aldoa	R62_KO	0.329862	0.122779	6.01942e+06	0.553316	9.58166e-24	8.10813e-22	29.557	18.8095
Rnf121	R62_KO	0.541756	0.12302	5919452	0.544127	1.79269e-12	4.93228e-11	43.3886	35.0911
Clstn1	R62_KO	0.753432	0.123074	5941511	0.546155	8.7677e-12	2.20415e-10	58.1332	49.769
Pbx3	R62_KO	2.2761	0.123723	5891441	0.541552	5.56724e-09	8.57188e-08	92.0866	91.4107
Scarb1	R62_KO	0.359615	0.12407	6024379	0.553772	1.46707e-22	1.12637e-20	32.161	21.1199
Tmod1	R62_KO	0.395277	0.124096	6008140	0.55228	3.19912e-20	2.08917e-18	34.1562	23.838
Ptpa	R62_KO	0.508728	0.124195	5.98423e+06	0.550081	5.3115e-16	2.32133e-14	42.4755	32.7806
Arhgap10	R62_KO	1.20675	0.124721	5884500	0.540914	7.12917e-09	1.07154e-07	78.0183	71.1878
Gps2	R62_KO	0.428685	0.124962	5994279	0.551005	4.60719e-18	2.39048e-16	37.166	27.3716
Gabra4	R62_KO	1.06498	0.125015	5.89934e+06	0.542278	1.54699e-09	2.65936e-08	70.9841	63.713
Rbm26	R62_KO	1.25281	0.125027	5905407	0.542836	1.50939e-09	2.61054e-08	80.7237	74.4496
Chst1	R62_KO	0.314971	0.125079	6048526	0.555992	1.38741e-26	1.45974e-24	28.9483	18.0212
Pja2	R62_KO	0.907559	0.125276	5926812	0.544804	1.07179e-10	2.27216e-09	66.8921	58.9291
Vgf	R62_KO	0.268704	0.125589	6052183	0.556328	9.04204e-32	1.58069e-29	24.5181	13.2101
Stxbp1	R62_KO	0.95349	0.126239	5.90446e+06	0.542749	8.30207e-10	1.49266e-08	68.7521	60.3697
Sgsm2	R62_KO	0.547774	0.126294	5976878	0.549406	4.45414e-15	1.79476e-13	45.0795	35.3901
Gpm6b	R62_KO	1.61372	0.126428	5901268	0.542456	2.48603e-09	4.10453e-08	88.3328	84.2348
Kcnma1	R62_KO	2.90432	0.126485	6.13144e+06	0.563613	4.59665e-19	2.71075e-17	99.3236	99.2933
Cyld	R62_KO	1.02236	0.126641	5925624	0.544694	1.71895e-10	3.53849e-09	70.6459	63.9848
U2surp	R62_KO	0.794633	0.126979	5965878	0.548395	1.34577e-12	3.84222e-11	60.8049	52.6774
Ak5	R62_KO	0.461459	0.127282	5.92016e+06	0.544192	2.70462e-14	9.91373e-13	35.1031	26.6377
Enah	R62_KO	1.09846	0.127379	5.89662e+06	0.542028	2.3538e-09	3.916e-08	74.4335	67.3824
Epb41l1	R62_KO	1.26054	0.128013	5.91503e+06	0.543721	6.66894e-10	1.22819e-08	79.2357	73.6613
Stmn3	R62_KO	0.592454	0.128044	5.9729e+06	0.54904	2.58378e-14	9.50146e-13	48.1569	38.9236
Gria3	R62_KO	2.2512	0.128186	5977713	0.549483	3.91911e-12	1.0214e-10	96.4829	95.2161
Camk2b	R62_KO	1.08411	0.128717	5.94095e+06	0.546103	5.54897e-11	1.22671e-09	73.7572	66.8932
Adgrb2	R62_KO	0.456337	0.128835	6012600	0.552689	1.49287e-18	8.19492e-17	39.1275	29.084
Adcy5	R62_KO	1.32914	0.129392	5910526	0.543307	1.03609e-09	1.83382e-08	81.6706	76.0805
Rnf112	R62_KO	0.534135	0.129448	6.00561e+06	0.552047	1.23329e-16	5.69109e-15	44.9104	34.928
Elmod1	R62_KO	1.73978	0.129966	5.90858e+06	0.543128	1.43043e-09	2.49294e-08	91.7822	87.6869
Tmem158	R62_KO	0.333494	0.130678	6.06916e+06	0.557889	1.66977e-27	1.97641e-25	30.301	18.6464
Tmem181a	R62_KO	1.00665	0.130934	5942058	0.546205	4.17679e-11	9.45435e-10	71.3223	63.8761
Dgkg	R62_KO	0.560652	0.131057	5981302	0.549813	1.79817e-15	7.45717e-14	44.2002	34.5474
Zfp799	R62_KO	0.44268	0.131165	6047288	0.555878	5.01742e-21	3.4764e-19	38.7217	27.6706
Dlgap4	R62_KO	1.09123	0.131178	5942972	0.546289	4.51714e-11	1.01331e-09	73.5543	66.2408
R3hdm4	R62_KO	0.340301	0.131189	6082799	0.559142	4.41187e-28	5.7623e-26	31.045	19.2715
Leng8	R62_KO	0.585664	0.131519	5999223	0.55146	1.06579e-15	4.55285e-14	47.9878	38.1082
Csf2ra	R62_KO	0.494255	0.132246	6018731	0.553253	3.90201e-18	2.04325e-16	41.8668	31.6119
Plekha5	R62_KO	2.46781	0.132328	6.01004e+06	0.552454	1.88661e-13	6.17797e-12	98.4106	97.2819
Actb	R62_KO	0.484485	0.132459	5.98624e+06	0.550267	1.14222e-16	5.29758e-15	39.9053	30.7692
Dhx30	R62_KO	0.764502	0.132587	5.95659e+06	0.547541	2.20414e-12	5.92095e-11	59.2492	49.5515
Chuk	R62_KO	0.695185	0.132976	5.98372e+06	0.550035	6.41585e-14	2.18273e-12	55.2249	45.9364
Camk2a	R62_KO	1.81975	0.133102	5968085	0.548598	9.21276e-12	2.31092e-10	92.6615	89.3993
Tesc	R62_KO	0.357944	0.133672	6051333	0.55625	3.61361e-25	3.47979e-23	31.2141	20.1413
Stag1	R62_KO	1.66672	0.133754	5898561	0.542207	3.12167e-09	5.05292e-08	90.5986	85.159
Sgk1	R62_KO	1.02522	0.133815	5919986	0.544176	2.0378e-10	4.12753e-09	65.8099	60.7774
Pkm	R62_KO	0.469045	0.134491	6044086	0.555584	3.65479e-20	2.37311e-18	40.6155	29.4917
Ttyh1	R62_KO	0.804641	0.134532	5.97539e+06	0.549269	4.92986e-13	1.514e-11	60.9401	51.8076
Epo	R62_KO	0.49331	0.134717	6039376	0.555151	2.10091e-19	1.27661e-17	41.9344	31.1498
Dnaja2	R62_KO	0.510921	0.135146	6056712	0.556744	5.36663e-20	3.4259e-18	43.8958	32.2914
Ghr	R62_KO	0.73705	0.135841	5.9576e+06	0.547634	7.49156e-13	2.22263e-11	54.0413	45.121
Nrxn2	R62_KO	0.493258	0.135985	6037908	0.555016	1.74351e-19	1.07089e-17	41.1566	30.7692
Prrc2b	R62_KO	0.898112	0.136518	5.98226e+06	0.549901	5.5437e-13	1.67562e-11	66.5201	57.0264
Rapgef4	R62_KO	1.57612	0.136919	5979184	0.549618	3.1823e-12	8.35116e-11	87.4197	83.9359
Arglu1	R62_KO	1.22554	0.137067	5951766	0.547098	2.7921e-11	6.48806e-10	78.7623	72.0848
Usp32	R62_KO	0.958746	0.137254	5.97169e+06	0.548929	2.09164e-12	5.65887e-11	68.583	60.2881
Sv2b	R62_KO	0.86377	0.137601	5.9464e+06	0.546604	1.03394e-11	2.54851e-10	61.9547	53.9821
Mdh1	R62_KO	0.449697	0.137605	6057466	0.556814	1.16964e-21	8.41179e-20	38.8908	27.6434
Srek1	R62_KO	1.15408	0.13776	5.97588e+06	0.549314	2.78194e-12	7.35144e-11	76.2597	69.6929
Cd47	R62_KO	0.757229	0.138006	5.99677e+06	0.551234	3.527e-14	1.25634e-12	59.2492	48.8176
Kctd17	R62_KO	0.372453	0.138439	6.10016e+06	0.560739	1.13182e-27	1.39792e-25	33.7166	21.5548
Klc1	R62_KO	0.942755	0.139839	5.97422e+06	0.549162	1.59598e-12	4.43402e-11	68.1434	60.125
Dgki	R62_KO	3.16214	0.140132	6120049	0.562566	1.71241e-18	9.35487e-17	99.5604	99.2389
Kcnh1	R62_KO	1.27354	0.140219	5931471	0.545232	1.62188e-10	3.34473e-09	78.3903	72.3838
Bcl11b	R62_KO	1.7328	0.14059	5935502	0.545602	1.54813e-10	3.19844e-09	90.9706	86.4365
Atpif1	R62_KO	0.354443	0.140988	6094630	0.56023	4.88292e-29	6.76641e-27	31.045	19.3259
Hsp90ab1	R62_KO	0.72487	0.141076	5.9935e+06	0.550934	2.75167e-14	9.98952e-13	56.2056	46.5344
Rgs9	R62_KO	1.29012	0.141348	5985596	0.550207	1.41203e-12	4.00123e-11	80.6899	74.6127
Cep164	R62_KO	0.625186	0.141369	6027428	0.554053	9.86801e-17	4.63348e-15	50.8285	40.174
Dnm1	R62_KO	1.09145	0.141662	5.98356e+06	0.55002	1.15833e-12	3.33219e-11	74.6703	66.5398
Gsg1l	R62_KO	0.474512	0.141766	6.03481e+06	0.554731	2.97678e-20	1.96658e-18	38.6202	27.6706
Nin	R62_KO	0.919363	0.141856	5986681	0.550307	3.77187e-13	1.17747e-11	66.2496	57.9233
Gpatch8	R62_KO	2.1076	0.142515	6.04139e+06	0.555336	8.41501e-15	3.30864e-13	96.3138	94.1288
Atp5a1	R62_KO	0.553094	0.142913	6070926	0.558051	4.27e-20	2.74124e-18	46.3307	35.3085
Onecut2	R62_KO	1.00444	0.14406	5.96758e+06	0.548552	3.07868e-12	8.09793e-11	68.583	60.2881
Acvr1c	R62_KO	0.363982	0.14497	6107142	0.56138	5.12864e-30	7.66799e-28	31.4846	19.1356
Gatad2b	R62_KO	0.9488	0.145482	6002128	0.551727	9.35804e-14	3.15535e-12	66.8921	59.4183
P2ry14	R62_KO	0.732397	0.145973	5984762	0.550131	5.6428e-14	1.96083e-12	54.8867	46.0723
Ppp3ca	R62_KO	3.57236	0.147038	6264978	0.575889	1.87624e-26	1.95594e-24	99.9324	99.9185
Slc4a3	R62_KO	0.892982	0.147088	6026044	0.553925	5.87338e-15	2.35828e-13	65.5056	56.5371
Ank3	R62_KO	4.24501	0.147413	6.46535e+06	0.594307	6.1867e-40	1.71462e-37	100	100
Pdlim7	R62_KO	0.361148	0.14813	6.14892e+06	0.565221	5.4321e-33	9.95563e-31	32.4653	19.6793
Tra2a	R62_KO	1.31646	0.148675	5989417	0.550558	9.93409e-13	2.89439e-11	81.0619	74.6398
Dot1l	R62_KO	0.76391	0.148678	6056892	0.556761	4.47252e-17	2.16261e-15	59.2154	48.5458
Syt7	R62_KO	0.75117	0.148878	6.04612e+06	0.55577	1.13088e-16	5.26646e-15	58.3362	47.1052
Glp2r	R62_KO	0.636692	0.149295	6075081	0.558433	3.04649e-19	1.8316e-17	51.2682	40.2827
Lrrk2	R62_KO	0.822806	0.149351	6.01192e+06	0.552627	9.67399e-15	3.75173e-13	60.2638	50.6659
Luc7l2	R62_KO	1.74926	0.150343	6042239	0.555414	7.47295e-15	2.95872e-13	91.444	87.8771
Adgrl1	R62_KO	1.03177	0.150719	6009735	0.552426	7.21469e-14	2.44718e-12	72.3368	63.3596
Dtna	R62_KO	1.35085	0.151496	5997649	0.551315	4.81801e-13	1.48366e-11	82.347	76.3251
C1qtnf4	R62_KO	0.574408	0.152262	6108254	0.561482	4.64867e-22	3.43005e-20	48.0216	35.8521
Pde8b	R62_KO	1.55328	0.152643	5.99699e+06	0.551255	5.86737e-13	1.76378e-11	86.8786	81.408
C2cd5	R62_KO	1.36916	0.153003	6.02432e+06	0.553767	3.70969e-14	1.31318e-12	83.3277	77.4123
Kif17	R62_KO	0.456474	0.153073	6130429	0.563521	5.12242e-27	5.76297e-25	39.0599	26.2571
Ttc14	R62_KO	1.08894	0.1532	6.02551e+06	0.553876	1.81619e-14	6.85628e-13	74.1968	66.1321
Slc6a17	R62_KO	0.583158	0.153427	6.09675e+06	0.560425	3.09573e-21	2.18489e-19	48.1569	36.6404
Npas2	R62_KO	0.983931	0.153634	6.00581e+06	0.552065	5.99317e-14	2.06365e-12	66.723	58.4942
Zdhhc20	R62_KO	0.993128	0.153951	6.04023e+06	0.55523	2.35699e-15	9.63398e-14	69.8681	60.6687
Srsf11	R62_KO	1.22638	0.154353	6.05193e+06	0.556305	1.78187e-15	7.41663e-14	79.1004	72.5197
Gad1	R62_KO	0.616847	0.155496	6.08578e+06	0.559416	2.34572e-20	1.58657e-18	49.5096	37.3199
Tmem191c	R62_KO	0.599828	0.15605	6.07742e+06	0.558647	6.24929e-20	3.96707e-18	48.6304	37.5646
Tspear	R62_KO	0.388801	0.156317	6083018	0.559162	6.54456e-28	8.35571e-26	31.1464	19.6249
Mgat5b	R62_KO	0.698962	0.156833	6068493	0.557827	2.82825e-18	1.5231e-16	54.65	44.0065
Gmcl1	R62_KO	0.962105	0.156997	6040066	0.555214	1.8211e-15	7.52478e-14	67.7376	58.6301
Son	R62_KO	1.56737	0.157879	5.99371e+06	0.550953	8.11056e-13	2.38757e-11	88.299	81.4895
Gad2	R62_KO	0.898516	0.157962	6050856	0.556206	3.20383e-16	1.43327e-14	64.5925	54.8247
Vamp4	R62_KO	0.452672	0.15914	6.1702e+06	0.567177	6.19873e-30	9.14755e-28	39.3642	26.2843
AC149090.1	R62_KO	1.0268	0.160888	5965810	0.548388	2.8182e-12	7.42998e-11	65.5056	58.5213
Nav2	R62_KO	2.20301	0.161712	6039717	0.555182	9.86845e-15	3.81412e-13	92.932	91.7369
Psap	R62_KO	0.778419	0.162249	6102491	0.560952	1.91364e-19	1.16907e-17	59.6212	48.3284
Pura	R62_KO	0.768415	0.162315	6.09236e+06	0.560021	6.10448e-19	3.53904e-17	58.7082	48.5186
Celf5	R62_KO	0.687851	0.162814	6124654	0.56299	2.06574e-21	1.47629e-19	54.9205	43.5716
Dtx3	R62_KO	0.653778	0.162847	6.1302e+06	0.5635	2.93769e-22	2.2254e-20	53.0605	40.3099
Nsun7	R62_KO	0.510343	0.163168	6.15248e+06	0.565547	5.77435e-27	6.30903e-25	42.4755	29.7907
Mapt	R62_KO	1.33272	0.163173	6034038	0.55466	1.30511e-14	4.99327e-13	82.0764	75.2922
Jakmip1	R62_KO	1.58086	0.164016	6030956	0.554377	2.1686e-14	8.15954e-13	87.724	82.0603
Snhg11	R62_KO	4.42179	0.165387	6.5428e+06	0.601426	6.42883e-46	2.43503e-43	99.7295	99.9185
Gnal	R62_KO	2.19618	0.16549	6.11411e+06	0.562021	3.36088e-18	1.78456e-16	96.8211	94.9443
Hspa8	R62_KO	0.717706	0.166189	6.08277e+06	0.559139	5.60555e-19	3.26645e-17	54.8529	44.5773
Dlgap3	R62_KO	1.0247	0.167024	6.06984e+06	0.557951	1.00403e-16	4.69498e-15	69.9696	61.3754
Abca8b	R62_KO	0.613912	0.168234	6136392	0.564069	9.633e-24	8.10813e-22	48.3598	36.0424
Snrnp48	R62_KO	0.661289	0.168429	6147575	0.565097	2.97505e-23	2.44968e-21	52.6209	41.1253
Ypel2	R62_KO	1.04737	0.168604	6.05896e+06	0.556951	3.56309e-16	1.58774e-14	70.7474	61.7559
Kcnd3	R62_KO	0.592107	0.169742	6107070	0.561373	5.86809e-23	4.66288e-21	44.2678	32.8894
Slc22a17	R62_KO	0.844413	0.16979	6103517	0.561047	5.21399e-19	3.05395e-17	63.6118	52.7861
Ssbp4	R62_KO	0.493962	0.170073	6210394	0.570871	1.46403e-31	2.44644e-29	42.3064	28.8122
Luc7l3	R62_KO	1.04878	0.170717	6092075	0.559995	1.08267e-17	5.44355e-16	72.303	63.3324
Kcnip2	R62_KO	0.879125	0.170875	6097355	0.56048	1.11399e-18	6.23561e-17	64.2205	52.4327
Ubb	R62_KO	0.430349	0.172706	6213910	0.571194	1.38731e-35	3.15279e-33	36.7264	22.9138
Rgs20	R62_KO	1.3626	0.173272	6039861	0.555195	6.11056e-15	2.43682e-13	78.627	72.2207
Calm2	R62_KO	1.15293	0.173675	6103999	0.561091	4.49439e-18	2.34265e-16	76.6994	67.8717
Syt6	R62_KO	0.969964	0.174697	6092316	0.560017	4.71601e-18	2.43582e-16	67.1965	57.6515
Atp1b1	R62_KO	1.06774	0.174799	6.11209e+06	0.561835	1.23273e-18	6.83296e-17	73.4528	64.4197
Tacc1	R62_KO	1.08759	0.175045	6.1137e+06	0.561983	1.08767e-18	6.11842e-17	73.8925	65.0177
Grasp	R62_KO	0.282619	0.17617	6244740	0.574028	1.37294e-57	9.17688e-55	24.6534	10.2473
Mpped2	R62_KO	1.82434	0.17827	6.09003e+06	0.559807	4.74124e-17	2.26364e-15	91.9513	87.1976
Strbp	R62_KO	2.29773	0.178811	6.24056e+06	0.573644	5.2297e-25	4.95209e-23	97.4298	95.9772
Cdk17	R62_KO	1.30524	0.179301	6.0868e+06	0.55951	4.57825e-17	2.19505e-15	81.7382	73.2808
Zranb2	R62_KO	1.20693	0.181104	6128804	0.563371	3.10819e-19	1.85886e-17	79.2019	70.2093
Gm20388	R62_KO	2.25656	0.183664	6234458	0.573083	1.18408e-24	1.10284e-22	97.5313	95.5694
Acp1	R62_KO	0.506197	0.184837	6.25795e+06	0.575243	2.57992e-35	5.74817e-33	42.8813	28.486
Ptpn5	R62_KO	0.859058	0.188085	6192111	0.56919	5.40378e-24	4.65175e-22	64.2205	51.9163
Slc12a5	R62_KO	0.89413	0.18891	6.17392e+06	0.567519	1.18524e-22	9.1618e-21	66.0805	54.6072
Tnrc6c	R62_KO	2.02163	0.189661	6194647	0.569424	2.08035e-22	1.58651e-20	95.4684	92.0087
Camkv	R62_KO	0.731088	0.190123	6224733	0.572189	2.11555e-27	2.45296e-25	56.8482	43.6803
Atp6v0a1	R62_KO	1.76803	0.191276	6.21395e+06	0.571198	1.66141e-23	1.378e-21	91.6808	87.4422
Krit1	R62_KO	0.910282	0.191465	6198453	0.569773	4.82624e-24	4.18631e-22	66.8583	54.58
Tac1	R62_KO	0.614637	0.192152	6.2433e+06	0.573895	4.25287e-31	6.90363e-29	49.1038	35.1726
Strip2	R62_KO	0.846292	0.195873	6.1839e+06	0.568436	6.43809e-24	5.50045e-22	61.0754	49.1982
Kcnip3	R62_KO	0.718445	0.196313	6207341	0.57059	5.84577e-27	6.32624e-25	53.6693	40.9622
Pcsk1n	R62_KO	0.501659	0.196356	6298426	0.578963	1.84466e-39	4.99067e-37	42.1035	27.1269
Cit	R62_KO	1.15778	0.199365	6196445	0.569589	5.24731e-23	4.19896e-21	76.4626	67.1922
Ablim2	R62_KO	1.99909	0.200234	6228215	0.572509	2.66585e-24	2.34822e-22	94.8258	91.003
Actn1	R62_KO	0.992194	0.201264	6213082	0.571118	1.49411e-24	1.38029e-22	69.7328	58.3582
Itm2c	R62_KO	0.651723	0.203773	6290903	0.578272	1.57029e-33	3.07641e-31	52.5871	37.7005
Comt	R62_KO	0.683822	0.205245	6297016	0.578834	1.78084e-33	3.42978e-31	53.9398	39.277
Ccnl2	R62_KO	1.01304	0.208844	6.26499e+06	0.57589	1.38796e-27	1.66015e-25	71.1194	59.7445
mt-Nd1	R62_KO	0.717965	0.20895	6205701	0.57044	1.31746e-27	1.60971e-25	51.3696	37.8635
Klhl2	R62_KO	1.21182	0.209838	6.21972e+06	0.571728	2.56595e-24	2.27789e-22	76.9699	67.5727
Zfr	R62_KO	1.35937	0.210085	6251485	0.574648	6.5067e-26	6.48558e-24	81.9073	74.5583
Dnmt3a	R62_KO	1.79719	0.211834	6.22914e+06	0.572594	2.25675e-24	2.03519e-22	92.4586	86.7083
Srsf7	R62_KO	0.662901	0.2128	6349821	0.583687	8.15716e-38	1.97212e-35	53.2973	38.3528
Atp2b1	R62_KO	2.52049	0.213092	6392371	0.587599	1.08238e-34	2.32059e-32	98.0724	97.0101
Sorcs1	R62_KO	2.16234	0.216572	6145561	0.564912	8.45541e-20	5.30822e-18	92.932	89.1547
Cpne5	R62_KO	1.29644	0.221113	6.24451e+06	0.574007	1.25645e-25	1.23078e-23	80.3855	70.1006
Mapk4	R62_KO	0.975914	0.223014	6261952	0.57561	5.6432e-28	7.28679e-26	66.4525	54.5529
Ahi1	R62_KO	1.945	0.224712	6.25932e+06	0.575368	3.92999e-26	4.0231e-24	93.7098	88.7469
Rmdn1	R62_KO	1.10513	0.225697	6.30388e+06	0.579464	9.57211e-30	1.39446e-27	74.3321	63.3324
Ndrg4	R62_KO	1.41082	0.225821	6299667	0.579077	8.61988e-29	1.16604e-26	85.2553	76.1892
Adgrb1	R62_KO	0.972071	0.227929	6343694	0.583124	4.44198e-33	8.27447e-31	69.4285	56.7002
mt-Nd2	R62_KO	0.945297	0.229973	6189666	0.568966	2.55686e-24	2.27789e-22	60.3314	49.171
Aplp1	R62_KO	0.689247	0.233656	6438743	0.591861	1.07396e-44	3.58924e-42	55.0558	38.9508
Serpine2	R62_KO	0.942703	0.236234	6306991	0.57975	2.60043e-31	4.28241e-29	64.6939	51.7804
Grin2a	R62_KO	2.76133	0.241879	6.38204e+06	0.586649	5.56695e-34	1.12959e-31	98.2415	96.7654
Cntn3	R62_KO	1.1101	0.242373	6.26182e+06	0.575599	1.34618e-27	1.6273e-25	69.4285	57.5156
Ttc19	R62_KO	0.99624	0.243772	6410027	0.589222	1.11239e-37	2.63334e-35	71.0856	57.3254
Tsnax	R62_KO	0.889851	0.243963	6401314	0.588421	3.25392e-38	8.0379e-36	65.7085	50.0136
Trim35	R62_KO	0.930172	0.244135	6422674	0.590384	3.19981e-39	8.45569e-37	68.1772	53.4384
Ssbp2	R62_KO	2.14913	0.244924	6384222	0.58685	3.86426e-34	8.1314e-32	94.6567	92.2533
Ckb	R62_KO	0.770319	0.245274	6431453	0.591191	1.65523e-42	5.08336e-40	59.486	42.6203
mt-Nd4	R62_KO	0.950401	0.246018	6.23239e+06	0.572893	5.26406e-27	5.86427e-25	60.602	48.6545
Syn2	R62_KO	1.33352	0.24718	6323487	0.581267	1.38627e-30	2.12867e-28	79.7092	69.9103
Cacna1a	R62_KO	2.47948	0.247714	6.5424e+06	0.60139	6.89944e-46	2.52898e-43	98.1738	96.2218
Rimbp2	R62_KO	1.16757	0.248582	6.34061e+06	0.582841	3.86782e-32	6.9762e-30	74.9746	63.6314
Rbm39	R62_KO	1.90459	0.252719	6467399	0.594495	4.10543e-40	1.16625e-37	94.1833	89.0188
Ogt	R62_KO	1.53464	0.253723	6423700	0.590479	4.61682e-37	1.07063e-34	87.7917	79.5868
Ttr	R62_KO	0.408354	0.26055	6.57735e+06	0.604602	3.07693e-90	6.99262e-87	33.4799	13.2645
Maml3	R62_KO	0.958027	0.267189	6.32358e+06	0.581275	1.86827e-33	3.53819e-31	59.9932	46.8877
Atp6v0b	R62_KO	0.926215	0.274016	6531668	0.600403	2.59769e-48	1.09324e-45	67.467	51.6445
Ptprn	R62_KO	0.921798	0.275722	6515953	0.598959	2.71034e-47	1.06199e-44	66.8245	49.9864
Sv2c	R62_KO	0.972513	0.276312	6401819	0.588467	1.00594e-38	2.59784e-36	62.8678	48.6545
Grin1	R62_KO	1.7813	0.281925	6528341	0.600097	7.6994e-45	2.65116e-42	91.7146	85.3221
Rap1gap	R62_KO	1.09471	0.303882	6603525	0.607008	4.31419e-53	2.33439e-50	73.7572	58.1408
mt-Cytb	R62_KO	1.01594	0.310815	6462702	0.594064	2.31859e-43	7.31837e-41	64.7616	48.3827
Sez6	R62_KO	0.827719	0.311653	6627152	0.60918	1.70385e-60	1.21006e-57	59.3507	41.533
Matk	R62_KO	0.944666	0.333967	6752294	0.620684	9.77202e-70	1.11039e-66	68.0758	47.7304
Baiap2	R62_KO	1.37183	0.337817	6724069	0.618089	2.01252e-62	1.52455e-59	83.6321	70.2365
Snap25	R62_KO	2.51167	0.34214	6.87195e+06	0.631682	3.71116e-76	5.27123e-73	98.3091	95.8141
Rsrp1	R62_KO	1.57692	0.351485	6789373	0.624092	3.56608e-68	3.43188e-65	89.4149	77.4939
mt-Co1	R62_KO	1.28076	0.353775	6544383	0.601572	5.58859e-48	2.26797e-45	73.3514	58.7932
mt-Co2	R62_KO	1.56751	0.360525	6.46401e+06	0.594184	1.64834e-40	4.80257e-38	80.2841	69.122
Pi4ka	R62_KO	1.62856	0.374801	6.8653e+06	0.631071	7.7401e-76	9.7723e-73	88.5357	78.3365
mt-Co3	R62_KO	1.80868	0.401694	6.53594e+06	0.600796	8.27103e-46	2.93699e-43	84.7819	73.4439
mt-Atp6	R62_KO	1.83674	0.447737	6.6129e+06	0.60787	2.75963e-52	1.36338e-49	84.3084	71.8945

## Sheet: iSPN
feature	group	avgExpr	logFC	statistic	auc	pval	padj	pct_in	pct_out
Dpp6	R62_KO	2.78189	-0.459624	1.827e+06	0.291004	4.82322e-144	5.48062e-140	99.292	99.676
Ralyl	R62_KO	1.50393	-0.399516	2450967	0.390388	3.78317e-41	2.38823e-38	77.7876	87.581
Fam155a	R62_KO	2.90013	-0.377669	2.48314e+06	0.395513	2.22159e-37	9.70918e-35	95.4425	98.0202
Cfap54	R62_KO	0.276727	-0.343819	2.42231e+06	0.385824	7.94478e-61	1.80553e-57	24.115	43.0886
Gabrg3	R62_KO	3.23047	-0.325564	2278383	0.362899	4.47258e-63	1.27055e-59	99.6018	99.964
2020-03-01	R62_KO	0.90539	-0.293326	2624637	0.41805	5.20283e-25	9.53545e-23	54.0708	66.8107
Zfp804a	R62_KO	1.72956	-0.290905	2582722	0.411374	2.16935e-27	5.03068e-25	86.9469	92.3326
Lsamp	R62_KO	4.84218	-0.287729	2.26448e+06	0.360685	4.53943e-65	1.71939e-61	100	100
Egfem1	R62_KO	1.12809	-0.286885	2.71805e+06	0.432929	3.77705e-17	3.35302e-15	58.1858	66.6667
Kctd8	R62_KO	1.45005	-0.284793	2.66853e+06	0.425042	3.12632e-20	3.77919e-18	74.3805	80.9935
Robo1	R62_KO	3.50301	-0.274843	2.40088e+06	0.38241	7.07562e-47	6.70002e-44	99.7345	99.856
Cntnap5a	R62_KO	1.49442	-0.274819	2641428	0.420725	2.44794e-22	3.52101e-20	78.4071	85.1332
Asic2	R62_KO	2.42416	-0.268816	2.76747e+06	0.4408	4.42679e-13	2.31298e-11	87.7434	92.6926
Dscaml1	R62_KO	0.913035	-0.265568	2.59976e+06	0.414087	1.06346e-26	2.2378e-24	61.4602	71.8143
Dmd	R62_KO	2.60101	-0.263672	2.47633e+06	0.394428	4.01445e-38	1.90067e-35	98.2301	99.1361
Nrxn1	R62_KO	2.93977	-0.263431	2.41692e+06	0.384965	6.1514e-45	4.99274e-42	99.0265	99.64
Rarb	R62_KO	2.4127	-0.262614	2487165	0.396154	6.07311e-37	2.55588e-34	96.9027	97.9482
Mgat4c	R62_KO	2.94232	-0.255561	2.53622e+06	0.403967	7.71552e-32	2.24799e-29	98.1416	99.0641
Tnr	R62_KO	1.48698	-0.249276	2594040	0.413177	2.19247e-26	4.52965e-24	83.8496	89.1289
Ntrk2	R62_KO	1.46121	-0.245305	2625432	0.418177	1.26715e-23	2.02797e-21	82.4779	89.1289
Xkr4	R62_KO	2.28232	-0.239774	2.55315e+06	0.406663	3.60435e-30	9.75148e-28	96.1947	97.8042
Rnf150	R62_KO	1.62026	-0.237644	2.61585e+06	0.416651	2.0409e-24	3.62355e-22	87.4336	91.4327
Nkain2	R62_KO	4.13886	-0.236311	2359708	0.375853	4.78687e-52	6.04369e-49	100	100
Ldb2	R62_KO	0.925108	-0.234488	2643046	0.420982	9.67264e-23	1.42741e-20	64.1593	72.1742
Cdh18	R62_KO	1.90132	-0.231956	2755778	0.438938	7.78233e-14	4.51177e-12	85.177	89.0569
Grm3	R62_KO	1.21655	-0.23074	2.67908e+06	0.426722	1.98452e-19	2.18933e-17	73.4071	80.1656
Lrrtm4	R62_KO	3.99204	-0.230119	2606620	0.415181	3.34901e-25	6.23849e-23	99.646	99.82
Erc2	R62_KO	2.94706	-0.228597	2.44931e+06	0.390124	3.76671e-41	2.38823e-38	99.3805	99.856
Nav3	R62_KO	1.62241	-0.228587	2.66794e+06	0.424947	4.18123e-20	4.9491e-18	85.9292	91.4327
Nyap2	R62_KO	0.967477	-0.225494	2.64068e+06	0.420605	8.75352e-23	1.30877e-20	65.6195	75.8459
Hs3st5	R62_KO	0.97698	-0.225158	2689949	0.428453	5.78154e-19	6.1977e-17	63.3186	71.7063
Kctd16	R62_KO	2.66268	-0.220426	2.66232e+06	0.424052	1.59278e-20	1.98887e-18	97.6106	98.8481
Ncam2	R62_KO	2.02896	-0.219979	2716451	0.432674	1.80207e-16	1.48383e-14	90.1327	93.0526
Lrp1b	R62_KO	4.11422	-0.213808	2559985	0.407753	1.65553e-29	4.27542e-27	99.823	99.856
Syne1	R62_KO	2.18589	-0.213696	2587087	0.412069	5.80689e-27	1.2938e-24	96.1062	97.7682
Arhgap26	R62_KO	1.62699	-0.213539	2652204	0.422441	2.34447e-21	3.17145e-19	87.7434	91.5767
Acyp2	R62_KO	0.792184	-0.213388	2.69057e+06	0.428552	2.43057e-19	2.65563e-17	56.6372	65.8747
Rbfox1	R62_KO	5.28795	-0.213119	2.24909e+06	0.358233	2.58003e-67	1.46584e-63	100	100
Galnt13	R62_KO	2.77435	-0.210289	2.57773e+06	0.410579	7.92577e-28	1.91618e-25	99.1593	99.46
Dclk1	R62_KO	1.40419	-0.208707	2694692	0.429209	4.20813e-18	4.12215e-16	81.0619	86.8251
Fam126a	R62_KO	0.100854	-0.20393	2.6353e+06	0.419748	2.56782e-49	2.65256e-46	9.0708	24.658
Magi2	R62_KO	3.44556	-0.200729	2.48792e+06	0.396275	7.34149e-37	2.97933e-34	99.7788	99.928
Brinp3	R62_KO	1.12563	-0.200192	2786213	0.443786	2.75121e-12	1.24858e-10	63.9823	71.1303
Thrb	R62_KO	1.53485	-0.199785	2.7098e+06	0.431615	5.59024e-17	4.849e-15	84.2035	87.221
Mei4	R62_KO	0.780601	-0.199308	2732728	0.435267	1.88596e-16	1.54174e-14	52.9204	61.879
Unc5d	R62_KO	0.977608	-0.189757	2797662	0.44561	7.30396e-12	3.00706e-10	56.4602	65.2988
Rora	R62_KO	3.9904	-0.183688	2536033	0.403938	7.39913e-32	2.21253e-29	99.9558	100
Sgcd	R62_KO	1.50772	-0.179445	2781314	0.443006	2.89636e-12	1.30084e-10	81.8584	86.1771
Lingo2	R62_KO	0.222546	-0.179216	2705052	0.430859	1.69423e-27	4.01075e-25	19.8673	32.1814
Slc22a23	R62_KO	0.81838	-0.176922	2.73034e+06	0.434887	3.60995e-16	2.82896e-14	60.7522	66.9906
Grik2	R62_KO	2.63647	-0.171567	2.70492e+06	0.430838	2.74806e-17	2.47827e-15	98.4513	99.1721
Pcdh11x	R62_KO	1.24847	-0.17121	2816712	0.448644	2.44009e-10	7.78842e-09	72.1239	76.8898
Camk4	R62_KO	1.75401	-0.170962	2.73239e+06	0.435214	2.28638e-15	1.64431e-13	90.2655	91.4327
Slc35f1	R62_KO	1.60961	-0.169872	2772095	0.441537	8.38194e-13	4.15913e-11	86.5044	89.1649
Gramd1b	R62_KO	0.823928	-0.16981	2762597	0.440024	5.4557e-14	3.22881e-12	58.7611	67.1346
Map2	R62_KO	1.86326	-0.16903	2.74286e+06	0.436881	1.1737e-14	7.75395e-13	92.5664	94.7804
Spock1	R62_KO	1.2138	-0.168516	2766175	0.440594	2.84988e-13	1.52034e-11	76.1062	80.0576
Gpc6	R62_KO	1.56271	-0.166247	2867335	0.456707	1.0599e-07	2.08008e-06	76.9469	81.8215
Cdk14	R62_KO	0.706327	-0.166012	2770133	0.441225	7.2404e-14	4.21911e-12	52.7434	61.0511
Neto1	R62_KO	1.48817	-0.164877	2778322	0.442529	1.97189e-12	9.18303e-11	84.7788	87.401
Ptprd	R62_KO	3.96653	-0.164496	2657159	0.42323	6.1724e-21	7.97011e-19	99.7788	99.928
Klhl7	R62_KO	0.660198	-0.162651	2724745	0.433995	4.19289e-17	3.69332e-15	51.9027	61.4831
Adk	R62_KO	0.987911	-0.16247	2.7935e+06	0.444946	8.01987e-12	3.2663e-10	65.8407	70.8783
Sema3e	R62_KO	0.748609	-0.159225	2795303	0.445234	3.28683e-12	1.45891e-10	54.4248	60.4032
Gmds	R62_KO	1.03406	-0.158803	2782916	0.443261	2.39074e-12	1.09984e-10	69.9115	74.946
Slc24a3	R62_KO	0.563204	-0.158761	2800674	0.446089	8.06542e-13	4.01962e-11	42.2566	50.108
Reln	R62_KO	0.740182	-0.158282	2.81524e+06	0.448409	4.26054e-11	1.5369e-09	52.0796	59.2513
Gria1	R62_KO	3.47423	-0.157099	2.5944e+06	0.413235	2.69942e-26	5.47742e-24	99.9558	100
Dst	R62_KO	1.52966	-0.156311	2.77035e+06	0.441259	6.60285e-13	3.31983e-11	87.2124	90.3888
Negr1	R62_KO	3.41943	-0.156095	2680508	0.426949	4.17344e-19	4.51646e-17	99.9115	100
Robo2	R62_KO	2.86173	-0.155631	2721591	0.433493	4.21758e-16	3.23813e-14	99.0265	99.3161
Klhl1	R62_KO	0.741844	-0.155594	2814822	0.448343	4.08033e-11	1.48605e-09	51.7699	59.6832
Rit2	R62_KO	1.3619	-0.154788	2782713	0.443229	3.45855e-12	1.52324e-10	81.9027	84.5932
Dlg2	R62_KO	5.36626	-0.154033	2.31122e+06	0.368129	1.7162e-58	3.25019e-55	100	100
Macrod2	R62_KO	3.61811	-0.151681	2.69134e+06	0.428675	2.75168e-18	2.79172e-16	99.7788	99.892
Adgrb3	R62_KO	4.20074	-0.150359	2538735	0.404368	1.37705e-31	3.91186e-29	100	99.964
Kalrn	R62_KO	2.52759	-0.149371	2.70145e+06	0.430284	1.53489e-17	1.40653e-15	98.6283	98.6681
Cdh10	R62_KO	1.02986	-0.149062	2820632	0.449268	3.18835e-10	9.8987e-09	67.0354	72.2822
Sgcz	R62_KO	4.8428	-0.148449	2.63297e+06	0.419378	6.3253e-23	9.58326e-21	99.9558	100
Grid2	R62_KO	3.7923	-0.148423	2.71113e+06	0.431827	7.69421e-17	6.52457e-15	99.469	99.784
Arpp21	R62_KO	2.22335	-0.145194	2762427	0.439997	2.18543e-13	1.18818e-11	96.5487	97.1922
Dlgap1	R62_KO	2.46451	-0.145025	2.80281e+06	0.44643	5.74295e-11	2.00175e-09	97.0796	98.2361
Cntnap2	R62_KO	4.51489	-0.144742	2.67202e+06	0.425597	9.22886e-20	1.03829e-17	100	100
Shc3	R62_KO	0.545394	-0.144715	2.78893e+06	0.444219	2.35864e-13	1.27625e-11	44.5575	52.4478
Hs6st3	R62_KO	3.46339	-0.144331	2795478	0.445262	2.18446e-11	8.35758e-10	98.8496	98.8841
Ctnnd2	R62_KO	3.21357	-0.14391	2657259	0.423246	6.28754e-21	8.02757e-19	99.6903	99.892
Csmd3	R62_KO	3.26617	-0.142983	2.72168e+06	0.433508	4.28011e-16	3.26409e-14	99.469	99.676
Gnao1	R62_KO	1.60889	-0.142836	2.78381e+06	0.443403	4.40229e-12	1.90202e-10	89.115	91.0727
Tmem178b	R62_KO	2.20839	-0.142688	2.78493e+06	0.443581	5.24687e-12	2.21636e-10	96.1504	97.1202
Epha6	R62_KO	2.81392	-0.142592	2.7918e+06	0.444676	1.33546e-11	5.28742e-10	98.3628	98.4521
Tmeff2	R62_KO	0.914732	-0.142137	2.838e+06	0.452034	2.06168e-09	5.68508e-08	62.2566	67.5666
Grm8	R62_KO	0.73324	-0.139125	2891327	0.460529	2.18261e-07	3.91183e-06	45.531	51.7639
Dab1	R62_KO	2.81603	-0.138997	2.81736e+06	0.448748	3.68345e-10	1.13428e-08	97.8761	98.4881
Cacna2d1	R62_KO	1.92237	-0.138417	2.8128e+06	0.448021	2.06414e-10	6.70138e-09	93.0531	94.7084
Kcnip4	R62_KO	4.62044	-0.138372	2.74033e+06	0.436478	8.0244e-15	5.39534e-13	100	100
Chrm3	R62_KO	1.21885	-0.136041	2910472	0.463578	6.37746e-06	7.87878e-05	68.1416	71.9222
Srrm2	R62_KO	1.13564	-0.13525	2809837	0.447549	1.12807e-10	3.81495e-09	75.708	79.5536
Gpr149	R62_KO	0.299447	-0.135087	2841852	0.452648	4.62588e-13	2.38927e-11	24.2035	32.6854
Ccser1	R62_KO	2.82113	-0.134949	2784326	0.443485	4.83555e-12	2.06565e-10	99.115	99.712
Sntg1	R62_KO	2.58125	-0.134679	2.77658e+06	0.442251	1.65e-12	7.81207e-11	98.3628	98.8121
Ptprn2	R62_KO	2.53996	-0.13437	2757274	0.439177	1.0285e-13	5.78559e-12	98.7168	99.0641
Dip2c	R62_KO	2.0285	-0.134163	2793030	0.444872	1.57143e-11	6.20007e-10	94.9115	95.6803
Nbea	R62_KO	2.60788	-0.133942	2737214	0.435982	4.96191e-15	3.43794e-13	99.0708	99.2081
Fam49a	R62_KO	0.720725	-0.13235	2.83566e+06	0.451662	8.63008e-10	2.52741e-08	54.469	61.879
Wdr17	R62_KO	0.814627	-0.131362	2.82338e+06	0.449707	2.94842e-10	9.25493e-09	60.7522	66.1987
Nell1	R62_KO	1.03142	-0.130395	2.86876e+06	0.456934	8.52505e-08	1.73914e-06	66.0619	69.2945
Celf2	R62_KO	5.00857	-0.130348	2472247	0.393778	1.42468e-38	7.77882e-36	100	100
Rims2	R62_KO	2.52796	-0.130113	2.79831e+06	0.445713	3.18063e-11	1.18109e-09	98.2743	98.3801
Tenm1	R62_KO	1.09884	-0.130105	2864110	0.456193	6.35109e-08	1.33891e-06	71.5929	74.55
Arhgap6	R62_KO	0.425318	-0.12964	2840299	0.452401	4.43273e-11	1.58393e-09	35.708	42.8726
Nrxn3	R62_KO	5.40812	-0.128123	2.47228e+06	0.393783	1.43761e-38	7.77882e-36	100	100
Col25a1	R62_KO	0.478973	-0.127682	2868318	0.456864	2.71116e-09	7.28295e-08	36.1062	43.5565
Alcam	R62_KO	2.14202	-0.126826	2854790	0.454709	3.05393e-08	6.92652e-07	94.7345	95.2124
Pclo	R62_KO	1.65482	-0.126457	2.8464e+06	0.453373	1.17142e-08	2.84418e-07	89.3805	91.2167
Mdga2	R62_KO	3.65029	-0.126211	2705814	0.43098	3.18929e-17	2.85354e-15	99.9558	99.928
Srgap2	R62_KO	1.00269	-0.125366	2851667	0.454212	1.465e-08	3.50458e-07	68.9381	73.3621
Pdzrn4	R62_KO	0.508856	-0.125303	2925837	0.466025	1.75976e-06	2.49639e-05	34.6018	39.8128
Nlgn1	R62_KO	4.453	-0.124602	2782371	0.443174	3.69461e-12	1.61469e-10	99.8673	99.964
Lmo7	R62_KO	1.27351	-0.124074	2847021	0.453471	1.14052e-08	2.7751e-07	79.469	82.5414
Frmd4a	R62_KO	2.47538	-0.124049	2.8276e+06	0.450378	1.29839e-09	3.71629e-08	96.4602	96.9762
Samd5	R62_KO	0.497705	-0.122893	2845412	0.453215	2.88871e-10	9.09264e-09	39.4248	47.5162
Kansl1l	R62_KO	0.604755	-0.122102	2863032	0.456022	1.02358e-08	2.52299e-07	48.3186	53.0238
Setbp1	R62_KO	1.48695	-0.121887	2869674	0.45708	1.49274e-07	2.80261e-06	85.7522	88.5889
Nkain3	R62_KO	1.41356	-0.121606	2889513	0.46024	1.04161e-06	1.58444e-05	78.4956	79.8416
Thsd7a	R62_KO	1.63192	-0.120972	2916980	0.464615	1.45548e-05	0.00016151	82.6549	85.4572
Ppfia2	R62_KO	1.74385	-0.118862	2868608	0.45691	1.35749e-07	2.6012e-06	89.7788	91.6127
Mllt3	R62_KO	1.30144	-0.11883	2.85123e+06	0.454142	1.86084e-08	4.35973e-07	80.4425	82.7934
Dok6	R62_KO	1.81299	-0.118415	2832608	0.451176	2.35657e-09	6.37564e-08	92.3894	93.1246
Il1rapl1	R62_KO	3.85553	-0.117597	2.73767e+06	0.436054	5.32447e-15	3.66678e-13	99.823	99.964
Htr2c	R62_KO	1.48523	-0.117121	2901356	0.462126	3.39178e-06	4.4867e-05	80.354	82.6134
Olfm3	R62_KO	0.723842	-0.116464	2899686	0.46186	8.64221e-07	1.33245e-05	50	56.0475
Clvs1	R62_KO	1.28675	-0.116032	2.86743e+06	0.456722	1.09844e-07	2.14461e-06	79.5133	82.5054
5730522E02Rik	R62_KO	2.13801	-0.115914	2889499	0.460237	1.15995e-06	1.73657e-05	93.8496	95.2484
Zdhhc14	R62_KO	1.43722	-0.115033	2.87018e+06	0.457161	1.56107e-07	2.89844e-06	84.823	87.149
Ctnna2	R62_KO	3.62313	-0.114531	2.78011e+06	0.442814	2.70218e-12	1.23313e-10	99.8673	99.928
Ppp2r2b	R62_KO	2.15755	-0.113921	2868336	0.456867	1.33257e-07	2.55778e-06	95.6637	96.4003
Chl1	R62_KO	0.38708	-0.113413	2858727	0.455336	2.76527e-10	8.72826e-09	32.6106	40.3888
Grid1	R62_KO	2.11206	-0.113269	2.84833e+06	0.45368	1.47719e-08	3.52633e-07	94.469	95.3924
Nalcn	R62_KO	1.60152	-0.113267	2874964	0.457922	2.62802e-07	4.65868e-06	88.2301	89.9208
Sobp	R62_KO	0.499229	-0.113028	2.89079e+06	0.460443	6.7401e-08	1.40528e-06	38.5398	44.4564
Mctp1	R62_KO	2.12247	-0.113028	2850906	0.45409	1.97761e-08	4.5954e-07	94.9115	95.2124
Snd1	R62_KO	0.722102	-0.111381	2873966	0.457763	8.75092e-08	1.77565e-06	56.2389	61.4111
Gabarapl2	R62_KO	0.0817943	-0.110922	2820852	0.449303	1.45365e-25	2.79964e-23	7.9646	17.9266
D430041D05Rik	R62_KO	1.15336	-0.110419	2885954	0.459673	6.99024e-07	1.10396e-05	75.3982	78.1497
Pdss2	R62_KO	0.672089	-0.109723	2877132	0.458268	8.32021e-08	1.7004e-06	51.6372	56.9834
Cmss1	R62_KO	1.41013	-0.108971	2880378	0.458785	4.48312e-07	7.54692e-06	84.3363	86.5731
Erc1	R62_KO	0.645732	-0.10762	2.88155e+06	0.458972	1.28345e-07	2.48871e-06	50.8407	56.4795
Clec16a	R62_KO	0.461363	-0.107497	2877806	0.458375	1.74635e-08	4.10845e-07	40.0885	45.5364
Pex5l	R62_KO	0.426842	-0.107476	2.90649e+06	0.462944	1.77487e-07	3.23721e-06	33.9823	39.9208
Shank2	R62_KO	0.765406	-0.106359	2.89065e+06	0.460421	5.72095e-07	9.32671e-06	57.3894	62.383
Prickle2	R62_KO	1.42073	-0.104964	2892285	0.460681	1.453e-06	2.13589e-05	83.5398	84.3772
Trim9	R62_KO	0.953771	-0.104195	2884848	0.459497	5.07238e-07	8.36537e-06	68.1416	70.8063
Gulp1	R62_KO	0.426021	-0.103023	2886536	0.459765	1.42527e-08	3.41674e-07	33.0973	40.6048
Ttc8	R62_KO	0.390946	-0.102814	2877621	0.458345	4.95192e-09	1.27883e-07	33.8938	40.8207
St6galnac3	R62_KO	0.461923	-0.101846	2908043	0.463191	3.54886e-07	6.13785e-06	36.5044	42.4046
Bcas3	R62_KO	1.32743	-0.101664	2902717	0.462343	3.89021e-06	5.09268e-05	80.8407	83.6573
Cacna1c	R62_KO	2.68694	-0.1012	2869410	0.457038	1.49452e-07	2.80261e-06	99.0708	99.1361
Tenm2	R62_KO	3.99757	-0.100873	2.88245e+06	0.459114	5.75403e-07	9.3538e-06	99.6903	99.532
Pou6f2	R62_KO	0.350795	-0.100751	2.93052e+06	0.466771	5.50951e-07	9.00786e-06	26.8584	32.7214
Nhs	R62_KO	0.412762	-0.10035	2930074	0.4667	1.49795e-06	2.18782e-05	31.3717	36.6451
Chsy3	R62_KO	1.63037	-0.100171	2931122	0.466867	5.00536e-05	0.000471217	86.4159	88.2289
Pkig	R62_KO	0.529104	0.10032	3386039	0.539326	5.0239e-08	1.07914e-06	43.6726	36.0691
Rab34	R62_KO	0.307701	0.100613	3414483	0.543856	4.61319e-13	2.38927e-11	28.0973	19.4384
Numb	R62_KO	0.664562	0.101282	3.38243e+06	0.538751	3.58426e-07	6.18967e-06	53.4071	45.2484
Itm2b	R62_KO	0.459837	0.101292	3.39855e+06	0.541318	2.71779e-09	7.28356e-08	39.2478	30.9935
Pak6	R62_KO	0.292084	0.101359	3413761	0.543741	7.96283e-14	4.59298e-12	26.1062	17.3866
Gnas	R62_KO	0.499821	0.101385	3390018	0.53996	1.91632e-08	4.47129e-07	42.3009	33.6213
Iqsec3	R62_KO	0.213861	0.10139	3425121	0.545551	3.93112e-20	4.70204e-18	19.2478	10.0072
Rnf112	R62_KO	0.449772	0.101524	3.40516e+06	0.542372	8.66204e-10	2.53025e-08	38.8053	30.2736
Csf2ra	R62_KO	0.415923	0.101737	3409146	0.543006	1.83607e-10	6.10036e-09	36.3717	27.7898
Cstf3	R62_KO	0.898882	0.101891	3360505	0.535259	9.3288e-06	0.000109584	65.885	59.2873
Dlgap4	R62_KO	0.994036	0.102003	3365818	0.536105	6.82385e-06	8.33757e-05	69.3363	64.4348
Celf3	R62_KO	0.437006	0.102385	3403755	0.542148	8.05202e-10	2.37034e-08	37.8761	29.6256
Syp	R62_KO	0.482547	0.102472	3.39607e+06	0.540924	6.83628e-09	1.74563e-07	41.1062	33.0094
Wdr33	R62_KO	0.887237	0.102725	3356717	0.534656	1.28704e-05	0.000145664	66.1504	57.9914
Zcchc18	R62_KO	0.432028	0.103194	3399402	0.541454	1.22944e-09	3.52782e-08	37.1681	29.1577
Hhipl1	R62_KO	0.137783	0.103266	3443315	0.548449	1.64778e-37	7.48947e-35	13.0531	3.38373
Gpi1	R62_KO	0.694858	0.103329	3385895	0.539303	3.0478e-07	5.34447e-06	55.6637	46.8323
Pacsin1	R62_KO	1.03886	0.103435	3345139	0.532811	4.54533e-05	0.000433657	72.5664	64.7228
Rev1	R62_KO	0.710901	0.103558	3380646	0.538467	6.11032e-07	9.84846e-06	56.2389	48.5241
Btaf1	R62_KO	0.895904	0.103629	3379495	0.538284	1.47683e-06	2.15975e-05	65.8407	58.9993
Penk	R62_KO	0.393523	0.103765	3.42071e+06	0.544849	9.61712e-12	3.87515e-10	34.4248	25.306
Ppp3ca	R62_KO	3.45564	0.103817	3502074	0.557808	1.56656e-12	7.47933e-11	99.9115	99.892
Stmn3	R62_KO	0.531938	0.104325	3389032	0.539803	3.73899e-08	8.29807e-07	44.115	36.3571
Kif5c	R62_KO	0.998181	0.104649	3362743	0.535615	9.01847e-06	0.000106747	69.646	63.8589
Brd4	R62_KO	0.838268	0.104713	3381535	0.538609	9.72662e-07	1.48155e-05	62.3894	55.6156
Kif1b	R62_KO	1.56632	0.104881	3.38552e+06	0.539243	1.55189e-06	2.25213e-05	87.9204	85.3132
Zfp950	R62_KO	0.961824	0.1051	3.36336e+06	0.535713	8.03116e-06	9.58594e-05	68.4513	62.023
Tmod1	R62_KO	0.331695	0.105428	3.42728e+06	0.545895	6.87377e-14	4.02611e-12	29.0708	19.9064
Arhgap10	R62_KO	1.05977	0.105637	3362981	0.535653	9.36573e-06	0.000109758	71.6372	65.4068
Kansl1	R62_KO	1.75287	0.105719	3.38304e+06	0.538848	2.0049e-06	2.80217e-05	90.6195	88.5889
Cdk17	R62_KO	1.23607	0.105897	3368456	0.536525	6.88167e-06	8.39919e-05	79.0708	73.5061
Tmem164	R62_KO	0.553979	0.105909	3378872	0.538184	9.84527e-08	1.95239e-06	42.5221	35.2412
Vdac1	R62_KO	0.373945	0.10607	3.40982e+06	0.543114	2.89277e-11	1.08127e-09	32.6106	24.406
Kif5b	R62_KO	0.65759	0.106154	3390228	0.539993	1.32268e-07	2.5474e-06	51.9469	44.7444
Vmp1	R62_KO	0.685835	0.106263	3.3854e+06	0.539224	3.05731e-07	5.35289e-06	54.1593	47.2282
Syt6	R62_KO	1.01731	0.106517	3.35733e+06	0.534753	1.46555e-05	0.000162469	69.3363	63.6789
Gprin3	R62_KO	0.957903	0.106915	3.37221e+06	0.537123	3.15697e-06	4.21041e-05	65.7965	60.4392
Atpif1	R62_KO	0.305024	0.107116	3420842	0.544869	4.13566e-14	2.46039e-12	26.9912	18.1066
Chpf2	R62_KO	0.25771	0.107235	3439006	0.547762	7.87745e-18	7.35725e-16	23.8053	14.3988
Atp5b	R62_KO	0.375668	0.107396	3429625	0.546268	1.01796e-12	4.96441e-11	33.3186	24.0461
Slc35f3	R62_KO	0.935997	0.107551	3374194	0.537439	2.59339e-06	3.51236e-05	66.8142	59.5032
Kcnd3	R62_KO	0.789531	0.107574	3374304	0.537457	1.14865e-06	1.72647e-05	55.9292	48.0562
Atxn2l	R62_KO	0.378808	0.107808	3.41967e+06	0.544683	8.51251e-12	3.45456e-10	33.4071	25.162
Drg1	R62_KO	0.592775	0.108366	3.39424e+06	0.540633	4.50075e-08	9.75993e-07	48.5398	40.4248
Napb	R62_KO	0.463201	0.108555	3417223	0.544293	1.94026e-10	6.40906e-09	39.6903	30.9575
Pcnx2	R62_KO	0.750342	0.108567	3386786	0.539445	3.84053e-07	6.55254e-06	58.6726	50.18
Srek1	R62_KO	1.0869	0.108827	3381330	0.538576	1.80171e-06	2.55272e-05	74.469	68.4665
Psma3	R62_KO	0.537885	0.109083	3.41054e+06	0.543228	2.75233e-09	7.35875e-08	45.177	36.8611
Eef1a1	R62_KO	0.414912	0.10913	3421747	0.545013	1.59091e-11	6.25521e-10	35.6637	26.6379
Slc9a1	R62_KO	0.420393	0.109234	3423549	0.5453	1.81723e-11	7.04751e-10	36.2389	27.7538
Nsg2	R62_KO	1.14406	0.109307	3382662	0.538788	1.67876e-06	2.41159e-05	76.0619	71.0223
5330417C22Rik	R62_KO	0.764188	0.109446	3379350	0.53826	7.75004e-07	1.21133e-05	57.2566	49.568
Tra2b	R62_KO	0.502503	0.109652	3431934	0.546636	6.01912e-11	2.0916e-09	43.2301	33.4053
Ppp1r9a	R62_KO	2.37976	0.110128	3.40375e+06	0.542147	2.55531e-07	4.53688e-06	98.2743	96.9762
Ank3	R62_KO	4.13011	0.110229	3583698	0.570809	4.79404e-18	4.65595e-16	100	100
Agfg2	R62_KO	0.339582	0.110263	3433387	0.546867	3.6345e-14	2.18513e-12	29.823	20.4824
Kcnma1	R62_KO	2.71555	0.110322	3.47622e+06	0.55369	5.20311e-11	1.83043e-09	99.2035	99.1721
Man2a2	R62_KO	0.596604	0.110402	3406877	0.542645	1.00445e-08	2.48121e-07	49.2478	40.4608
Tyro3	R62_KO	0.232664	0.110607	3458380	0.550848	4.30781e-22	6.1187e-20	21.8584	11.8071
Baz1a	R62_KO	0.190311	0.11098	3.445e+06	0.548718	8.54089e-27	1.83114e-24	16.9469	7.23542
Hnrnph3	R62_KO	0.578944	0.111116	3410651	0.543246	4.93464e-09	1.27727e-07	47.7434	39.5968
Rbm26	R62_KO	1.14799	0.111459	3.3775e+06	0.537966	2.73501e-06	3.68659e-05	75.9292	70.2304
Pde4a	R62_KO	0.448607	0.11163	3420055	0.544744	5.43357e-11	1.89974e-09	37.8761	28.5817
Lrrk2	R62_KO	0.84015	0.111663	3373376	0.537309	2.02849e-06	2.82543e-05	61.3717	53.9957
Crim1	R62_KO	0.464968	0.111794	3409340	0.543037	2.14307e-10	6.91809e-09	36.9027	28.1497
Pias1	R62_KO	0.846922	0.112119	3384492	0.539079	7.26543e-07	1.14187e-05	62.3451	56.0115
Mycbp2	R62_KO	2.26742	0.112135	3409217	0.543018	1.44001e-07	2.73626e-06	97.8319	96.1123
Stx5a	R62_KO	0.451947	0.112372	3429870	0.546307	1.81488e-11	7.04751e-10	39.0265	29.5536
Rbms3	R62_KO	1.61635	0.112448	3.36642e+06	0.536202	9.19148e-06	0.000108456	85.9735	82.6854
Syn1	R62_KO	0.809156	0.112533	3400373	0.541609	9.68966e-08	1.92826e-06	59.823	51.5119
Gad2	R62_KO	0.820498	0.112679	3385012	0.539162	5.87731e-07	9.52694e-06	60.7965	53.4197
Syt11	R62_KO	0.794246	0.112796	3.37801e+06	0.538048	1.15123e-06	1.72806e-05	60	52.7718
Srpk2	R62_KO	1.30063	0.112833	3.37195e+06	0.537082	5.19815e-06	6.57756e-05	81.5487	76.1699
Strip2	R62_KO	0.624498	0.112988	3395260	0.540795	4.3234e-08	9.44746e-07	49.0265	40.8927
Mbtd1	R62_KO	0.954259	0.113464	3382029	0.538687	1.29413e-06	1.92891e-05	67.9646	61.5551
Tesc	R62_KO	0.315307	0.113593	3.43505e+06	0.547133	3.82126e-15	2.69696e-13	27.7434	18.5385
Psip1	R62_KO	0.803311	0.113748	3402271	0.541911	9.22621e-08	1.85553e-06	60.7965	53.9237
Scrn1	R62_KO	0.477169	0.113916	3433228	0.546842	2.6603e-11	1.00096e-09	41.3717	31.7495
Cap2	R62_KO	1.29747	0.113942	3.39106e+06	0.540126	8.09969e-07	1.25562e-05	80.708	75.6659
Ppm1h	R62_KO	0.780425	0.114102	3.38681e+06	0.539449	3.98156e-07	6.76271e-06	58.4956	51.0799
Rabep1	R62_KO	1.18697	0.114105	3395649	0.540857	4.66941e-07	7.80272e-06	77.2566	71.6343
Dtx3	R62_KO	0.600557	0.114165	3422110	0.545071	1.59154e-09	4.48751e-08	49.7345	41.2167
Ndfip1	R62_KO	0.73502	0.114165	3404610	0.542284	4.47657e-08	9.72606e-07	57.2124	48.7401
Smim13	R62_KO	0.356979	0.114209	3451744	0.549791	3.91228e-15	2.74415e-13	31.8142	21.8862
Ppp1r16b	R62_KO	0.586057	0.11422	3405937	0.542495	6.93664e-09	1.76729e-07	46.5487	38.2649
Ssbp4	R62_KO	0.421679	0.114541	3.43708e+06	0.547456	2.24565e-12	1.03729e-10	36.7257	27.8978
Efr3b	R62_KO	0.57356	0.114795	3416162	0.544124	1.67512e-09	4.71147e-08	46.4602	37.761
Tmem158	R62_KO	0.2859	0.114982	3454138	0.550173	5.24029e-18	5.04623e-16	26.1062	16.4867
Tmem181a	R62_KO	0.846039	0.115922	3411016	0.543304	4.12136e-08	9.04074e-07	63.0531	55.9395
Gsdme	R62_KO	0.568825	0.116847	3436797	0.547411	8.70857e-11	2.98959e-09	46.3717	37.293
Nrxn2	R62_KO	0.628546	0.117177	3.4159e+06	0.544082	4.30698e-09	1.11991e-07	50.9292	42.0086
Nsun7	R62_KO	0.40126	0.11719	3445650	0.548821	8.7469e-14	5.01975e-12	34.4248	24.406
Zfp799	R62_KO	0.403508	0.117837	3448764	0.549317	1.18061e-13	6.57609e-12	35.6195	25.8819
Ptk2b	R62_KO	0.922473	0.117856	3378500	0.538125	1.68089e-06	2.41162e-05	67.3009	58.8193
Aldoa	R62_KO	0.326246	0.117885	3455084	0.550323	1.20908e-16	1.0102e-14	28.8938	19.0785
P2ry14	R62_KO	0.582789	0.117929	3.41431e+06	0.543829	2.0016e-09	5.54735e-08	45.9735	37.617
Scai	R62_KO	0.904548	0.118182	3396704	0.541025	2.38614e-07	4.26315e-06	65.885	57.8474
Adgrb2	R62_KO	0.404899	0.118715	3448726	0.549311	1.01187e-13	5.72033e-12	35.3097	25.6659
Acvr1c	R62_KO	0.319193	0.119021	3458964	0.550941	8.39618e-18	7.75657e-16	27.6991	17.3506
Comt	R62_KO	0.636083	0.119742	3418030	0.544421	3.13226e-09	8.29648e-08	50.6195	41.8287
Slc32a1	R62_KO	0.318099	0.119956	3464417	0.55181	7.89919e-18	7.35725e-16	28.5398	18.3945
Mdh1	R62_KO	0.42431	0.120062	3460238	0.551144	3.43764e-14	2.08887e-12	37.3451	26.9978
Chd4	R62_KO	0.786241	0.120275	3408250	0.542864	3.81051e-08	8.44032e-07	60.0442	50.7199
Atp2c1	R62_KO	0.955146	0.120353	3393339	0.540489	4.09547e-07	6.9458e-06	68.6726	61.2671
Sipa1l1	R62_KO	1.96436	0.12056	3396457	0.540985	5.3811e-07	8.8233e-06	95.1327	91.9726
Dhdds	R62_KO	0.593676	0.120788	3.43251e+06	0.546727	2.68809e-10	8.50829e-09	48.9381	38.8409
Luc7l3	R62_KO	0.950097	0.120973	3403118	0.542046	1.4477e-07	2.74628e-06	68.6726	61.3031
Syt7	R62_KO	0.439575	0.121463	3439084	0.547775	1.9615e-12	9.17223e-11	37.3451	28.1138
Abi2	R62_KO	0.913057	0.121725	3404697	0.542298	1.04117e-07	2.05041e-06	66.1062	58.7473
Acp1	R62_KO	0.371895	0.122006	3.45451e+06	0.550232	5.88991e-15	4.00761e-13	32.9646	23.0742
Dhx30	R62_KO	0.704771	0.122042	3432455	0.546719	1.17465e-09	3.3877e-08	55.7965	46.9402
Cep164	R62_KO	0.580113	0.122548	3446021	0.54888	3.72875e-11	1.37119e-09	48.3628	38.9489
Pja2	R62_KO	0.883041	0.122834	3407429	0.542733	6.89996e-08	1.43335e-06	64.6018	57.1994
Akap11	R62_KO	0.724398	0.122996	3437835	0.547576	7.06932e-10	2.10284e-08	56.7257	48.4521
Slc6a6	R62_KO	1.13249	0.123615	3403507	0.542108	1.93428e-07	3.50546e-06	75.8407	69.0785
Cst3	R62_KO	0.407794	0.123792	3.47393e+06	0.553325	7.12227e-16	5.35962e-14	35.885	24.73
Dot1l	R62_KO	0.727089	0.123793	3428009	0.546011	2.25237e-09	6.13756e-08	56.1062	47.6602
Akt3	R62_KO	1.4971	0.123968	3421782	0.545019	3.467e-08	7.75502e-07	85.885	82.4334
Slc6a17	R62_KO	0.517808	0.124092	3.44389e+06	0.54854	1.22794e-11	4.89584e-10	43.5841	34.3053
Dtna	R62_KO	1.3009	0.124235	3.41561e+06	0.544035	6.09032e-08	1.28632e-06	80.0442	75.09
Ube2r2	R62_KO	0.609301	0.124307	3440144	0.547944	1.01635e-10	3.44741e-09	48.9823	39.5608
Snca	R62_KO	0.995265	0.124973	3.40168e+06	0.541817	1.68422e-07	3.09173e-06	67.7876	61.879
Galnt1	R62_KO	0.51611	0.125054	3462555	0.551513	5.67627e-13	2.89235e-11	43.8938	33.5133
Bcr	R62_KO	0.955469	0.125446	3.40193e+06	0.541858	1.5889e-07	2.9405e-06	68.0088	60.7271
Kifc2	R62_KO	0.422085	0.125697	3474447	0.553407	2.14932e-15	1.55559e-13	37.4336	26.5659
Nebl	R62_KO	2.21466	0.127228	3420295	0.544782	4.35139e-08	9.49037e-07	96.8142	94.7804
Plxna4	R62_KO	0.965387	0.127747	3.38367e+06	0.538948	8.92952e-07	1.36931e-05	64.469	57.6314
Kctd17	R62_KO	0.425554	0.127783	3483250	0.55481	3.93112e-16	3.05954e-14	37.6106	26.4219
Snph	R62_KO	0.590676	0.128291	3.45768e+06	0.550737	7.03305e-12	2.90606e-10	48.9381	38.8769
Eno2	R62_KO	0.525542	0.128322	3465422	0.55197	3.96126e-13	2.08388e-11	44.4248	33.5853
Ptprs	R62_KO	0.75572	0.128397	3.42599e+06	0.54569	3.64879e-09	9.61833e-08	57.5221	49.496
Epo	R62_KO	0.448161	0.128442	3472573	0.553109	9.15288e-15	6.11789e-13	38.9381	28.5457
Srsf11	R62_KO	1.12318	0.130456	3.42349e+06	0.545291	2.14039e-08	4.93331e-07	75.7965	68.7905
Atp5a1	R62_KO	0.524492	0.130568	3474496	0.553415	9.03358e-14	5.14913e-12	44.292	33.8373
Cdyl2	R62_KO	0.422459	0.130583	3463237	0.551622	3.76141e-15	2.6713e-13	34.7788	24.586
Far1	R62_KO	0.726788	0.130845	3446897	0.549019	2.07146e-10	6.70599e-09	56.3274	48.4521
Vamp4	R62_KO	0.413661	0.131757	3481527	0.554535	1.94013e-16	1.57469e-14	35.9292	25.198
Calm1	R62_KO	0.646737	0.132382	3434077	0.546977	4.39791e-10	1.34337e-08	50.9292	43.0526
Gatad2b	R62_KO	0.912264	0.132723	3426462	0.545764	8.79279e-09	2.18627e-07	65.6637	59.5032
Kcnip3	R62_KO	0.600706	0.132741	3.448e+06	0.549194	1.65474e-11	6.48372e-10	46.5044	37.113
Rapgef4	R62_KO	1.43377	0.132911	3.41827e+06	0.544459	4.89284e-08	1.05698e-06	83.6726	78.7257
Celf5	R62_KO	0.646573	0.133026	3.46824e+06	0.552419	3.73761e-12	1.62722e-10	52.4779	42.5846
Calm2	R62_KO	1.00135	0.133196	3.41765e+06	0.544361	3.16644e-08	7.1248e-07	70.7522	62.527
Gps2	R62_KO	0.406335	0.133664	3.50319e+06	0.557986	2.75152e-18	2.79172e-16	36.6372	25.09
Pdlim7	R62_KO	0.339538	0.133904	3501533	0.557722	5.9005e-21	7.70659e-19	30.354	19.2225
Cd47	R62_KO	0.724246	0.134581	3444122	0.548577	2.98396e-10	9.34069e-09	57.4779	47.4442
Phf3	R62_KO	0.910765	0.13481	3439577	0.547853	1.78892e-09	4.99448e-08	66.7257	58.5313
Apoe	R62_KO	0.384465	0.135132	3492316	0.556254	2.11749e-18	2.20744e-16	33.5398	22.4622
Gnal	R62_KO	2.19935	0.135345	3.47654e+06	0.55374	4.9853e-11	1.77025e-09	96.1504	95.3924
Gria3	R62_KO	2.20101	0.135377	3.46506e+06	0.551912	2.18324e-10	7.00796e-09	96.1504	94.7804
L3mbtl3	R62_KO	0.562201	0.135645	3.43327e+06	0.546849	6.07952e-11	2.10614e-09	43.3186	34.4852
Hsp90ab1	R62_KO	0.685901	0.136337	3456001	0.550469	3.24529e-11	1.20118e-09	54.115	44.3125
Cacna2d2	R62_KO	0.579112	0.136458	3.47778e+06	0.553938	1.58143e-13	8.68104e-12	47.1239	36.7171
Dgkg	R62_KO	0.692824	0.136509	3433729	0.546922	5.26537e-10	1.59123e-08	51.6372	43.7005
Vgf	R62_KO	0.292658	0.136638	3.50295e+06	0.557948	2.40398e-24	4.07709e-22	26.0619	14.7228
Phf21a	R62_KO	1.76884	0.136652	3.44395e+06	0.54855	2.85438e-09	7.59587e-08	91.3274	88.2289
Jakmip1	R62_KO	1.41592	0.137131	3423463	0.545287	2.75772e-08	6.27976e-07	84.292	78.5457
Cyld	R62_KO	0.999439	0.137326	3446691	0.548987	9.72889e-10	2.82735e-08	69.8673	62.419
Slc4a3	R62_KO	0.824466	0.137501	3454794	0.550277	1.49774e-10	5.02031e-09	61.7699	53.3117
Son	R62_KO	1.5322	0.138058	3414984	0.543936	7.39207e-08	1.5272e-06	88.7611	81.9654
Adgrl1	R62_KO	0.981222	0.138081	3443311	0.548448	1.48939e-09	4.20995e-08	70.0885	62.419
Pura	R62_KO	0.696532	0.138183	3471151	0.552882	4.6777e-12	2.00576e-10	55.531	45.3564
Klc1	R62_KO	0.867148	0.138209	3.45942e+06	0.551014	1.13543e-10	3.82847e-09	64.646	56.1915
Runx1t1	R62_KO	1.62371	0.138284	3428640	0.546111	1.64244e-08	3.89625e-07	88.5841	83.9453
Luc7l2	R62_KO	1.63742	0.138378	3432647	0.54675	1.05217e-08	2.58667e-07	89.6903	85.4572
mt-Nd3	R62_KO	0.368529	0.138826	3501111	0.557654	6.90758e-21	8.7212e-19	30.885	18.8625
Snhg11	R62_KO	4.20837	0.139608	3673459	0.585106	2.31951e-25	4.39277e-23	99.6903	99.892
Nptn	R62_KO	1.79835	0.139924	3458371	0.550847	4.97524e-10	1.50756e-08	92.5664	89.0209
Grasp	R62_KO	0.251109	0.14052	3.52478e+06	0.561424	4.22374e-32	1.29714e-29	22.6106	10.4752
Abca8b	R62_KO	0.51425	0.140682	3492489	0.556281	1.23849e-15	9.07933e-14	42.3009	31.1735
Tmcc1	R62_KO	1.49907	0.142485	3442575	0.548331	3.17361e-09	8.38645e-08	86.8584	81.2455
Psap	R62_KO	0.680597	0.142947	3488052	0.555574	2.69578e-13	1.44491e-11	53.9381	44.3125
Ttll11	R62_KO	0.912876	0.143256	3.47113e+06	0.552878	2.45575e-11	9.27064e-10	64.6018	57.0194
Tnrc6c	R62_KO	1.89308	0.144022	3.47453e+06	0.55342	6.43147e-11	2.21457e-09	94.0265	91.3247
Camkv	R62_KO	0.698032	0.14425	3472923	0.553165	3.51293e-12	1.54121e-10	55.2212	45.3924
Ttc14	R62_KO	1.03742	0.144361	3452008	0.549833	5.70872e-10	1.72064e-08	72.1239	64.1829
Mpped2	R62_KO	2.10091	0.145885	3452297	0.549879	1.06257e-09	3.07226e-08	95.2212	92.7646
Tacc1	R62_KO	0.967932	0.146061	3458054	0.550796	1.98935e-10	6.51439e-09	69.0708	59.7552
Sgsm2	R62_KO	0.552902	0.146149	3492629	0.556303	5.37429e-15	3.6788e-13	45.3982	34.1973
Mgat5b	R62_KO	0.648237	0.146329	3487842	0.555541	1.30921e-13	7.25685e-12	51.5044	41.2167
Fam126b	R62_KO	0.648231	0.147038	3.49628e+06	0.556885	3.19921e-14	1.96501e-12	51.6372	40.8567
Cacnb2	R62_KO	3.44848	0.147474	3530217	0.56229	2.60491e-14	1.63534e-12	99.823	99.46
Peli2	R62_KO	0.522061	0.148232	3499138	0.55734	2.42756e-16	1.93816e-14	41.7257	30.3816
Cpne5	R62_KO	1.28245	0.148355	3464338	0.551797	1.8506e-10	6.13073e-09	80.531	73.8301
Camk2b	R62_KO	1.07066	0.149161	3471007	0.55286	5.24943e-11	1.84103e-09	72.9646	65.4428
Bcl11b	R62_KO	1.75045	0.149427	3461390	0.551328	3.37145e-10	1.04386e-08	90.9735	86.8251
Onecut2	R62_KO	0.696917	0.149711	3490068	0.555896	1.73293e-13	9.46697e-12	53.8496	43.4845
Usp32	R62_KO	0.872391	0.150176	3.47708e+06	0.553827	9.1725e-12	3.70915e-10	63.6726	55.3996
C1qtnf4	R62_KO	0.584724	0.150541	3514066	0.559718	4.05137e-16	3.13168e-14	48.5398	36.7531
Kif17	R62_KO	0.449538	0.150718	3523563	0.561231	9.03306e-20	1.02643e-17	37.9646	26.0259
Grina	R62_KO	0.481284	0.151024	3.52551e+06	0.56154	7.02552e-19	7.46084e-17	40.9735	29.2297
Dnmt3a	R62_KO	1.66764	0.151365	3480036	0.554298	3.01085e-11	1.12171e-09	89.3805	85.6371
Kcnh1	R62_KO	0.992374	0.151742	3.44774e+06	0.549153	6.51798e-10	1.95419e-08	67.1239	58.4593
Actb	R62_KO	0.501448	0.1519	3519310	0.560553	6.33501e-18	6.04914e-16	42.5664	30.4896
Snrnp48	R62_KO	0.596519	0.152684	3.52549e+06	0.561537	6.70186e-17	5.76918e-15	49.3363	37.257
Dgki	R62_KO	3.08728	0.1528	3.60221e+06	0.573758	1.90169e-19	2.11852e-17	99.6903	99.496
Srsf7	R62_KO	0.591454	0.152886	3.51145e+06	0.559301	7.79586e-16	5.78983e-14	48.7611	37.401
Slc12a5	R62_KO	0.797298	0.152924	3.50112e+06	0.557656	1.57392e-13	8.68104e-12	61.5044	50.7559
Mapt	R62_KO	1.21119	0.15303	3.47376e+06	0.553298	4.92312e-11	1.75365e-09	77.8319	71.3823
Stxbp1	R62_KO	0.842104	0.153144	3490271	0.555928	1.04629e-12	5.08078e-11	62.6991	52.6638
Pten	R62_KO	1.1806	0.153666	3476120	0.553674	3.39769e-11	1.25351e-09	76.8584	69.9424
Gad1	R62_KO	0.71494	0.153733	3484668	0.555035	5.4324e-13	2.78056e-11	55.1327	44.6724
Zdhhc17	R62_KO	0.698238	0.154633	3504360	0.558172	2.41225e-14	1.5313e-12	55.7522	44.0965
Ptpn5	R62_KO	0.846615	0.156468	3490377	0.555945	1.08142e-12	5.22901e-11	63.2743	52.7718
Atxn10	R62_KO	0.913237	0.157245	3495035	0.556687	9.62035e-13	4.7323e-11	66.9027	57.3434
Zdhhc20	R62_KO	0.937444	0.157815	3488279	0.555611	2.75803e-12	1.24858e-10	66.9912	58.4953
Sorcs3	R62_KO	1.12992	0.158363	3456433	0.550538	3.07279e-10	9.59019e-09	70.708	63.7509
Npas2	R62_KO	1.02371	0.159809	3.45822e+06	0.550824	1.83188e-10	6.10036e-09	67.6549	59.6472
Atp6v0a1	R62_KO	1.67746	0.161536	3.50044e+06	0.557547	1.90115e-12	8.92675e-11	91.5044	86.5371
Pbx3	R62_KO	1.99891	0.162336	3.45697e+06	0.550624	5.85003e-10	1.75857e-08	90.4425	87.473
Itm2c	R62_KO	0.5884	0.162868	3538847	0.563665	3.87472e-18	3.82856e-16	48.8938	36.2131
Tmem191c	R62_KO	0.558914	0.163261	3558186	0.566745	2.70199e-20	3.33725e-18	46.6814	34.1973
Ubb	R62_KO	0.415374	0.163296	3540670	0.563955	5.7643e-23	8.85132e-21	34.646	22.7502
AC149090.1	R62_KO	0.982671	0.163734	3454346	0.550206	2.27666e-10	7.28724e-09	65.177	56.2275
Arglu1	R62_KO	1.16537	0.16409	3.50454e+06	0.5582	6.53092e-13	3.29826e-11	76.7257	69.6544
Slc22a17	R62_KO	0.772934	0.164956	3.51497e+06	0.559862	1.18539e-14	7.78586e-13	59.4248	48.7041
Rgs20	R62_KO	1.19672	0.167384	3482980	0.554767	1.0838e-11	4.35168e-10	73.7611	65.8027
Epb41l1	R62_KO	1.21923	0.167521	3506029	0.558438	5.77001e-13	2.92699e-11	78.2743	71.3463
Pcsk1n	R62_KO	0.444783	0.167559	3571780	0.568911	7.57504e-25	1.36627e-22	38.3628	24.838
Gmcl1	R62_KO	0.850835	0.167595	3.53164e+06	0.562516	1.87098e-15	1.36282e-13	63.4071	53.1677
Atp1b1	R62_KO	0.995021	0.168617	3519389	0.560566	3.97758e-14	2.3788e-12	70.8407	61.2671
Gsg1l	R62_KO	0.466291	0.169518	3550331	0.565494	1.3355e-22	1.94555e-20	37.8761	25.234
Kcnip2	R62_KO	0.816707	0.170866	3513649	0.559652	1.66501e-14	1.08733e-12	59.9115	49.388
Dlgap3	R62_KO	1.0501	0.172882	3.51485e+06	0.559844	9.06297e-14	5.14913e-12	71.7699	62.923
Ypel2	R62_KO	1.03494	0.17424	3505631	0.558374	2.95104e-13	1.56695e-11	70.4425	60.4752
B3galt1	R62_KO	2.30682	0.175253	3.56006e+06	0.567044	2.43912e-16	1.93816e-14	96.1504	94.8884
Nin	R62_KO	0.878453	0.175392	3545782	0.56477	2.17924e-16	1.75622e-14	64.292	54.3557
Ablim2	R62_KO	1.95468	0.175443	3545214	0.564679	2.57304e-15	1.83883e-13	94.6018	91.6127
Tsnax	R62_KO	0.843847	0.176943	3.54628e+06	0.564848	1.38527e-16	1.14896e-14	62.9646	52.0518
Serpine2	R62_KO	0.530707	0.178734	3559209	0.566908	6.59808e-22	9.14317e-20	41.9027	29.0857
Tra2a	R62_KO	1.26538	0.178878	3.52817e+06	0.561965	2.34228e-14	1.49524e-12	80.0442	72.5342
Cit	R62_KO	1.08814	0.179928	3526046	0.561626	1.95739e-14	1.26374e-12	73.6283	64.7228
Hspa8	R62_KO	0.695232	0.181458	3.55216e+06	0.565786	2.97857e-18	2.99517e-16	54.115	41.5047
Krit1	R62_KO	0.871511	0.181678	3561039	0.5672	1.57171e-17	1.42875e-15	64.6903	53.8877
Actn1	R62_KO	0.955484	0.182786	3539360	0.563747	1.14045e-15	8.41488e-14	68.7168	57.2354
Cntn3	R62_KO	0.957789	0.183786	3.51411e+06	0.559725	3.2759e-14	2.00129e-12	63.4071	53.8157
Zfr	R62_KO	1.22954	0.184968	3562499	0.567432	9.11943e-17	7.67586e-15	78.1858	71.2383
Aplp1	R62_KO	0.586797	0.186085	3606279	0.574406	2.1441e-24	3.74191e-22	48.8496	34.9892
mt-Nd1	R62_KO	0.6258	0.188195	3551321	0.565652	7.71147e-20	8.85106e-18	46.4159	33.3333
Ddx5	R62_KO	1.8498	0.189871	3559361	0.566933	2.67551e-16	2.11123e-14	93.6726	88.9129
Rmdn1	R62_KO	1.03439	0.191037	3561129	0.567214	5.38463e-17	4.70658e-15	72.6991	61.4111
C2cd5	R62_KO	1.31401	0.191181	3565509	0.567912	6.78782e-17	5.79925e-15	81.5929	74.442
Strbp	R62_KO	2.20484	0.195679	3.60951e+06	0.57492	5.12839e-20	5.94632e-18	97.0796	94.3844
Klhl2	R62_KO	1.12356	0.196083	3549953	0.565434	4.54219e-16	3.44086e-14	74.2035	64.7228
Trim35	R62_KO	0.869069	0.198389	3591642	0.572074	4.90718e-20	5.74848e-18	64.4248	52.2678
Adgrb1	R62_KO	0.91064	0.201316	3.59633e+06	0.57282	3.04913e-20	3.72551e-18	65.885	54.1757
Ccnl2	R62_KO	0.961607	0.204946	3609838	0.574972	4.52317e-21	5.97637e-19	69.0265	57.1274
Gm20388	R62_KO	2.14669	0.205221	3.64874e+06	0.581168	3.23055e-23	5.02859e-21	96.8142	94.5644
Sorcs1	R62_KO	1.95331	0.215299	3530158	0.562281	2.50946e-14	1.58417e-12	91.2389	86.0691
Cacna1a	R62_KO	2.3078	0.218385	3658306	0.582692	4.91327e-24	8.09124e-22	97.4336	95.3564
Atp2b1	R62_KO	2.5161	0.220179	3.69127e+06	0.587944	5.71161e-27	1.2938e-24	98.6283	96.6523
Ttc19	R62_KO	0.957903	0.222535	3.64693e+06	0.580881	2.73114e-24	4.56381e-22	69.646	56.0835
Grin2a	R62_KO	2.65665	0.223296	3677754	0.58579	9.59249e-26	1.8793e-23	97.6106	97.0122
Ahi1	R62_KO	1.70263	0.22732	3.58663e+06	0.571276	2.5974e-18	2.68312e-16	89.6018	82.7574
Ndrg4	R62_KO	1.25474	0.228525	3630049	0.578192	5.46376e-22	7.66478e-20	80.7965	69.7624
Atp6v0b	R62_KO	0.848151	0.229404	3666239	0.583956	6.79983e-27	1.48589e-24	63.3628	49.784
Matk	R62_KO	0.815984	0.234287	3684648	0.586888	4.17917e-29	1.05529e-26	61.8142	46.9402
Ttr	R62_KO	0.396977	0.234327	3.74727e+06	0.596863	4.14953e-58	6.73588e-55	33.2301	14.6508
Sv2c	R62_KO	0.944567	0.235162	3606095	0.574376	1.38578e-21	1.89719e-19	61.5044	49.496
mt-Nd2	R62_KO	0.856387	0.245507	3617298	0.576161	2.63989e-23	4.16625e-21	57.5221	44.3125
Ssbp2	R62_KO	2.13291	0.249318	3679637	0.58609	6.3804e-26	1.27194e-23	94.8673	91.2887
Maml3	R62_KO	1.16506	0.255925	3612258	0.575358	3.57932e-21	4.78492e-19	69.823	58.6033
mt-Nd4	R62_KO	0.871657	0.256658	3628901	0.578009	2.17343e-24	3.74191e-22	57.6991	43.9885
Ckb	R62_KO	0.876089	0.258558	3727201	0.593666	4.69756e-33	1.66807e-30	64.1593	49.2441
Ptprn	R62_KO	0.829977	0.25949	3737002	0.595227	7.13947e-35	2.70419e-32	61.5044	45.3204
Rbm39	R62_KO	1.82905	0.270266	3720291	0.592565	9.82514e-30	2.59635e-27	93.3628	85.9971
Rimbp2	R62_KO	1.28684	0.270624	3705521	0.590213	9.29273e-29	2.29551e-26	79.2478	70.0864
Rap1gap	R62_KO	1.07935	0.271173	3.74038e+06	0.595765	6.00957e-33	2.06929e-30	73.3186	59.2513
Ogt	R62_KO	1.57331	0.272302	3737370	0.595286	1.75646e-31	4.86796e-29	89.646	80.3456
Grin1	R62_KO	1.76342	0.273753	3751342	0.597511	8.02798e-33	2.683e-30	92.1681	85.4572
Sez6	R62_KO	1.0414	0.276831	3731506	0.594352	2.22303e-32	7.01674e-30	70.0885	56.7675
Mapk4	R62_KO	0.93579	0.279235	3.73821e+06	0.595419	3.87428e-34	1.42011e-31	64.9115	49.532
Syn2	R62_KO	1.48396	0.30173	3748253	0.597019	8.70557e-33	2.82633e-30	83.0088	74.1541
Baiap2	R62_KO	1.34805	0.305188	3.79813e+06	0.604963	3.16205e-38	1.56219e-35	82.7434	70.0144
Snap25	R62_KO	2.36765	0.305679	3905999	0.622145	1.93286e-50	2.19631e-47	97.6991	95.4284
Pi4ka	R62_KO	1.49818	0.314681	3.82271e+06	0.608878	9.80218e-41	5.86222e-38	85.5752	76.0619
mt-Cytb	R62_KO	0.932064	0.320399	3765740	0.599804	1.70924e-38	8.82822e-36	60.9735	43.4845
Rsrp1	R62_KO	1.47529	0.329761	3871151	0.616594	1.84631e-46	1.61382e-43	86.8142	74.91
mt-Co1	R62_KO	1.18064	0.349506	3765209	0.59972	3.35e-36	1.31262e-33	69.2478	54.7876
mt-Co2	R62_KO	1.45797	0.401749	3820793	0.608573	2.64558e-41	1.87886e-38	77.4779	63.6789
mt-Atp6	R62_KO	1.68953	0.448256	3.83384e+06	0.610651	2.17241e-42	1.64567e-39	81.4159	68.7185
mt-Co3	R62_KO	1.71814	0.474058	3917813	0.624026	1.18858e-52	1.68822e-49	84.3805	69.1865

## Sheet: Astroglia
feature	group	avgExpr	logFC	statistic	auc	pval	padj	pct_in	pct_out
Dlg2	R62_KO	0.775791	-0.467179	548268	0.344795	6.12027e-43	3.47723e-39	55.9048	76.1658
Nrxn3	R62_KO	1.07279	-0.367994	617512	0.388342	1.28852e-22	1.46415e-19	65.9303	80.829
Sgcz	R62_KO	0.389631	-0.3442	595224	0.374325	2.84084e-33	1.07602e-29	32.4554	54.1821
Rbfox1	R62_KO	0.442448	-0.330625	612308	0.385069	2.36803e-27	5.38159e-24	36.4486	55.7365
Nkain2	R62_KO	1.12593	-0.301633	664083	0.417629	4.38786e-13	1.34755e-10	64.1461	77.1281
Lrrtm4	R62_KO	0.298022	-0.284885	627190	0.394428	1.00938e-26	1.9116e-23	25.2336	44.8557
Cntnap2	R62_KO	0.393515	-0.278789	633652	0.398491	1.06396e-22	1.34331e-19	32.6253	50.8512
Ptprd	R62_KO	1.07525	-0.277173	648176	0.407625	6.57968e-16	3.25065e-13	71.198	80.681
Fars2	R62_KO	1.06235	-0.262463	664568	0.417934	6.07183e-13	1.78711e-10	69.4987	76.2398
Csmd1	R62_KO	1.03766	-0.259413	674278	0.424041	1.58724e-11	3.46842e-09	58.1138	71.6506
Kcnip4	R62_KO	0.665844	-0.253224	662097	0.41638	2.47286e-14	1.04071e-11	47.8335	60.9178
Snhg11	R62_KO	0.663639	-0.23531	663350	0.417168	6.77587e-14	2.74979e-11	50.8921	62.9164
Nrg3	R62_KO	0.294511	-0.227733	661083	0.415742	1.49045e-18	1.20971e-15	24.2991	39.7483
Csmd3	R62_KO	0.345439	-0.22552	659195	0.414555	1.44322e-17	1.02496e-14	29.3118	44.7816
Kcnd2	R62_KO	0.928144	-0.225103	684843	0.430684	6.57086e-10	1.20427e-07	57.689	68.0977
Fgf14	R62_KO	1.67989	-0.219507	702242	0.441626	3.82342e-07	3.26997e-05	82.4979	88.8971
Il1rapl1	R62_KO	1.48331	-0.211277	695297	0.437259	4.63553e-08	5.60356e-06	79.0994	85.2702
Syt1	R62_KO	0.35834	-0.199922	677744	0.42622	1.39784e-13	5.12377e-11	30.2464	43.0052
Robo1	R62_KO	0.505373	-0.198269	680367	0.42787	1.02043e-11	2.36636e-09	39.932	52.4796
Lrp1b	R62_KO	1.32849	-0.196132	714580	0.449385	9.14386e-06	0.000448865	69.0739	77.9423
Tenm2	R62_KO	0.344775	-0.184135	690543	0.434269	2.2047e-11	4.72679e-09	29.1419	40.4885
Grm5	R62_KO	0.380272	-0.174152	690636	0.434328	5.5521e-11	1.12658e-08	31.096	43.3013
Lingo2	R62_KO	0.176799	-0.168289	685542	0.431124	4.9596e-16	2.68362e-13	15.8879	29.2376
Grm7	R62_KO	0.256489	-0.167291	694291	0.436626	5.47177e-12	1.41308e-09	22.5149	34.1229
Rora	R62_KO	3.37332	-0.159535	683585	0.429893	1.13186e-09	1.94869e-07	99.7451	99.852
St3gal4	R62_KO	0.48472	-0.158847	706627	0.444384	9.58579e-08	1.08923e-05	38.8275	47.6684
Ablim1	R62_KO	0.490081	-0.155649	707887	0.445176	1.65289e-07	1.66211e-05	39.7621	48.3346
Fgf12	R62_KO	0.606083	-0.152136	715176	0.44976	2.7247e-06	0.000157161	45.0297	52.0355
Kcnq5	R62_KO	0.261049	-0.148795	708800	0.44575	3.27364e-09	5.09566e-07	23.6194	32.7165
Fam155a	R62_KO	0.158065	-0.148583	702390	0.441719	4.34034e-13	1.34755e-10	14.0187	25.2406
Nrg1	R62_KO	0.835663	-0.147868	707194	0.44474	3.06541e-07	2.78658e-05	44.35	55.9585
Anks1b	R62_KO	0.291336	-0.145554	707538	0.444957	2.45687e-09	3.93203e-07	23.2795	34.0489
Lrrc7	R62_KO	0.308752	-0.144582	706750	0.444461	4.91893e-09	7.45251e-07	26.0833	36.4175
Agbl4	R62_KO	0.365151	-0.142807	715989	0.450272	2.46688e-07	2.31662e-05	28.1223	37.4537
Cntn5	R62_KO	0.153641	-0.142281	699372	0.439821	1.09537e-13	4.14889e-11	14.1037	25.8327
Cdh18	R62_KO	0.136899	-0.140054	706778	0.444479	6.29098e-13	1.78711e-10	12.3195	23.02
Sgcd	R62_KO	0.375707	-0.136531	731448	0.459993	1.75711e-05	0.000750603	25.8284	33.3827
Opcml	R62_KO	0.197123	-0.131675	714354	0.449243	2.5359e-09	4.00214e-07	18.1818	27.6092
Phactr1	R62_KO	0.781997	-0.13017	719068	0.452208	1.86674e-05	0.000791483	57.774	63.8046
Ralyl	R62_KO	0.104275	-0.124318	707455	0.444905	1.30035e-14	5.91034e-12	9.09091	20.1332
Ank3	R62_KO	0.254778	-0.11269	726018	0.456579	1.2706e-06	8.96761e-05	22.5149	30.3479
Erc2	R62_KO	0.183686	-0.111866	721120	0.453499	1.66382e-08	2.19837e-06	16.4826	25.4626
Galnt13	R62_KO	0.127727	-0.111065	722190	0.454171	7.89312e-10	1.4014e-07	11.8097	20.7254
Zfp949	R62_KO	0.172707	-0.110119	726729	0.457026	1.10186e-07	1.2275e-05	16.0578	24.0563
Galntl6	R62_KO	0.208975	-0.107706	727114	0.457268	4.42885e-07	3.72778e-05	18.6066	26.4989
Stx16	R62_KO	0.454407	0.100344	860864	0.541381	2.11011e-05	0.000865966	38.0629	30.718
Vegfa	R62_KO	0.327509	0.100569	862600	0.542472	9.40364e-07	6.84959e-05	28.7171	20.4293
Cbs	R62_KO	0.334212	0.100642	865020	0.543994	6.80988e-07	5.30004e-05	30.3314	21.9097
Guf1	R62_KO	0.285236	0.101979	858606	0.539961	4.8864e-07	4.08266e-05	23.5344	15.7661
Scg5	R62_KO	0.391022	0.103165	862676	0.54252	3.67404e-06	0.000206674	33.0501	24.7964
Atp5a1	R62_KO	0.362289	0.104279	863048	0.542754	2.10965e-06	0.000130995	31.2659	23.5381
Fam171b	R62_KO	0.47561	0.104369	861947	0.542062	1.91286e-05	0.000808021	39.6771	31.6802
Myo10	R62_KO	0.542213	0.105321	864871	0.543901	1.80856e-05	0.000769688	44.6049	37.2317
Tmem47	R62_KO	0.451088	0.10644	860517	0.541162	1.75205e-05	0.000750603	36.7035	28.9415
Tspan3	R62_KO	0.307031	0.106926	865728	0.54444	1.13295e-07	1.24987e-05	26.763	18.2828
Lrrc58	R62_KO	0.377763	0.108774	866278	0.544785	8.10165e-07	6.01693e-05	32.2005	23.7602
Sirpa	R62_KO	0.421448	0.109553	861123	0.541544	1.09496e-05	0.000516267	34.6644	28.0533
Pla2g7	R62_KO	0.565542	0.110024	866413	0.54487	1.29132e-05	0.000601363	45.9643	37.3797
Mt1	R62_KO	0.258756	0.110029	858868	0.540125	1.36229e-07	1.45037e-05	21.4104	13.9896
Serinc1	R62_KO	0.470357	0.111113	868234	0.546015	2.5913e-06	0.000152564	39.7621	30.4959
Dtx3	R62_KO	0.318073	0.111265	872545	0.548727	1.33741e-08	1.78788e-06	28.6321	19.319
Gabbr1	R62_KO	0.514792	0.111278	867011	0.545246	8.00985e-06	0.000406321	43.2455	35.6033
Crlf3	R62_KO	0.468669	0.112874	865793	0.54448	5.7293e-06	0.000307085	39.2523	31.3101
Ldhb	R62_KO	0.394793	0.113677	865073	0.544028	2.02493e-06	0.000129266	33.5599	25.7587
Hmgn3	R62_KO	0.238189	0.1154	874932	0.550228	1.16736e-11	2.60092e-09	21.4953	11.7691
P2ry14	R62_KO	0.225246	0.11563	872283	0.548562	5.77923e-12	1.45932e-09	19.6262	10.0666
Ubb	R62_KO	0.264268	0.115938	869813	0.547009	1.16034e-09	1.9679e-07	22.8547	13.9156
Arhgef19	R62_KO	0.234041	0.116136	875461	0.55056	8.54316e-12	2.02242e-09	21.4953	11.7691
Shisa4	R62_KO	0.229716	0.116354	874970	0.550252	7.75925e-12	1.90753e-09	21.0705	11.547
Rmdn1	R62_KO	0.440198	0.116845	874865	0.550186	1.64343e-07	1.66211e-05	37.723	28.0533
Igdcc4	R62_KO	0.371302	0.118203	869496	0.546809	1.26053e-07	1.36413e-05	30.6712	21.6136
Srsf5	R62_KO	0.599909	0.118672	868242	0.546021	1.05307e-05	0.000498584	48.0884	40.1925
Desi2	R62_KO	0.611859	0.120629	869303	0.546688	7.4601e-06	0.00038013	47.4087	40.0444
U2surp	R62_KO	0.395077	0.121186	872036	0.548407	1.06102e-07	1.1937e-05	32.9652	23.5381
Sorl1	R62_KO	0.453743	0.122759	877549	0.551874	7.93362e-08	9.29378e-06	38.4877	28.9415
S1pr1	R62_KO	0.30681	0.12394	877251	0.551686	5.39898e-10	1.02248e-07	27.0178	17.3945
Lamp1	R62_KO	0.33568	0.124173	879768	0.553269	6.40082e-10	1.19234e-07	29.4817	19.171
Nrxn2	R62_KO	0.503758	0.124445	874233	0.549788	5.38888e-07	4.37384e-05	41.5463	32.1984
Ugp2	R62_KO	0.604392	0.126581	873736	0.549476	1.90502e-06	0.000122993	47.9184	38.564
Mat2a	R62_KO	0.494914	0.130735	877558	0.55188	1.55207e-07	1.60328e-05	41.1215	31.5322
Slc7a10	R62_KO	0.383794	0.130769	878203	0.552285	7.2472e-09	1.05577e-06	32.6253	22.7239
Snrnp70	R62_KO	1.15679	0.131937	873679	0.54944	1.41731e-05	0.000640426	74.6814	70.0962
Hes5	R62_KO	0.228649	0.131939	875256	0.550432	3.16859e-13	1.05896e-10	19.0314	9.40044
mt-Nd2	R62_KO	0.338811	0.135184	870462	0.547417	9.3282e-09	1.32495e-06	26.2532	17.1725
Arhgap5	R62_KO	0.936603	0.135775	871600	0.548132	1.66679e-05	0.000722891	64.5709	58.8453
Arglu1	R62_KO	0.790255	0.136369	878060	0.552195	2.05005e-06	0.000129469	59.1334	52.2576
Itm2c	R62_KO	0.485677	0.138766	878394	0.552405	7.52286e-08	8.90441e-06	39.1674	30.0518
Prdx6	R62_KO	0.681639	0.140644	882810	0.555182	2.45167e-07	2.31662e-05	53.1011	44.2635
Hspa8	R62_KO	0.517512	0.145004	882892	0.555234	2.86497e-08	3.61718e-06	42.141	32.1244
Id4	R62_KO	0.378574	0.145631	880155	0.553512	7.61804e-10	1.37403e-07	29.9915	19.8372
Hnrnpa2b1	R62_KO	0.924001	0.146274	877665	0.551946	3.47369e-06	0.000197357	65.8454	58.7713
4930402H24Rik	R62_KO	1.76199	0.147687	876216	0.551035	9.16455e-06	0.000448865	91.079	87.1207
Luc7l2	R62_KO	1.043	0.147853	878020	0.552169	3.86931e-06	0.000215524	70.8581	62.9164
Itm2b	R62_KO	0.593017	0.1482	885759	0.557037	3.04979e-08	3.80821e-06	47.1538	36.6395
Ogt	R62_KO	0.941888	0.150093	878576	0.552519	2.53339e-06	0.000149932	64.3161	57.809
F3	R62_KO	0.564637	0.15061	885143	0.556649	2.31023e-08	2.94956e-06	44.7749	34.4189
mt-Nd4	R62_KO	0.3645	0.151056	877334	0.551738	4.51814e-10	8.70164e-08	27.1028	16.9504
Mmd2	R62_KO	0.688406	0.152089	885306	0.556752	9.5422e-08	1.08923e-05	52.3364	42.9312
Glud1	R62_KO	0.7602	0.152456	881687	0.554476	5.01639e-07	4.16068e-05	56.3297	47.4463
Dclk1	R62_KO	0.913123	0.154622	877041	0.551554	3.61547e-06	0.000204391	63.8063	56.1066
Ptprz1	R62_KO	1.9935	0.154806	881424	0.55431	2.37612e-06	0.000141863	93.8828	91.4138
Luc7l3	R62_KO	0.694793	0.155351	887680	0.558245	4.5995e-08	5.60356e-06	53.6958	42.413
Grina	R62_KO	0.425434	0.156607	893572	0.56195	2.61564e-11	5.50398e-09	35.7689	24.2783
Tprkb	R62_KO	0.594963	0.160085	879465	0.553078	1.47347e-07	1.53606e-05	43.4155	34.567
Ttc14	R62_KO	0.651363	0.161619	894180	0.562332	3.48445e-09	5.35051e-07	51.4868	40.7106
Gm20388	R62_KO	1.18133	0.164195	886041	0.557214	5.15765e-07	4.24684e-05	76.5506	69.5781
Atp1b2	R62_KO	0.378532	0.164457	889467	0.559369	1.09015e-11	2.47748e-09	30.6712	19.8372
Gja1	R62_KO	0.621261	0.168353	886488	0.557495	2.03419e-08	2.62665e-06	46.3891	35.9734
Slc6a1	R62_KO	0.681665	0.168407	896520	0.563804	1.96739e-09	3.19363e-07	52.3364	42.7831
Leng8	R62_KO	0.530327	0.171677	909300	0.571841	1.04759e-12	2.90336e-10	45.5395	32.3464
Ccnl2	R62_KO	0.533262	0.172246	903496	0.568191	7.88999e-12	1.90753e-09	43.8403	31.0141
Phkg1	R62_KO	0.731174	0.17621	893408	0.561847	6.5969e-09	9.73514e-07	53.1861	43.0792
Acsbg1	R62_KO	0.750182	0.180592	898479	0.565036	1.58838e-09	2.65422e-07	56.1597	44.9297
Pnisr	R62_KO	1.31897	0.181616	906171	0.569873	1.02072e-09	1.78438e-07	79.4393	75.0555
Fgfr3	R62_KO	0.658191	0.182174	905811	0.569647	3.04983e-11	6.30095e-09	50.6372	39.1562
Appl2	R62_KO	0.812333	0.188771	907006	0.570398	1.20252e-10	2.39724e-08	59.5582	48.9267
Scd2	R62_KO	0.689822	0.190122	890177	0.559815	9.62782e-09	1.35063e-06	48.6831	39.0822
mt-Cytb	R62_KO	0.444483	0.20111	897863	0.564649	2.14746e-13	7.39442e-11	31.8607	19.8372
Cd81	R62_KO	0.527219	0.20205	915840	0.575954	7.34414e-15	3.47715e-12	41.8862	28.1273
Ntsr2	R62_KO	0.556437	0.208309	922590	0.580199	6.28738e-16	3.24743e-13	44.1801	29.6077
Gpr37l1	R62_KO	0.42756	0.209183	926314	0.582541	4.13053e-20	3.61041e-17	35.0042	19.8372
Ndrg2	R62_KO	0.823788	0.211465	915470	0.575721	2.74678e-12	7.43134e-10	58.3687	45.3738
Rsrp1	R62_KO	0.959079	0.23493	924085	0.581139	3.54953e-13	1.15238e-10	66.9499	55.2924
Clu	R62_KO	0.785975	0.241967	920656	0.578983	9.98696e-14	3.91317e-11	53.6109	41.0067
Psap	R62_KO	0.885071	0.258045	943136	0.59312	2.96136e-17	1.86944e-14	63.7213	49.889
Ttr	R62_KO	0.43416	0.266463	957504	0.602156	7.26895e-33	2.06493e-29	34.0697	14.2857
Atp1a2	R62_KO	1.72081	0.269243	926355	0.582567	6.18766e-13	1.78711e-10	84.0272	78.5344
Bcan	R62_KO	0.922896	0.271772	943298	0.593221	2.2791e-17	1.52338e-14	63.5514	48.5566
mt-Co2	R62_KO	0.752137	0.275244	920318	0.57877	1.68551e-14	7.36634e-12	48.4282	34.641
Ckb	R62_KO	0.785428	0.283911	958894	0.60303	7.83125e-22	8.08968e-19	58.2838	41.2287
Ddx5	R62_KO	1.34745	0.285178	945170	0.594399	1.3547e-16	7.88625e-14	80.7986	68.9859
mt-Atp6	R62_KO	0.860642	0.292861	919084	0.577994	1.82419e-13	6.47757e-11	53.441	40.4885
Son	R62_KO	1.64175	0.304381	967293	0.608312	4.19567e-21	3.97295e-18	87.7655	80.681
mt-Co1	R62_KO	0.661235	0.305257	952844	0.599225	9.43532e-24	1.34017e-20	45.4545	27.4611
mt-Co3	R62_KO	0.926231	0.339276	935353	0.588225	1.38806e-16	7.88625e-14	55.8199	41.2287
Cspg5	R62_KO	1.05902	0.361372	979424	0.61594	1.53799e-25	2.4966e-22	66.61	51.8135
Cst3	R62_KO	1.42218	0.379102	951355	0.598289	3.96056e-18	3.00026e-15	74.7664	62.2502
Apoe	R62_KO	2.77272	0.7227	1085476	0.682635	1.09129e-56	1.24003e-52	98.5556	89.7853

## Sheet: Oligodendrocyte
feature	group	avgExpr	logFC	statistic	auc	pval	padj	pct_in	pct_out
Lsamp	R62_KO	1.16614	-0.386035	1713211	0.3884	2.06936e-36	2.35142e-33	68.1496	83.0942
Nrxn3	R62_KO	0.632103	-0.349069	1.66895e+06	0.378366	1.78188e-45	4.0495e-42	48.8878	67.13
Cntnap2	R62_KO	0.371046	-0.320808	1691320	0.383438	8.58947e-48	3.2534e-44	31.9009	51.9283
Adgrb3	R62_KO	0.783372	-0.313331	1.77767e+06	0.403013	3.07369e-29	2.05449e-26	53.1345	67.2197
Sgcz	R62_KO	0.4005	-0.309092	1696586	0.384631	4.47242e-46	1.2705e-42	32.8109	53.9013
Fgf14	R62_KO	0.427297	-0.30024	1.71524e+06	0.38886	3.41934e-42	5.55057e-39	35.3387	54.574
Csmd1	R62_KO	0.380003	-0.297176	1.72224e+06	0.390448	7.58414e-43	1.43631e-39	31.1931	50.9865
Celf2	R62_KO	0.567754	-0.295245	1.74278e+06	0.395103	2.73912e-35	2.82951e-32	44.4388	61.8386
Kcnip4	R62_KO	0.445402	-0.280414	1.76125e+06	0.399292	6.93688e-35	6.56865e-32	37.1587	53.3184
Lrrtm4	R62_KO	0.299478	-0.27671	1752091	0.397215	1.75771e-41	2.49661e-38	25.3792	44.2152
Nrxn1	R62_KO	0.508314	-0.273536	1785661	0.404826	1.59511e-30	1.20835e-27	39.9899	56.1435
Rbfox1	R62_KO	0.441784	-0.269913	1782048	0.404006	5.57329e-32	4.87149e-29	37.0071	52.6906
Kcnd2	R62_KO	0.467894	-0.251197	1813264	0.411083	1.56519e-27	9.36065e-25	38.2204	52.6009
Cacna2d1	R62_KO	0.216097	-0.242301	1.78674e+06	0.40507	7.39046e-41	9.33087e-38	18.7563	36.9058
Nrg1	R62_KO	0.384955	-0.224784	1.84289e+06	0.4178	2.09271e-25	1.18897e-22	32.4065	46.5919
Dlg2	R62_KO	1.99435	-0.214703	1.82938e+06	0.414738	1.15622e-21	5.25526e-19	94.5905	95.9641
Nrg3	R62_KO	0.268821	-0.211072	1853284	0.420156	7.27077e-28	4.58987e-25	23.2558	37.6233
Cadm2	R62_KO	1.93592	-0.204251	1927070	0.436884	1.44454e-12	2.04522e-10	90.1921	93.5874
Nlgn1	R62_KO	1.46579	-0.202798	1946729	0.441341	4.2287e-11	4.71085e-09	79.272	85.3363
Mdga2	R62_KO	1.71958	-0.196448	1953829	0.442951	1.52032e-10	1.57049e-08	85.3893	90.0448
Ctnnd2	R62_KO	0.567055	-0.194497	1.90429e+06	0.43172	2.03755e-16	4.63053e-14	43.1244	54.3049
Tenm2	R62_KO	0.471448	-0.192672	1888250	0.428083	3.3018e-19	1.01401e-16	35.4398	48.8789
Syt1	R62_KO	0.334611	-0.18995	1886330	0.427648	2.75055e-21	1.15758e-18	28.8675	41.704
Dcc	R62_KO	0.706632	-0.188359	1937130	0.439165	6.9035e-13	1.0057e-10	48.635	58.6996
Spock1	R62_KO	0.44323	-0.182317	1952072	0.442552	1.44212e-13	2.3749e-11	32.3054	42.6906
Adgrl3	R62_KO	0.570868	-0.180552	1933203	0.438275	9.55858e-14	1.62111e-11	43.1749	53.3632
Dscaml1	R62_KO	1.46608	-0.177477	1.94671e+06	0.441338	4.38585e-11	4.83848e-09	82.2548	86.7713
Cadps	R62_KO	0.320358	-0.173993	1.93071e+06	0.43771	1.57994e-17	3.81976e-15	24.7219	36.6368
Grid2	R62_KO	1.638	-0.171527	1984346	0.449869	1.77903e-08	1.41118e-06	82.2042	86.5471
Plcb1	R62_KO	0.265843	-0.165901	1924187	0.436231	5.44081e-19	1.58523e-16	22.9525	34.7534
Ccser1	R62_KO	0.409898	-0.162618	1946826	0.441363	3.60241e-14	6.29757e-12	31.4459	42.5112
Lrrc7	R62_KO	0.249697	-0.16253	1916473	0.434482	1.47086e-20	5.57111e-18	21.183	33.8117
Grm7	R62_KO	0.71146	-0.161265	1968815	0.446348	1.7327e-10	1.75792e-08	46.6127	56.5022
Grm5	R62_KO	0.345775	-0.160038	1941306	0.440112	3.86513e-15	7.70517e-13	29.6764	40.4484
Opcml	R62_KO	0.595333	-0.155598	1.96634e+06	0.445787	6.60968e-11	7.09762e-09	43.731	53.5874
Galntl6	R62_KO	0.18161	-0.154606	1934652	0.438603	5.00207e-21	2.02995e-18	16.3802	28.0269
Kcnq5	R62_KO	0.251447	-0.152891	1.94692e+06	0.441384	8.20708e-17	1.90321e-14	21.9919	32.87
Snhg11	R62_KO	0.861607	-0.152631	1.97113e+06	0.446874	1.11355e-09	1.03715e-07	60.1112	68.9238
Il1rapl1	R62_KO	1.57491	-0.148868	2.01468e+06	0.456747	1.17753e-06	5.89438e-05	82.2548	86.6816
Zbtb16	R62_KO	0.383819	-0.147165	1962480	0.444912	9.22452e-13	1.32681e-10	31.6481	41.4798
Cntn4	R62_KO	0.177296	-0.146484	1948567	0.441758	1.15144e-19	3.84818e-17	15.6218	26.9058
Hs6st3	R62_KO	0.147397	-0.146051	1944824	0.440909	1.07024e-21	5.06714e-19	13.5996	24.843
Gria4	R62_KO	0.356709	-0.145637	1964207	0.445303	2.51778e-13	3.97354e-11	27.8059	38.0717
Ralyl	R62_KO	0.69781	-0.143069	2014083	0.456611	1.61712e-07	9.93262e-06	44.186	52.1525
Otud7a	R62_KO	0.70724	-0.142861	1.99857e+06	0.453093	3.23096e-08	2.35343e-06	50.4044	57.9821
Lingo2	R62_KO	0.260024	-0.142775	1943722	0.440659	7.69074e-17	1.82062e-14	22.548	34.1256
Mgat4c	R62_KO	0.127742	-0.141979	1938474	0.43947	2.29091e-24	1.18325e-21	11.4257	23.4081
Cntn5	R62_KO	0.143166	-0.136842	1.95865e+06	0.444044	2.27197e-20	8.06761e-18	12.7907	23.722
Camk1d	R62_KO	0.228158	-0.136367	1962725	0.444968	9.41772e-16	2.01912e-13	20.2224	30.583
Adipor2	R62_KO	0.712549	-0.135311	2007413	0.455099	1.29057e-07	8.1471e-06	51.9717	57.8475
Fam155a	R62_KO	0.145275	-0.134	1967137	0.445968	6.63163e-19	1.88388e-16	13.3468	23.722
Agap1	R62_KO	1.27978	-0.127572	2.0209e+06	0.458156	2.49427e-06	0.000112134	78.3114	83.3632
Dgkb	R62_KO	0.307424	-0.127184	1.98704e+06	0.450481	1.97685e-11	2.36452e-09	27.1486	36.278
Negr1	R62_KO	0.781334	-0.126446	2.01233e+06	0.456213	3.4366e-07	1.95251e-05	54.8534	61.4798
Xkr4	R62_KO	0.707018	-0.120146	2034830	0.461314	4.48298e-06	0.000190075	49.545	55.5157
Fgf12	R62_KO	0.333301	-0.118878	2008976	0.455453	1.36849e-09	1.24401e-07	27.4014	35.2915
Robo2	R62_KO	0.232464	-0.117847	1993847	0.452023	1.45791e-12	2.04522e-10	20.0708	29.3274
Brinp3	R62_KO	0.334777	-0.114204	2.02739e+06	0.459628	2.5285e-08	1.89641e-06	26.1375	33.8565
Rora	R62_KO	0.390722	-0.11334	2029776	0.460169	1.20616e-07	7.69976e-06	30.0303	37.4888
Csmd2	R62_KO	0.362194	-0.112855	2033226	0.460951	1.75766e-07	1.06515e-05	29.6259	36.5022
Rims2	R62_KO	0.278686	-0.109115	2020044	0.457962	2.95278e-09	2.56125e-07	24.0647	32.0179
Nav3	R62_KO	0.224231	-0.108987	2018612	0.457638	1.85562e-10	1.86597e-08	19.4641	27.4439
Bcl2l1	R62_KO	0.520391	-0.107226	2040249	0.462543	4.25385e-06	0.000182402	41.9616	47.8475
Lrfn5	R62_KO	0.155933	-0.106782	2020728	0.458117	3.18201e-12	4.156e-10	13.9535	22.1076
Galnt13	R62_KO	0.185164	-0.10619	2012359	0.45622	4.26932e-12	5.39025e-10	16.2791	24.7085
Dmd	R62_KO	0.393326	-0.105314	2034642	0.461272	4.32906e-07	2.36496e-05	32.457	39.2377
Elmo1	R62_KO	1.69588	-0.104485	2.03859e+06	0.462167	2.18377e-05	0.000706957	89.1304	89.4619
Cdh18	R62_KO	0.132212	-0.102736	2021480	0.458288	4.00753e-13	6.15372e-11	12.1335	20.1794
Fkbp5	R62_KO	0.10879	-0.100519	2013034	0.456373	1.07165e-15	2.25504e-13	9.75733	18.4753
Limch1	R62_KO	1.1822	0.100169	2368491	0.536958	2.83992e-05	0.000886539	75.1264	71.1211
Rbm39	R62_KO	0.826136	0.100473	2370898	0.537504	1.17806e-05	0.000422282	60.4651	54.2152
Abca8a	R62_KO	0.453704	0.100525	2366501	0.536507	5.87269e-07	3.13293e-05	34.5298	27.8924
Itm2c	R62_KO	0.335497	0.100833	2.38565e+06	0.540848	1.69589e-09	1.51735e-07	28.9687	21.4798
Cntn2	R62_KO	0.775068	0.101879	2373770	0.538155	6.94042e-06	0.000276716	57.8362	51.5695
Mal	R62_KO	0.444528	0.101881	2.38464e+06	0.540618	4.48053e-08	3.20876e-06	36.7543	28.8341
Slc38a2	R62_KO	0.449691	0.102014	2377929	0.539098	1.53994e-07	9.51e-06	36.7037	29.5516
Slc22a17	R62_KO	0.370739	0.104676	2.40515e+06	0.545269	1.19752e-10	1.25995e-08	32.4065	23.4529
Pacs2	R62_KO	0.570235	0.104876	2389546	0.541732	1.85317e-07	1.1083e-05	45.8038	38.7892
Pacrg	R62_KO	0.775677	0.105203	2363622	0.535854	1.63959e-05	0.000557806	53.0839	46.1883
Syt11	R62_KO	0.70243	0.105437	2372047	0.537765	5.70129e-06	0.000234724	52.8817	46.5022
Inf2	R62_KO	0.348812	0.107013	2.41144e+06	0.546695	1.42964e-11	1.72819e-09	31.092	22.1973
Bcas1	R62_KO	1.29587	0.107149	2.37868e+06	0.539268	9.33817e-06	0.000351356	77.8059	75.5605
Itch	R62_KO	0.716566	0.108784	2.38376e+06	0.54042	1.43569e-06	7.03181e-05	55.2578	47.7578
Tcf4	R62_KO	1.34707	0.110039	2374794	0.538387	1.51287e-05	0.000525711	79.7776	77.0852
Krit1	R62_KO	0.435094	0.11048	2.39547e+06	0.543075	6.25346e-09	5.30284e-07	36.5521	28.7444
Car2	R62_KO	0.511971	0.110906	2.36231e+06	0.535556	2.67636e-06	0.00011973	37.9676	31.7937
Ank3	R62_KO	1.98981	0.112162	2.37283e+06	0.537942	2.08137e-05	0.000679614	92.8716	91.3004
Anln	R62_KO	0.845481	0.112395	2375030	0.538441	6.36937e-06	0.000257563	58.7462	52.6906
Eps15	R62_KO	0.523944	0.11447	2.41049e+06	0.54648	2.60994e-09	2.29897e-07	43.0233	34.3049
Dpp6	R62_KO	0.461912	0.115994	2412827	0.54701	4.46385e-10	4.37265e-08	38.6249	30.1794
Sh3d19	R62_KO	0.897525	0.116139	2386724	0.541092	1.9487e-06	9.18802e-05	63.7007	57.3991
Ddr1	R62_KO	0.585709	0.116458	2410452	0.546471	8.14232e-09	6.60865e-07	47.4722	39.4619
Abhd17b	R62_KO	0.619848	0.117416	2394092	0.542762	1.3967e-07	8.72014e-06	49.0394	40.5381
Ubb	R62_KO	0.295053	0.117589	2418410	0.548275	3.4799e-14	6.17846e-12	25.9858	16.9058
Psap	R62_KO	0.503847	0.119019	2.41627e+06	0.547789	5.94548e-10	5.7253e-08	41.5066	32.87
Pcyt2	R62_KO	0.342029	0.119187	2.40299e+06	0.544779	2.64339e-11	3.12884e-09	28.6653	20.583
Shisa4	R62_KO	0.263656	0.121802	2.43696e+06	0.552482	2.01989e-18	5.33768e-16	23.5086	13.4081
Fth1	R62_KO	0.49197	0.121877	2409170	0.546181	1.33761e-09	1.22575e-07	39.4843	31.6592
Dixdc1	R62_KO	0.659754	0.124263	2410016	0.546372	1.78834e-08	1.41118e-06	51.4661	43.4081
Scg5	R62_KO	0.377893	0.124584	2431499	0.551243	1.79174e-13	2.86753e-11	32.1537	22.1973
Luc7l2	R62_KO	0.884094	0.124864	2.41159e+06	0.546728	6.0727e-08	4.15687e-06	63.1446	57.1749
Erbin	R62_KO	0.926589	0.125339	2382616	0.540161	3.21258e-06	0.000141491	61.4257	58.4753
Ttll7	R62_KO	0.870338	0.130333	2418464	0.548288	2.00253e-08	1.54794e-06	62.8918	55.5605
Zdhhc20	R62_KO	0.962225	0.132322	2397151	0.543456	5.04853e-07	2.74481e-05	64.1052	58.2511
Wnk1	R62_KO	0.896501	0.134	2425885	0.54997	7.12915e-09	5.91303e-07	63.9029	57.0852
mt-Cytb	R62_KO	0.343516	0.136151	2.4201e+06	0.54866	4.71621e-14	8.11974e-12	26.8453	17.5336
mt-Co1	R62_KO	0.470866	0.139326	2426118	0.550023	5.28286e-12	6.5249e-10	35.4398	25.7399
Kif21a	R62_KO	1.06515	0.141589	2429852	0.550869	6.52571e-09	5.45233e-07	70.728	65.1121
Ninj2	R62_KO	0.540521	0.142394	2406704	0.545622	1.21751e-09	1.12476e-07	38.1193	29.7758
Dpy19l1	R62_KO	0.469578	0.143209	2461892	0.558133	9.70449e-15	1.86902e-12	39.4338	28.6547
Kif1b	R62_KO	1.60313	0.143619	2424265	0.549603	2.53678e-08	1.89641e-06	88.2204	83.4081
Hspa8	R62_KO	0.528086	0.143936	2442754	0.553794	4.21242e-12	5.37817e-10	42.7199	33.1839
Son	R62_KO	0.868793	0.144087	2.43117e+06	0.551169	2.70552e-09	2.36484e-07	63.1446	55.1121
Itm2b	R62_KO	0.545512	0.145552	2454825	0.556531	5.57382e-13	8.33359e-11	44.2366	34.3498
Gm20388	R62_KO	0.961631	0.160143	2.45432e+06	0.556416	7.97763e-11	8.47194e-09	66.4813	58.8789
Sytl2	R62_KO	0.732166	0.163987	2460647	0.557851	2.27832e-12	3.08198e-10	52.5784	42.9148
Abca2	R62_KO	0.612382	0.16473	2.48777e+06	0.564	1.66677e-15	3.43733e-13	48.6855	37.4439
Hapln2	R62_KO	0.519895	0.16521	2495446	0.56574	7.10627e-18	1.83519e-15	41.911	29.9552
Cdc37l1	R62_KO	1.03302	0.167934	2461775	0.558107	2.90389e-11	3.40175e-09	69.8686	62.0628
Aplp1	R62_KO	0.732853	0.168933	2486996	0.563824	2.38693e-14	4.30518e-12	56.0667	46.009
Ddx5	R62_KO	1.07675	0.169851	2461132	0.557961	3.60625e-11	4.09778e-09	71.5369	63.0493
Fgfr2	R62_KO	1.38055	0.170559	2.45733e+06	0.557098	1.26476e-10	1.31848e-08	82.5581	76.5471
Tmcc1	R62_KO	1.28688	0.171603	2461971	0.558151	5.02448e-11	5.48973e-09	78.362	72.7803
Nrbp2	R62_KO	0.609426	0.174047	2517069	0.570642	1.34436e-18	3.72585e-16	48.8878	36.861
Mapt	R62_KO	1.77885	0.174604	2488413	0.564146	6.10867e-13	9.01464e-11	90.6471	87.7578
Sox10	R62_KO	0.553852	0.178087	2499906	0.566751	1.0533e-17	2.60188e-15	44.2366	32.7354
Trim35	R62_KO	0.549849	0.178462	2516335	0.570476	1.64335e-19	5.33525e-17	44.8938	32.4664
Gatm	R62_KO	0.791244	0.179089	2492106	0.564983	1.47971e-14	2.80232e-12	59.0495	48.2063
mt-Co2	R62_KO	0.639688	0.182185	2461059	0.557944	1.01557e-13	1.69705e-11	43.7816	33.0942
Enpp2	R62_KO	1.63427	0.187206	2507243	0.568415	1.54471e-14	2.87747e-12	87.816	83.4978
Tubb4a	R62_KO	0.899206	0.188885	2511729	0.569432	7.42095e-16	1.62162e-13	64.7118	54.4395
Vmp1	R62_KO	1.02704	0.192602	2.48226e+06	0.562751	5.23662e-13	7.93382e-11	67.8969	59.0583
Scd2	R62_KO	0.772513	0.194483	2.52247e+06	0.571866	8.58348e-18	2.16742e-15	57.2801	44.7982
mt-Atp6	R62_KO	0.713395	0.196469	2461308	0.558001	3.42281e-13	5.32786e-11	47.1183	36.3677
Rtn4	R62_KO	1.23925	0.20092	2507273	0.568421	8.83702e-15	1.73129e-12	76.0364	69.148
Aspa	R62_KO	1.00162	0.205643	2509610	0.568951	1.69401e-15	3.43733e-13	67.4419	56.3229
Rsrp1	R62_KO	1.0269	0.212142	2543542	0.576644	1.5686e-18	4.2438e-16	70.728	60
Apoe	R62_KO	0.771462	0.220532	2531413	0.573894	4.66903e-19	1.39616e-16	55.0051	42.6457
2020-09-04	R62_KO	1.00757	0.223209	2560901	0.580579	2.01349e-20	7.3804e-18	69.9697	58.0269
Ptgds	R62_KO	0.675586	0.224894	2543142	0.576553	2.68466e-22	1.32634e-19	47.27	33.0942
mt-Co3	R62_KO	0.796147	0.225278	2496109	0.56589	5.50395e-16	1.2263e-13	50.9606	39.417
Mog	R62_KO	1.2662	0.228176	2561708	0.580762	6.40763e-20	2.20636e-17	78.3114	70.2242
Phldb1	R62_KO	1.25801	0.235722	2575783	0.583953	2.04923e-21	8.95593e-19	78.0081	69.6861
Mag	R62_KO	1.40511	0.261097	2604424	0.590446	2.0428e-24	1.10535e-21	83.4681	73.1839
Aatk	R62_KO	1.13614	0.289636	2658339	0.602669	1.03171e-31	8.37379e-29	74.4186	61.2108
Ttr	R62_KO	0.48302	0.312387	2732087	0.619389	9.96028e-68	5.65894e-64	37.7654	15.3363
Plp1	R62_KO	2.34897	0.313743	2653717	0.601622	4.31872e-30	3.0671e-27	96.1072	92.287
Npsr1	R62_KO	0.855062	0.850219	3383573	0.767087	0	0	53.7412	0.538117
